# Supplementary material for: Prescribing trends over time by non-medical independent prescribers in primary care settings across Wales (2011–2018): a secondary database analysis
Source: PubMed Central journal article supplement — BMJ Open. 2020 Oct 13;10(10):e036379. doi: 10.1136/bmjopen-2019-036379 (PMC7554451; doi:10.1136/bmjopen-2019-036379), 2020-10-13
Supplement: bmjopen-2019-036379.draft_revisions.pdf [file bmjopen-2019-036379.draft_revisions.pdf]

# BMJ Open

BMJ Open is committed to open peer review. As part of this commitment we make the peer review history of every article we publish publicly available.

When an article is published we post the peer reviewers' comments and the authors' responses online. We also post the versions of the paper that were used during peer review. These are the versions that the peer review comments apply to.

The versions of the paper that follow are the versions that were submitted during the peer review process. They are not the versions of record or the final published versions. They should not be cited or distributed as the published version of this manuscript.

BMJ Open is an open access journal and the full, final, typeset and author-corrected version of record of the manuscript is available on our site with no access controls, subscription charges or pay-per-view fees (<http://bmjopen.bmj.com>).

If you have any questions on BMJ Open's open peer review process please email [info.bmjopen@bmj.com](mailto:info.bmjopen@bmj.com)

# BMJ Open

## Prescribing trends over time by non-medical independent prescribers (NMIPs) in primary care settings across Wales (2011-2018): a secondary database analysis

|                               |                                                                                                                                                                                                                                                                                                                                                                                                                                                                                                                                                                                                                                                                                                                                                                                |
|-------------------------------|--------------------------------------------------------------------------------------------------------------------------------------------------------------------------------------------------------------------------------------------------------------------------------------------------------------------------------------------------------------------------------------------------------------------------------------------------------------------------------------------------------------------------------------------------------------------------------------------------------------------------------------------------------------------------------------------------------------------------------------------------------------------------------|
| Journal:                      | <i>BMJ Open</i>                                                                                                                                                                                                                                                                                                                                                                                                                                                                                                                                                                                                                                                                                                                                                                |
| Manuscript ID                 | bmjopen-2019-036379                                                                                                                                                                                                                                                                                                                                                                                                                                                                                                                                                                                                                                                                                                                                                            |
| Article Type:                 | Original research                                                                                                                                                                                                                                                                                                                                                                                                                                                                                                                                                                                                                                                                                                                                                              |
| Date Submitted by the Author: | 17-Dec-2019                                                                                                                                                                                                                                                                                                                                                                                                                                                                                                                                                                                                                                                                                                                                                                    |
| Complete List of Authors:     | Alghamdi, Saeed; Cardiff University, School of Pharmacy and Pharmaceutical Sciences<br>Hodson, Karen; Cardiff University, School of Pharmacy and Pharmaceutical Sciences<br>Haines, kath; University Hospital Llandough, All Wales Therapeutics and Toxicology Centre, Academic Centre<br>Deslandes, Paul; University Hospital Llandough, All Wales Therapeutics and Toxicology Centre, Academic Centre; University of South Wales - Trefforest Campus, School of Care Sciences<br>Courtenay, Molly; Cardiff University, School of Healthcare Sciences, College of Biomedical and Life Sciences<br>Hulme, Elliott ; Cardiff University, School of Pharmacy and Pharmaceutical Sciences<br>Deslandes, Rhian; Cardiff University, School of Pharmacy and Pharmaceutical Sciences |
| Keywords:                     | PRIMARY CARE                                                                                                                                                                                                                                                                                                                                                                                                                                                                                                                                                                                                                                                                                                                                                                   |
|                               |                                                                                                                                                                                                                                                                                                                                                                                                                                                                                                                                                                                                                                                                                                                                                                                |

SCHOLARONE™  
Manuscripts

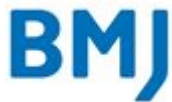

I, the Submitting Author has the right to grant and does grant on behalf of all authors of the Work (as defined in the below author licence), an exclusive licence and/or a non-exclusive licence for contributions from authors who are: i) UK Crown employees; ii) where BMJ has agreed a CC-BY licence shall apply, and/or iii) in accordance with the terms applicable for US Federal Government officers or employees acting as part of their official duties; on a worldwide, perpetual, irrevocable, royalty-free basis to BMJ Publishing Group Ltd ("BMJ") its licensees and where the relevant Journal is co-owned by BMJ to the co-owners of the Journal, to publish the Work in this journal and any other BMJ products and to exploit all rights, as set out in our [licence](#).

The Submitting Author accepts and understands that any supply made under these terms is made by BMJ to the Submitting Author unless you are acting as an employee on behalf of your employer or a postgraduate student of an affiliated institution which is paying any applicable article publishing charge ("APC") for Open Access articles. Where the Submitting Author wishes to make the Work available on an Open Access basis (and intends to pay the relevant APC), the terms of reuse of such Open Access shall be governed by a Creative Commons licence – details of these licences and which [Creative Commons](#) licence will apply to this Work are set out in our licence referred to above.

Other than as permitted in any relevant BMJ Author's Self Archiving Policies, I confirm this Work has not been accepted for publication elsewhere, is not being considered for publication elsewhere and does not duplicate material already published. I confirm all authors consent to publication of this Work and authorise the granting of this licence.

1  
2  
3  
4  
5  
6  
7  
8  
9  
10  
11  
12  
13  
14  
15  
16  
17  
18  
19  
20  
21  
22  
23  
24  
25  
26  
27  
28  
29  
30  
31  
32  
33  
34  
35  
36  
37  
38  
39  
40  
41  
42  
43  
44  
45  
46  
47  
48  
49  
50  
51  
52  
53  
54  
55  
56  
57  
58  
59  
60

## Prescribing trends over time by non-medical independent prescribers (NMIPs) in primary care settings across Wales (2011-2018): a secondary database analysis

Saeed S Alghamdi<sup>1</sup>, Karen L Hodson<sup>2</sup>, Kath Haines<sup>3</sup>, Paul Deslandes<sup>3,4</sup>, Molly Courtenay<sup>5</sup>, Elliott Hulme<sup>2</sup>, Rhian Deslandes<sup>2</sup>

1. *School of Pharmacy and Pharmaceutical Sciences, Cardiff University, Redwood Building, King Edward VII Avenue, Cardiff, CF10 3NB, Wales, United Kingdom; e-mail: [alghamdiss@cardiff.ac.uk](mailto:alghamdiss@cardiff.ac.uk); telephone number: 00447879099427*
2. *School of Pharmacy and Pharmaceutical Sciences, Cardiff University, Cardiff, Wales, United Kingdom*
3. *All Wales Therapeutics and Toxicology Centre, Academic Centre, University Hospital Llandough, Cardiff, Wales, United Kingdom*
4. *School of Care Sciences, University of South Wales, Treforest, Wales, United Kingdom*
5. *School of Healthcare Sciences, College of Biomedical and Life Sciences, Cardiff University, Cardiff, Wales, United Kingdom*

**Word count: 3444 words**

**Key words:** Non-medical prescribing, independent prescribing, primary care, prescribing analysis.

## ABSTRACT

**Introduction:** As of 2015, as part of the implementation of the Welsh Government Primary Care Plan and primary care clusters the Welsh Government has encouraged non-medical healthcare professionals working in primary care to train as independent prescribers (IPs).

**Objectives** This research aimed to identify the number of non-medical independent prescribers (NMIPs) and their associated trend of prescribed items in primary care in Wales between 2011 and 2018, which incorporates the period when primary care clusters came into practice.

**Design** Retrospective secondary data analyses and Autoregressive Integrated Moving Average Interrupted Time Series analyses in order to compare prescribing by NMIPs pre and post-implementation of primary care clusters between HBs, as well as all Wales.

**Results** Over the study period, 600 NMIPs (nurses n=474 and pharmacists n=104) had prescribed at least one item. The number of nurse IPs increased by 108% and pharmacists by 325% (pharmacists had the largest increase between July 2015 and March 2018). The total number of items/100,000 population per year prescribed by NMIPs increased over time by 200% and the largest increase was between the end of 2015 and March 2018 (90%). The differences in pre and post-implementation of primary care clusters of the prescribing trends by NMIPs in all Wales, as well as in Betsi Cadwaladr University Health Board (HB), Aneurin Bevan University HB, Cardiff and Vale University HB, Hywel Dda University HB and Powys Teaching HB were statistically significant (p value < 0.05).

**Conclusion** The number of NMIPs and their volume of prescribing in primary care in Wales has increased, with the largest increase for pharmacist IPs occurring post 2015. This suggests that the Government's recommendations of utilising NMIPs in primary care have been implemented. Future studies should focus on efficiency and quality of prescribing by NMIPs in primary care.

## STRENGTHS AND LIMITATIONS OF THIS STUDY

- This is the first study that has used a secondary database analysis, which has provided insights and empirical findings on the prescribing pattern of medicines by non-medical independent prescribers (NMIPs) over time in primary care in Wales.
- Although this study has achieved its aim and objectives, it has a number of limitations. Firstly, the data provided via the CASPA software system was limited to the last seven years. Secondly, this system was designed for financial reimbursement purposes for community pharmacies, which means that holding investigations at the level of patients or prescribers, such as stopping or changing patients' medications, as well as clinical safety issues or other prescribing activities, were not possible. In addition, this system only captured prescriptions that were dispensed in community pharmacies. Therefore, prescriptions issued by those prescribers that have not been dispensed were not captured by the system. Finally, the professions of NMIPs as pharmacist, nurse, physiotherapist or other were not identified on the prescriptions and, consequently, in the CASPA system.
- The limitation of the retrospective ARIMA design is considered the major one in this study because of the lack of the researcher control over the exposure to the intervention. In addition, unknown confounding variables, which are outside of the researcher's control, may have happened at the same time of the intervention and this leads to the difficulty of establishing causal effects[45]. However, the ARIMA analysis has the strength of evaluating data at the whole population level[46], which allowed the researchers to evaluate the utilisation of NMIPs in primary care across all of Wales.

## INTRODUCTION

The right to prescribe medicines was traditionally restricted to physicians, dentists and veterinary surgeons[1]. Prescribing practice has changed over the last 50 years to involve not only physicians and dentists (medical prescribers) but also other health care professionals, known as non-medical prescribers. The adoption of non-medical prescribing fundamentally began in the USA in the 1960s[2] and has extended to the UK, Canada, New Zealand, Australia, and other European and African nations[3]. Beyond the UK, solely nurses and pharmacists have been granted the authority to prescribe medicines collaboratively (dependently) under a physician's supervision or independently from a limited lists of medicines[4-7]. The drive to extend the medicines prescribing mandate to non-medical healthcare professionals was related to a variety of aspects within every nation.

In the UK, non-medical prescribing was introduced as part of the National Health Service (NHS) plans, which intended to improve and modernise the health care system[8,9]. The aim of introducing non-medical prescribing was to enhance patient care and safety, improve patient access and choice of appropriate medicines for their conditions, use the already gained skills of health care professionals in the most effective way, and promote a more flexible teamwork environment in the NHS[10]. Pharmacists, nurses, and Allied Health Professionals (AHPs) can qualify as non-medical prescribers after completing an advanced prescribing training programme[10]. This programme lawfully allows these healthcare professionals to prescribe medicines, appliances, and wound dressings as either independent or supplementary prescribers within their clinical area of competence.

Independent prescribing is defined as 'prescribing by a practitioner (e.g. a doctor, dentist, nurse, or a pharmacist) responsible and accountable for the

1  
2  
3 assessment of patients with undiagnosed or diagnosed conditions and for decisions  
4 about the clinical management required, including prescribing'[10]. Whereas,  
5  
6 supplementary prescribing is a 'voluntary partnership between the responsible  
7  
8 independent prescriber and a supplementary prescriber, to implement an agreed  
9  
10 patient-specific clinical management plan with the patient's agreement, particularly but  
11  
12 not only in relation to prescribing for a specific non-acute medical condition or health  
13  
14 need affecting the patient'[11]. Non-medical independent prescribing was introduced  
15  
16 in the UK in 2002 after a change in the legislation made by the UK Government  
17  
18 allowing the first level registered nurses who have at least 3 years of experience to  
19  
20 prescribe independently from a limited list of medicines[12]. In 2006, independent  
21  
22 prescribing extended for qualified nurses and pharmacists who completed the  
23  
24 necessary training to prescribe any medicines within their area of competence with  
25  
26 few exceptions[10]. This was followed by the introduction of optometrist independent  
27  
28 prescribing in 2007[13], and more recently, independent prescribing by AHPs  
29  
30 including podiatrists and physiotherapists independent prescribing in 2013[14], and  
31  
32 therapeutic radiographers independent prescribing in 2016[15]. In 2017, the estimated  
33  
34 number of non-medical independent prescribers (NMIPs) in the UK was as follows:  
35  
36 30,000 nurse independent prescribers (IPs); 3,000 pharmacist IPs and 600 AHP  
37  
38 IPs[16]. All NMIPs are responsible and accountable for their own prescribing and  
39  
40 limiting their prescribing to their therapeutic area of expertise[9]. Moreover, these  
41  
42 healthcare professionals are required to seek appropriate advice or referral if they lack  
43  
44 the confidence to manage patients' conditions or prescribe the suitable medicines for  
45  
46 their patients[9].  
47  
48  
49  
50  
51  
52  
53  
54

55  
56 In Wales, the NHS provides its services via three NHS Trusts and seven health  
57  
58 boards (HBs). The seven HBs are Swansea Bay University HB (SBUHB), Cardiff and  
59  
60



1  
2  
3 Vale University HB (CVUHB), Cwm Taf Morgannwg University HB (CTMUHB), Hywel  
4 Dda University HB (HDUHB), Powys Teaching HB (PTHB), Betsi Cadwaladr  
5 University HB (BCUHB) and Aneurin Bevan University HB (ABUHB). The SBUHB was  
6 formerly known as Abertawe Bro Morgannwg University HB (ABMUHB), having being  
7 renamed in 2019.  
8  
9

10  
11  
12  
13  
14  
15 Primary health care services are the initial point of care for patients in the NHS.  
16  
17 In Wales, it has been estimated that around 90% of people's contact with the NHS is  
18 with primary care services with General Practices the main point of contact[17]. In  
19 2016, there were 441 General Practices in Wales and 2,009 General Practitioners  
20 (GPs) (excluding, locums, retainers, and registrars)[18]. The Welsh Government and  
21 HBs have focused upon improving primary care services[17] and this has included the  
22 development of primary care clusters. Clusters comprise groups of adjacent general  
23 practices that have linked together to provide advanced medical services locally in  
24 order to relieve pressure on hospitals[19]. The aims of these clusters include improving  
25 patients' access to their medicines and information as well as the provision of advice  
26 and support to manage medicines. These clusters came into being in the last quarter  
27 of 2015[19]. Currently, there are 64 primary care clusters in Wales which provide  
28 services for a population of 30,000 to 50,000 patients per cluster[19]. In order to  
29 overcome GP shortages[20,21], these clusters are supported by high numbers of  
30 hospital pharmacists, nurses and other professionals. In addition, the Welsh  
31 Government and HBs have prioritised funding for new posts and training of other  
32 health care professionals, such as pharmacist and nurse IPs[17]. Consequently, the  
33 number of non-medical prescribers in primary care has increased in recent years and  
34 is expected to rise further[16,21].  
35  
36  
37  
38  
39  
40  
41  
42  
43  
44  
45  
46  
47  
48  
49  
50  
51  
52  
53  
54  
55  
56

57  
58 Only one published study has investigated the implementation of non-medical  
59  
60

1  
2  
3 prescribing in Wales[16]. This study aimed to provide an overview of the  
4  
5 implementation and utilisation of non-medical prescribing in all health care sectors  
6  
7 through a national questionnaire survey. The results of this study indicated that the  
8  
9 majority of non-medical prescribers in Wales were based in secondary care settings.  
10  
11 Moreover, these researchers stated that the utilisation of non-medical prescribers  
12  
13 across Wales, particularly in primary care, was inconsistent and had not been  
14  
15 implemented in all services. In addition, it was suggested that there was a need to  
16  
17 investigate and recognise the development of primary care services in Wales, with  
18  
19 support required for non-medical prescribers[16].  
20  
21  
22  
23

24 The aim of this study was to describe changes in the number of NMIPs in Wales  
25  
26 and their prescribing volume (from April 2011 to March 2018) as a whole, as well as  
27  
28 within the seven HBs, before and after the implementation of primary care clusters.  
29  
30 This is the first study in Wales to use data obtained through a national database to  
31  
32 review prescribing volume by NMIPs in primary care. No equivalent studies have been  
33  
34 published internationally.  
35  
36  
37  
38  
39  
40  
41  
42  
43  
44  
45  
46  
47  
48  
49  
50  
51  
52  
53  
54  
55  
56  
57  
58  
59  
60

## METHODOLOGY

The study design was a retrospective secondary data analysis of monthly data for prescriptions issued by NMIPs in primary care in Wales and dispensed in community pharmacies, as well as the data on the number of NMIPs within primary care in Wales.

The number of NMIPs who prescribed each month and who prescribed at least one item from April 2011 to March 2018 was obtained through the NHS Wales Shared Services Partnership, Primary Care Services. Prescribing data were obtained from the Comparative Analysis System for Prescribing Audit (CASPA) software system (Version 5), provided by the NHS Wales Shared Services. Data were fully anonymised and recorded as part of routine practice, as such, the study did not require ethical approval. CASPA records all dispensed WP10 prescriptions (Welsh prescriptions for use in primary care), to allow financial reimbursement to community pharmacies[9]. Whilst it is acknowledged that dispensing may not fully reflect prescribing, due to patients not taking their prescriptions to a pharmacy for dispensing, the impact of this is likely to be small[22], and therefore dispensing was used as a surrogate marker for prescribing in this study.

The number of items refers to a single item prescribed by a prescriber on a prescription form[23]. All recorded WP10 prescriptions issued by GPs and NMIPs in Wales and dispensed by community pharmacists from April 2011 to March 2018 were extracted and included in the study. The number of prescribed items by NMIPs were extracted from the CASPA system on a monthly basis, the total number of items per 100,000 population per year (the population data in Wales as a whole and in each HB obtained from the Welsh Government Stats Wales[24]) was calculated in order to illustrate changes in the prescribing rate in each financial year (April to March).

1  
2  
3 Percentages were calculated for the total number of prescribed items by NMIPs in  
4 each HB. The name of ABMUHB was used to illustrate the findings in this HB as this  
5 was its name over the study period.  
6  
7  
8  
9

10 Although Randomised Controlled Trails (RCTs) are considered the gold  
11 standard method to evaluate longitudinal effects of interventions over time[25-27], they  
12 lack the ability to evaluate the already implemented service retrospectively[27].  
13 Therefore, prescribing data were compared by using a series of Autoregressive  
14 Integrated Moving Average (ARIMA) Interrupted Time Series (ITS) analyses. ITS  
15 analysis has been used to assess healthcare interventions over time in previous  
16 studies[26-30]. Cochrane Effective Practice and Organisation of Care (EPOC)  
17 guidance[31] was followed and IBM SPSS software (Version 25) was used to conduct  
18 the ARIMA statistical analysis.  
19  
20  
21  
22  
23  
24  
25  
26  
27  
28  
29

30 The difference in slope between the pre and post-intervention (pre and post-  
31 implementation of primary care clusters) regression lines is the change in the trend of  
32 prescribing by NMIPs. In order to understand whether the changes in prescribing over  
33 time occurred at a gradual or abrupt onset, step changes were investigated at five time  
34 points after the intervention (3, 6, 9, 12 and 24-month time points). The step change,  
35 which is also known as the change in the level of prescribing by NMIPs, is the  
36 difference between the outcome at the first post-intervention time point and that  
37 anticipated by the pre-intervention trend. The findings were assumed significant at p  
38 value <0.05. Confidence intervals (CIs) were calculated in order to be 95% certain that  
39 the range of values contained the true mean of the data[32].  
40  
41  
42  
43  
44  
45  
46  
47  
48  
49  
50  
51  
52

53 Data were organised in three periods as follows: pre-intervention phase (April  
54 2011 to September 2015), intervention phase (October 2015 to December 2015) and  
55 post-intervention phase (January 2016 to March 2018). The Welsh Government  
56  
57  
58  
59  
60

1  
2  
3 plan[17] encouraged local HBs to prioritise funding and development of primary care  
4 clusters. However, the implementation of these clusters is the responsibility of each  
5 individual local HB and there are no definitive time points of their establishment. To  
6  
7 accommodate this, the researcher engaged with the relevant stakeholders (e.g. policy  
8 makers and Chief of Pharmaceutical Officer) to determine the appropriate length of an  
9  
10 intervention phase. They agreed the intervention phase should be three months.  
11  
12  
13  
14  
15  
16  
17  
18  
19  
20  
21  
22  
23  
24  
25  
26  
27  
28  
29  
30  
31  
32  
33  
34  
35  
36  
37  
38  
39  
40  
41  
42  
43  
44  
45  
46  
47  
48  
49  
50  
51  
52  
53  
54  
55  
56  
57  
58  
59  
60

For peer review only

## RESULTS

### Trend of the total number of items prescribed by all prescribers

The total number of items prescribed by all health care professionals (GPs and non-medical prescribers) from April 2011 to March 2018 was 540,781,584 items (17,482,150 per 100,000 population). The total number of prescribed items per 100,000 population per year increased by 7.1% between 2011-2012 (n= 2,371,511) and 2014-2015 (n= 2,539,192) and increased by 0.7% between 2014-2015 (n= 2,539,192) and 2017-2018 (n= 2,556,784] (Figure 1).

### Trend of the total number of items prescribed by NMIPs

The total number of items prescribed by NMIPs in primary care in Wales between April 2011 and March 2018 was 5,088,405 items (n= 164,130 per 100,000 population). The number of items prescribed as a percentage of all items prescribed by all health care professionals (except items prescribed by dentists) increased from 0.57% in 2011-2012 to 1.7% in 2017-2018. The total prescribed items per 100,000 population per year increased from 2011-2012 (n= 13,622) to 2017-2018 (n= 40,1234) by 194.5%, while the largest increase was from the last quarter of 2015 to 17-18 (Figure 2).

### The total number of NMIPs

Data obtained from the NHS Wales Shared Services Partnership shows that the total number of NMIPs who prescribed at least one item from April 2011 to March 2018 was 600 prescribers (474 nurses, 104 pharmacists, 21 physiotherapists and 1 with unknown profession). The number of NMIPs in each HB is illustrated in figure 3.

1  
2  
3 The number of prescribing NMIPs per month increased by approximately 140%  
4 between April 2011 (n=174) and March 2018 (n=414). Of those, the number of nurses  
5 increased from 158 in April 2011 to 328 in March 2018 (an increase of 108%). The  
6 number of pharmacists increased from 16 in April 2011 to 68 in March 2018 (an  
7 increase of 325%), the largest increase was from July 2015 (n=20) to March 2018  
8 (n=68) by 240%. In January 2015, the first physiotherapist IP started to prescribe with  
9 the number increasing to 17 by March 2018.

### 20 **Trend of the total number of prescribed items by NMIPs in different HBs pre** 21 **and post-intervention**

22  
23  
24  
25  
26 Table 1 presents the total number of items prescribed by NMIPs, as well as the  
27 number per 100,000 population and percentage of all items prescribed, per HB.  
28 Approximately one third of the items prescribed by NMIPs was within BCUHB (Table  
29 1) with only 4% in PTHB. Figure 4 illustrates the trends of the total number of items  
30 per 100,000 population prescribed from April 2011 to March 2018. Table 2  
31 summarises the eight ARIMA analyses findings, in order to compare between HBs, as  
32 well as all Wales. The positive values represent the increase in the average of the  
33 number of items prescribed by NMIPs per month, while the decrease is represented  
34 by negative values. The differences in pre and post-intervention of the prescribing  
35 trends of all Wales, as well as in BCUHB, ABUHB, CVUHB, HDUHB and PTHB were  
36 statistically significant (Table 2).

*Table 1 Total number of items prescribed by NMIPs, as well as the number per 100,000 population and percentage of all items prescribed, per HB in primary care in Wales and dispensed in community pharmacies since April 2011 until March 2018*

| Number | Health Board | Total number of items prescribed by NMIPs | % of the prescribed items by NMIPs | Prescribed items by NMIPs per 100,000 population |
|--------|--------------|-------------------------------------------|------------------------------------|--------------------------------------------------|
| 1      | BCUHB        | 1,711,949                                 | 33.64%                             | 240,742.5                                        |
| 2      | ABUHB        | 834,879                                   | 16.41%                             | 139,396.5                                        |
| 3      | CVUHB        | 711,805                                   | 13.99%                             | 145,069.9                                        |
| 4      | HDUHB        | 686,166                                   | 13.48%                             | 172,782.9                                        |
| 5      | ABMUHB       | 573,624                                   | 11.27%                             | 106,813.2                                        |
| 6      | CTMUHB       | 371,315                                   | 7.30%                              | 122,620.2                                        |
| 7      | PTHB         | 198,667                                   | 3.91%                              | 137,000.6                                        |

**ABMUHB** (Abertawe Bro Morgannwg University HB); **ABUHB** (Aneurin Bevan University HB); **BCUHB** (Betsi Cadwaladr University HB); **CTMUHB** (Cwm Taf Morgannwg University HB); **CVUHB** (Cardiff and Vale University HB); **HDUHB** (Hywel Dda University HB); **PTHB** (Powys Teaching HB)



Table 2 Pre and post-intervention differences of the prescribing trends carried out by NMIPs in primary care in Wales. Statistically significant results ( $p$  value  $< 0.05$  is significant) are in the white shading, whereas non-significant results are in the dark grey shading

| Number | All Wales and HBs | Pre-intervention slope | Post-intervention slope | Difference in p value | 95% CI         |
|--------|-------------------|------------------------|-------------------------|-----------------------|----------------|
| 1      | All Wales         | 497                    | 1732                    | <0.001                | 1,016 to 1,454 |
| 2      | BCUHB             | 243                    | 430                     | 0.014                 | 38 to 337      |
| 3      | ABUHB             | 110                    | 245                     | 0.001                 | 54 to 217      |
| 4      | CVUHB             | 6                      | 68                      | 0.043                 | 13 to 122      |
| 5      | HDUHB             | 45                     | 431                     | <0.001                | 262 to 510     |
| 6      | PTHB              | -20                    | 518                     | 0.004                 | 180 to 897     |
| 7      | ABMUHB            | 75                     | 140                     | 0.188                 | -32 to 162     |
| 8      | CTMUHB            | -525                   | -501                    | 0.473                 | -43 to 91      |

**ABMUHB** (Abertawe Bro Morgannwg University HB); **ABUHB** (Aneurin Bevan University HB); **BCUHB** (Betsi Cadwaladr University HB); **CTMUHB** (Cwm Taf Morgannwg University HB); **CVUHB** (Cardiff and Vale University HB); **HDUHB** (Hywel Dda University HB); **PTHB** (Powys Teaching HB)

### Step changes analysis for NMIPs

Table 3 demonstrates the step changes in the prescribed number of items by NMIPs in all Wales and in each HB at five post-intervention time points. At all post-intervention time points, step changes were significant in all Wales, BCUHB and HDUHB. Step changes in PTHB were significant at 9, 12 and 24 post-intervention months' points, whereas step changes in ABMUHB and ABUHB were significant at 12 and 24 post-intervention months' points. Step changes in CVUHB and CTMUHB were not statistically significant.

Table 3 step changes in the prescribed number of items by NMIPs in primary care and dispensed in community pharmacies in all Wales and in each HB. Statistically significant results are in the white shading, while non-significant results are in the dark grey shading

| All Wales and HBs | post-intervention time points: n (p value) |                   |                   |                   |                   |
|-------------------|--------------------------------------------|-------------------|-------------------|-------------------|-------------------|
|                   | 3 months                                   | 6 months          | 9 months          | 12 months         | 24 months         |
| All Wales         | 6801<br>(0.001)                            | 10506<br>(<0.001) | 14211<br>(<0.001) | 17917<br>(<0.001) | 32738<br>(<0.001) |
| BCUHB             | 2821<br>(0.032)                            | 3384<br>(0.008)   | 3947<br>(0.002)   | 4509<br>(0.001)   | 6759<br>(<0.001)  |
| HDUHB             | 1796<br>(0.049)                            | 2955<br>(0.001)   | 4113<br>(<0.001)  | 5272<br>(<0.001)  | 9907<br>(<0.001)  |
| PTHB              | 730<br>(0.586)                             | 2346<br>(0.133)   | 3961<br>(0.040)   | 5577<br>(0.018)   | 12039 (0.006)     |
| ABMUHB            | 950<br>(0.177)                             | 1145<br>(0.100)   | 1340<br>(0.063)   | 1535<br>(0.047)   | 2314<br>(0.046)   |
| ABUHB             | 364<br>(0.575)                             | 770<br>(0.225)    | 1176<br>(0.068)   | 1582<br>(0.020)   | 3206<br>(0.001)   |
| CVUHB             | -96<br>(0.857)                             | 89<br>(0.861)     | 274<br>(0.587)    | 458<br>(0.373)    | 1197<br>(0.082)   |
| CTMUHB            | 852<br>(0.138)                             | 925<br>(0.095)    | 997<br>(0.071)    | 1070<br>(0.061)   | 1360<br>(0.080)   |

**ABMUHB** (Abertawe Bro Morgannwg University HB); **ABUHB** (Aneurin Bevan University HB); **BCUHB** (Betsi Cadwaladr University HB); **CTMUHB** (Cwm Taf Morgannwg University HB); **CVUHB** (Cardiff and Vale University HB); **HDUHB** (Hywel Dda University HB); **PTHB** (Powys Teaching HB)

## DISCUSSION

### Overview

This study investigated the number and associated prescribing trends of NMIPs before and after the implementation of primary care clusters in Wales.

### Number of NMIPs

The majority of NMIPs in primary care in Wales were nurses, followed by pharmacists, and physiotherapists. Although the number of nurse IPs is much greater than pharmacist IPs, they only represent 5% of the nursing workforce[33], while pharmacist IPs represent 7% of the pharmacist profession[34]. The fact that there are more nurse IPs than other professions is in line with the findings of other studies that have investigated the implementation of non-medical prescribing in England[35,36] and Wales[16]. Interestingly, the database did not identify other health care professionals who have prescribing authorisation in Wales, including therapeutic radiographers, chiropodists and podiatrists, and optometrists[16]. Therapeutic radiographer IPs are based within secondary or tertiary care settings in Wales and therefore, they would be unlikely to be included in the database. However, the other professions could potentially be working in primary care settings but do not appear to have issued NHS prescriptions. This is wasteful in terms of the time and expenses incurred for training and failure to deliver an improved service to patients.

The increase in the number of NMIPs in primary care in Wales may suggest that the primary care sector has recognised the skills of these practitioners, improving the skill-mix in this sector, and hopefully reducing the pressure on GPs i.e. the benefits described in the second Crown Report[37]. Since the last quarter of 2015, the increase

1  
2  
3 in the percentage of pharmacist IPs was higher than the increase in the percentage of  
4 nurse IPs (325% vs 108%). This could be explained by the implementation of the  
5  
6 Welsh Government Plan[17], introduction of primary care clusters[19], and the  
7  
8 shortage of GPs in Wales, particularly in BCUHB[15,36,37,38]. All of these factors  
9  
10 may have contributed to recruitment of more pharmacist IPs[17]. Pharmacist  
11  
12 independent prescribing is a new role for pharmacists within clusters, with many  
13  
14 secondary care based pharmacist IPs moving into these positions[21]. This may lead  
15  
16 to a shortage of pharmacists within secondary care and has highlighted the need for  
17  
18 a pharmacy workforce plan for Wales  
19  
20  
21  
22  
23  
24

### 25 **Prescribing by NMIPs over the study period**

26  
27  
28 The increase in the number of NMIPs, particularly pharmacist IPs, may explain  
29  
30 the increased rate of prescribing of medicines by these practitioners over the same  
31  
32 period. The high number of prescribed items by NMIPs in BCUHB (34%) compared to  
33  
34 other HBs could be explained by the high number of NMIPs in BCUHB (246 NMIPs).  
35  
36  
37  
38

### 39 **Prescribing by NMIPs before and after the implementation of primary care** 40 **clusters**

41  
42  
43  
44 It is evident that the utilisation of NMIPs is inconsistent across the seven HBs  
45  
46 in Wales, which supports previous research[16]. Step changes in the prescribed  
47  
48 number of items by NMIPs before and after the implementation of primary care  
49  
50 clusters were observed after 3 months in all Wales, BCUHB and HDUHB. However,  
51  
52 step changes were not seen until much later in PTHB (after 9 months) and after 12  
53  
54 months in ABUHB and ABMUHB. In contrast, step changes were absent in CTMUHB  
55  
56 and CVUHB within the same time period. HBs can therefore be classified in relation  
57  
58  
59  
60

1  
2  
3 to the intervention in this study into the following categories: early adopters (BCUHB  
4 and HDUHB), a mid-term adopter (PTHB), and late adopters (ABUHB, ABMUHB,  
5 CTMUHB and CVUHB) of NMIPs.  
6  
7  
8

9  
10 BCUHB and HDUHB represent the largest geographical areas in Wales  
11 compared to other HBs[41], but have the lowest number of GPs per 10,000 population  
12 (6.1 and 5.8, retrospectively)[42]. The low number of GPs in these HBs could be  
13 related to issues of recruitment, as well as the difficulty in keeping those who are  
14 already employed in their positions[38,39]. The shortage of GPs in these HBs, may  
15 explain the early adoption of non-medical independent prescribing.  
16  
17  
18  
19  
20  
21  
22

23  
24 Although there is a lack of evidence with regards to the barriers to implementing  
25 non-medical independent prescribing in Wales, reasons that may have contributed to  
26 the lack of utilisation of this service in the late adopter HBs could include the lack of  
27 funding[16, 35, 43, 44] and lack of a plan or strategy to develop this service[35].  
28 However, these studies are outdated given the pace of change and may not reflect  
29 recent practice and policies. Due to the lack of evidence regarding the impact of these  
30 barriers on the implementation of non-medical independent prescribing in each HB,  
31 further research is required to investigate this matter. This study provides the initial  
32 evidence for such research, as well as providing the opportunity to share learning  
33 among HBs.  
34  
35  
36  
37  
38  
39  
40  
41  
42  
43  
44  
45  
46  
47

## 48 **FUTURE STUDIES**

49  
50  
51 This study provides a research agenda for further investigation to examine  
52 questions related to efficiency, quality of prescribing, cost effectiveness, and improved  
53 access to services provided by NMIPs. With the presence of some variety and  
54 inconsistency in the prescribing trend of NMIPs across different HBs, this provides an  
55  
56  
57  
58  
59  
60

1  
2  
3 opportunity to share the knowledge on advanced and novel services provided by these  
4 prescribers as well as to investigate the reasons behind it.  
5  
6  
7

## 8 9 **CONCLUSION**

10  
11  
12 The number of NMIPs and their prescribing trends of medicines increased in  
13 the majority of HBs, particularly the number of pharmacist IPs since the last quarter of  
14 2015. This could be related to the implementation of the Welsh Government Plan[17]  
15 and the introduction of primary care clusters. The findings of this study may suggest  
16 that the increased number of NMIPs in the primary care sector in Wales over time may  
17 help to reduce the pressure on GPs and improve the skill-mix across different  
18 therapeutic areas. This aligns with the main reasons for the implementation of non-  
19 medical prescribing in the UK, as outlined in the second Crown Report[37]. Future  
20 studies should focus on efficiency and quality of prescribing by NMIPs in primary care.  
21  
22  
23  
24  
25  
26  
27  
28  
29  
30  
31  
32  
33

## 34 **Acknowledgments**

35  
36  
37 We would like to thank All Wales Therapeutics and Toxicology Centre (AWTTC)  
38 in Cardiff who granted the permission for the team to access the CASPA system and  
39 extract the data. Moreover, we are grateful to Taif University and the Government of  
40 Saudi Arabia represented by the Saudi Arabian Cultural Bureau (SACB) in the United  
41 Kingdom for funding the lead author in order to conduct this project.  
42  
43  
44  
45  
46  
47  
48  
49  
50  
51  
52  
53  
54  
55  
56  
57  
58  
59  
60

1  
2  
3 **CONTRIBUTORSHIP STATEMENT** - SA made a substantial contribution to the  
4 conception and design of the work; the acquisition, analysis and interpretation of data;  
5 and drafting of the work. RD and KLH made a substantial contribution to the design of  
6 the work, acquisition, analysis, and interpretation of data. PD made a substantial  
7 contribution to data acquisition, analysis and interpretation. KH made a substantial  
8 contribution to the data acquisition and interpretation of data. MC made a substantial  
9 contribution to the design of the work and interpretation of data. EH made a substantial  
10 contribution to data analysis and interpretation. All authors critically revised drafts of  
11 the work and approved the final version to be published and agree to be accountable  
12 for all aspects of the work in ensuring that questions related to the accuracy or integrity  
13 of any part of the work are appropriately investigated and resolved.  
14  
15  
16  
17  
18  
19  
20  
21  
22

23 **Competing interests** - All authors the ICMJE uniform disclosure form  
24 at [www.icmje.org/coi\\_disclosure.pdf](http://www.icmje.org/coi_disclosure.pdf) and declare: no support from any organisation  
25 for the submitted work; no financial relationships with any organisations that might  
26 have an interest in the submitted work in the previous three years, no other  
27 relationships or activities that could appear to have influenced the submitted work.  
28  
29  
30  
31  
32

33 **Funding** – the only funding for this study was received from Taif University, Kingdom  
34 of Saudi Arabia (KSA) represented by the Saudi Arabian Cultural Bureau (SACB) in  
35 the United Kingdom for the lead author to do this research as a part of his PhD study.  
36  
37  
38

39 **DATA SHARING STATEMENT** - No additional data available  
40  
41

42 **Transparency declaration** - The lead author affirms that the manuscript is an honest,  
43 accurate, and transparent account of the study being reported; that no important  
44 aspects of the study have been omitted; and that any discrepancies from the study as  
45 planned (and, if relevant, registered) have been explained.  
46  
47  
48

49 **INTEGRITY OF THE DATA AND ACCURACY OF THE DATA ANALYSIS** - All  
50 authors had full access to all the data (including statistical reports and tables) in the  
51 study and can take responsibility for the integrity of the data and the accuracy of the  
52 data analysis.  
53  
54  
55

56  
57 **Ethics approval** - No ethical approval required.  
58  
59  
60

1  
2  
3 **Patient and public involvement** - This research was done without patient and public  
4 involvement. Patients were not invited to comment on the study design and were not  
5 consulted to develop patient relevant outcomes or interpret the results. Patients were  
6 not invited to contribute to the writing or editing of this document for readability or  
7 accuracy.  
8  
9  
10  
11  
12  
13  
14  
15  
16  
17  
18  
19  
20  
21  
22  
23  
24  
25  
26  
27  
28  
29  
30  
31  
32  
33  
34  
35  
36  
37  
38  
39  
40  
41  
42  
43  
44  
45  
46  
47  
48  
49  
50  
51  
52  
53  
54  
55  
56  
57  
58  
59  
60

For peer review only



## REFERENCES

1. Department of Health. Medicines Act 1968. 1968; DOH: London. Available at: <http://www.legislation.gov.uk/ukpga/1968/67> (last accessed 08 July 2019).
2. Craig E. A Review of Prescriptive Authority for Nurse Practitioners. *The Journal of Perinatal & Neonatal Nursing*. 1996;10(1):29-35.
3. Kroezen M, van Dijk L, Groenewegen P, et al. Nurse prescribing of medicines in Western European and Anglo-Saxon countries: a systematic review of the literature. *BMC Health Services Research*. 2011;11(1).
4. McBane S, Dopp A, Abe A, et al. Collaborative Drug Therapy Management and Comprehensive Medication Management—2015. *Pharmacotherapy: The Journal of Human Pharmacology and Drug Therapy*. 2015;35(4): e39-e50.
5. Alberta College of Pharmacists. Guide to Receiving Additional Prescribing Authorization. 2013; Alberta: 2<sup>nd</sup> edition, January. Available at: <https://pharmacists.ab.ca/sites/default/files/APAGuide.pdf> (last accessed 08 July 2019).
6. Raghunandan R, Tordoff J, Smith A. Non-medical prescribing in New Zealand: an overview of prescribing rights, service delivery models and training. *Therapeutic Advances in Drug Safety*. 2017;8(11):349-360.
7. Dunn S, Cashin A, Buckley T, et al. Nurse practitioner prescribing practice in Australia. *Journal of the American Academy of Nurse Practitioners*. 2010;22(3):150-155.
8. Department of Health. The NHS Plan: A plan for investment. A plan for reform. 2000; DOH: London: July. Available at: [http://webarchive.nationalarchives.gov.uk/20130124064356/http://www.dh.gov.uk/prod\\_consum\\_dh/groups/dh\\_digitalassets/@dh/@en/@ps/documents/digitalasset/dh\\_118522.pdf](http://webarchive.nationalarchives.gov.uk/20130124064356/http://www.dh.gov.uk/prod_consum_dh/groups/dh_digitalassets/@dh/@en/@ps/documents/digitalasset/dh_118522.pdf) (last accessed 08 July 2019).
9. Welsh Government. Non-Medical Prescribing in Wales, Guidance, Welsh Government. 2017; Cardiff. Available at: <http://www.awmsg.org/docs/awmsg/> (last accessed 08 July 2019).
10. Department of Health. Improving patients' access to medicines: A guide to implementing nurse and pharmacist independent prescribing within the NHS in England. 2006; DoH: London: April. Available at: <http://webarchive.nationalarchives.gov.uk/> (last accessed 08 July 2019).
11. Medicines Control Agency (MCA). Proposals for supplementary prescribing by nurses and pharmacists and proposed amendments to the prescription only medicines (human use) order 1997. 2002; London: MCA: MLX 284. Available at: <http://www.mhra.gov.uk/home/groups/comms-ic/documents/websiteresources/con2022567.pdf> (last accessed 08 July 2019).
12. Department of Health. Extending Independent Nurse Prescribing within the NHS in England: A guide for Implementation. 2002; DoH: London.
13. Department of Health. Optometrists to get Independent Prescribing Rights (Press Release). 2007; DOH: London.

- 1  
2  
3  
4  
5  
6  
7  
8  
9  
10  
11  
12  
13  
14  
15  
16  
17  
18  
19  
20  
21  
22  
23  
24  
25  
26  
27  
28  
29  
30  
31  
32  
33  
34  
35  
36  
37  
38  
39  
40  
41  
42  
43  
44  
45  
46  
47  
48  
49  
50  
51  
52  
53  
54  
55  
56  
57  
58  
59  
60
14. Department of Health. The Medicines Act 1968 and the Human Medicines Regulations (Amendment) Order. 2013; DOH: London. Available at: [http://www.legislation.gov.uk/uksi/2013/1855/pdfs/uksi\\_20131855\\_en.pdf](http://www.legislation.gov.uk/uksi/2013/1855/pdfs/uksi_20131855_en.pdf) (last accessed 08 July 2019).
15. National Health Service (NHS) England. Allied Health Professions Medicines Project. 2016; London: NHS England. Available at: <https://www.england.nhs.uk/ahp/med-project/> (last accessed 08 July 2019).
16. Courtenay M, Khanfer R, Harries-Huntly G, et al. Overview of the uptake and implementation of non-medical prescribing in Wales: a national survey. *BMJ Open*. 2017;7(9): e015313.
17. Welsh Government. Our plan for a primary care service for Wales up to March 2018. NHS Wales. 2015; February. Available at: [http://www.cpwales.org.uk/getattachment/The-Health-Landscape/NHS-Wales-Primary-Care-Strategy/150218primaryen-pdf0-\(Updated-March-2015\).pdf.aspx?lang=en-GB](http://www.cpwales.org.uk/getattachment/The-Health-Landscape/NHS-Wales-Primary-Care-Strategy/150218primaryen-pdf0-(Updated-March-2015).pdf.aspx?lang=en-GB) (last accessed 08 July 2019).
18. Wales Audit Office. A picture of primary care in Wales. [online] Auditor General for Wales. 2018. Available at: <http://www.assembly.wales/laid%20documents/agr-ld11520/agr-ld11520-e.pdf> (last accessed 08 July 2019).
19. The National Assembly for Wales. Inquiry into Primary Care: Clusters. Cardiff: Health, Social Care and Sport Committee. 2017; October. Available at: <http://www.assembly.wales/laid%20documents/cr-ld11226/cr-ld11226-e.pdf> (last accessed 08 July 2019).
20. Royal Pharmaceutical Society Wales. Your Care, Your Medicines: Pharmacy at the heart of patient-centered care, 2015. Available at: <https://www.rpharms.com/Portals/0/RPS%20document%20library/Open%20access/Publications/Your%20Care%20Your%20Medicines%20report.pdf> (last accessed 08 July 2019).
21. Hodson K, Deslandes R, Courtenay M. Pharmacist independent prescribers can make a significant contribution to antimicrobial stewardship. *The Pharmaceutical Journal*. [online]. 2017. Available at: [https://www.pharmaceutical-journal.com/your-rps/pharmacist-independent-prescribers-can-make-a-significant-contribution-to-antimicrobial-stewardship/20202780.article#fn\\_2](https://www.pharmaceutical-journal.com/your-rps/pharmacist-independent-prescribers-can-make-a-significant-contribution-to-antimicrobial-stewardship/20202780.article#fn_2) (last accessed 08 July 2019).
22. Deslandes, P. All Wales Therapeutics and Toxicology Centre (AWTTC) at CVUHB. 2018. Personal communication (conversation with Saeed Alghamdi), 16 May 2018
23. Prescribing and Primary Care Services. Prescribing Measures and their application. Leeds: Health and Social Care Information Centre. 2012. Available at: <http://webarchive.nationalarchives.gov.uk/20180307194416/http://content.digital.nhs.uk/media/10952/Prescribing-Measures/pdf/CHttpHandler.pdf> (last accessed 9 September 2018).
24. Welsh Government. Population estimates by local health boards and age. [online] [Stats.wales.gov.wales](http://stats.wales.gov.wales). 2018. Available at:

<https://statswales.gov.wales/Catalogue/Population-and-Migration/Population/Estimates/Local-Heal> (last accessed 08 July 2019).

25. Campbell, M. Framework for design and evaluation of complex interventions to improve health. *BMJ*. 2000; 321(7262), pp.694-696
26. Victora C, Habicht J, and Bryce J. Evidence-Based Public Health: Moving Beyond Randomized Trials. *American Journal of Public Health*. 2004; 94(3), pp.400-405
27. Bonell CP, Hargreaves J, Cousens S, et al. Alternatives to randomisation in the evaluation of public health interventions: design challenges and solutions. *Journal of Epidemiology & Community Health*. 2011; Jul 1;65(7):582-7.
28. Fretheim A, Håvelsrud K, MacLennan G, et al. The Effects of Mandatory Prescribing of Thiazides for Newly Treated, Uncomplicated Hypertension: Interrupted Time-Series Analysis. *PLoS Medicine*. 2007; 4(7), p.e232.
29. Hawton K, Bergen H, Simkin S, et al. Long-term effect of reduced pack sizes of paracetamol on poisoning deaths and liver transplant activity in England and Wales: interrupted time series analyses. *BMJ*. 2013; 346(feb071), pp. f403-f403.
30. Deslandes PN, Jenkins KS, Haines KE, et al. A change in the trend in dosulepin usage following the introduction of a prescribing indicator but not after two national safety warnings. *Journal of Clinical Pharmacy and Therapeutics*. 2016; 41(2), pp.224-228.
31. Cochrane Effective Practice and Organisation of Care (EPOC). Interrupted time series (ITS) analyses. 2017; Oxford: Available at: [https://www.google.com/epoc.cochrane.interrupted\\_time\\_series\\_analyses.doc](https://www.google.com/epoc.cochrane.interrupted_time_series_analyses.doc) (last accessed: 2 May 2019).
32. Field, A. *Discovering statistics using IBM SPSS statistics*. 2018; 5th ed. Los Angeles: [i5 pozostałych]: Sage edge.
33. Courtenay M. An overview of developments in nurse prescribing in the UK. *Nursing Standard*. 2018;33(1):40-44.
34. GPhC (General Pharmaceutical Council). Prescribers survey report. UK: London. 2016. Available at: [https://www.pharmacyregulation.org/sites/default/files/gphc\\_prescribers\\_survey\\_report.pdf](https://www.pharmacyregulation.org/sites/default/files/gphc_prescribers_survey_report.pdf) (last accessed 08 July 2019)
35. Latter S, Blenkinsopp A, Smit A, et al. Evaluation of nurse and pharmacist independent prescribing. Department of Health Policy Research Programme Project 016 0108 (October 2010): University of Southampton and Keele University. 2011; Available at: <https://eprints.soton.ac.uk/184777/3/ENPIPfullreport.pdf> (last accessed 08 July 2019).
36. Courtenay M, Carey N, Stenner K. An overview of non-medical prescribing across one strategic health authority: a questionnaire survey. *BMC Health Services Research*. 2012;12(1).
37. Department of Health. Review of Prescribing, Supply and Administration of Medicines. Final Report (Crown II Report). 1999; London: DOH.
38. Brennan S. North Wales facing GP 'recruitment crisis' leading doctor warns. [online] Daily Post Wales. 2017. Available at:

- 1  
2  
3  
4  
5  
6  
7  
8  
9  
10  
11  
12  
13  
14  
15  
16  
17  
18  
19  
20  
21  
22  
23  
24  
25  
26  
27  
28  
29  
30  
31  
32  
33  
34  
35  
36  
37  
38  
39  
40  
41  
42  
43  
44  
45  
46  
47  
48  
49  
50  
51  
52  
53  
54  
55  
56  
57  
58  
59  
60
- <https://www.dailypost.co.uk/news/north-wales-news/gp-surgeries-recruitment-crisis-jessup-13453024> (last accessed 08 July 2019).
39. Jones M. More than 8,000 people will be served by just three GPs as another North Wales surgery closes. [online] Daily Post Wales. 2017. Available at: <https://www.dailypost.co.uk/news/more-8000-people-served-just-13905020> (last accessed 08 July 2019).
40. Jessup E. GP shortage 'escalating crisis' warning. [online] BBC News. 2017. Available at: <https://www.bbc.co.uk/news/uk-wales-40876801> (last accessed 08 July 2019).
41. NHS Wales. Public Health Wales Observatory | Wales and its Local Health Boards: Demography Profile. [online]. 2017; Available at: <http://www.publichealthwalesobservatory.wales.nhs.uk/wales-local-health-boards-demography-profile> (last accessed 2 May 2019).
42. Welsh Government. Local Health Board comparisons of GP workforce by year. 2018; Available at: <https://statswales.gov.wales/Catalogue/Health-and-Social-Care/General-Medical-Services/localhealthboardcomparisonsofgpworkforce-by-year> (last accessed 2 May 2019).
43. Cooper RJ, Anderson C, Avery T, et al. Nurse and pharmacist supplementary prescribing in the UK--a thematic review of the literature. *Health Policy*. 2008; 85(3), pp. 277-292. doi: 10.1016/j.healthpol.2007.07.016.
44. Hacking, S. and Taylor, J. An evaluation of the scope and practice of Non-Medical Prescribing in the North West for NHS North West. 2010; Lancashire. NHS North West. Available at: [https://www.researchgate.net/profile/Suzanne\\_Hacking/publication/](https://www.researchgate.net/profile/Suzanne_Hacking/publication/) (last accessed 17 May 2018).
45. Ramsay CR, Matowe L, Grilli R, et al. Interrupted time series designs in health technology assessment: lessons from two systematic reviews of behaviour change strategies. *International Journal of Technology Assessment in Health Care*. 2003; 19(04), pp.613-623.
46. Bernal JL, Cummins S, Gasparrini A. Interrupted time series regression for the evaluation of public health interventions: a tutorial. *International Journal of Epidemiology*. 2016; 46(1), pp. 348-355. doi: 10.1093/ije/dyw098.

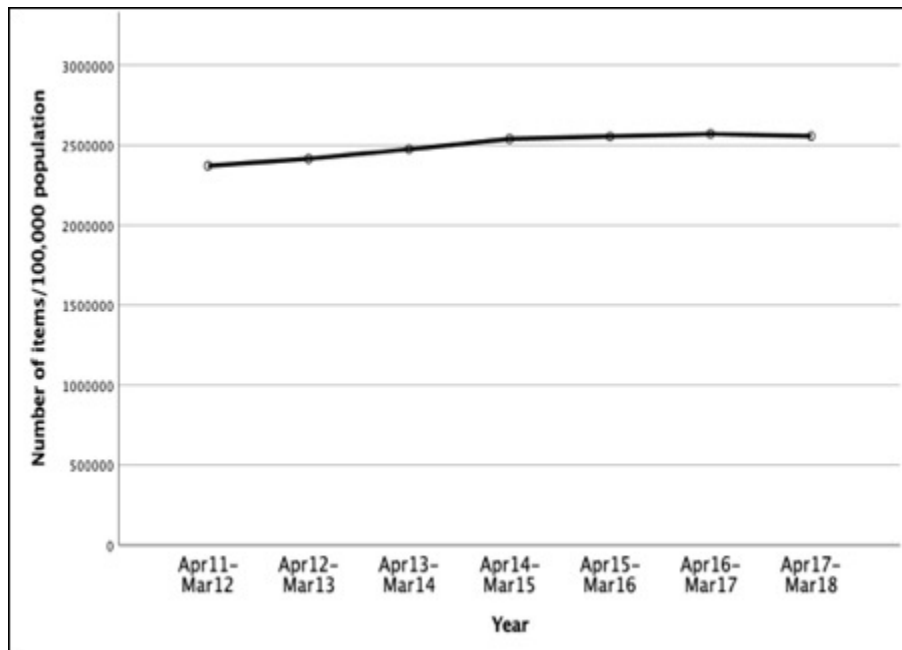

Figure 1 Trend of the total number of items per 100,000 population prescribed by all prescribers in primary care in Wales and dispensed in community pharmacies by year

38x27mm (300 x 300 DPI)

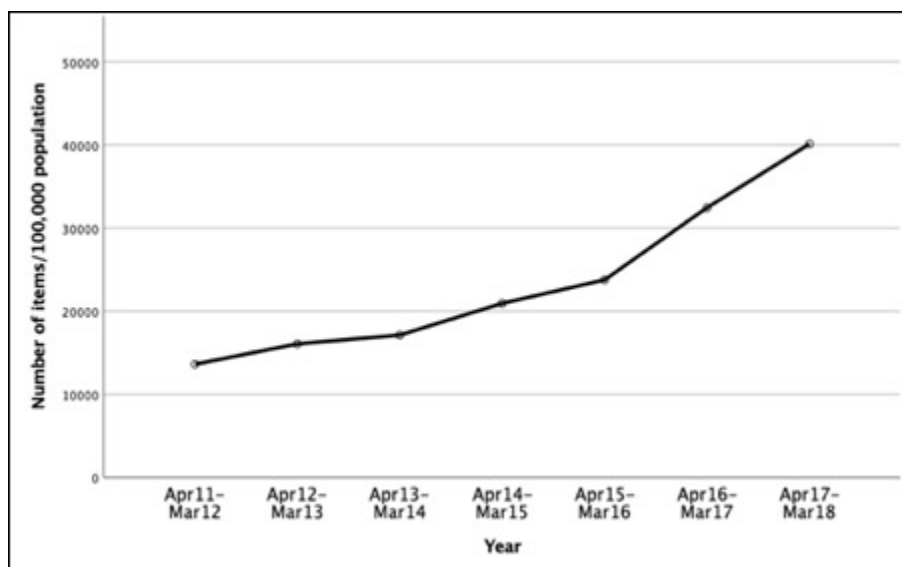

Figure 2 Trend of the total number of items per 100,000 population prescribed by NMIPs in primary care in Wales and dispensed in community pharmacies by year

38x23mm (300 x 300 DPI)

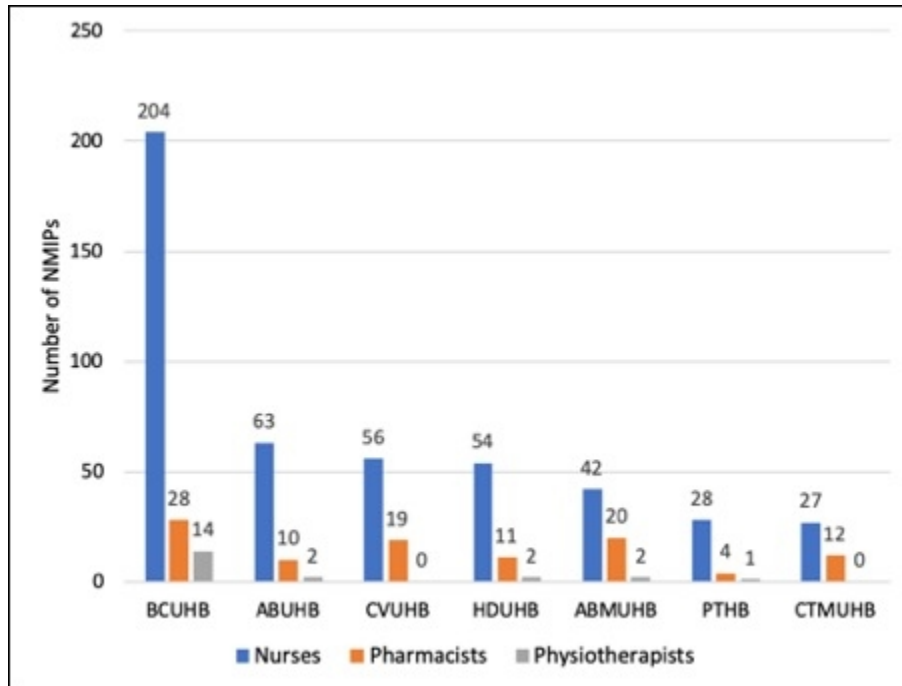

Figure 3 The total number of NMIPs (pharmacists, nurses and physiotherapists) who prescribed at least one item from April 2011 to March 2018 in primary care in Wales in different HBs  
 ABMUHB (Abertawe Bro Morgannwg University HB); ABUHB (Aneurin Bevan University HB); BCUHB (Betsi Cadwaladr University HB); CTMUHB (Cwm Taf Morgannwg University HB); CVUHB (Cardiff and Vale University HB); HDUHB (Hywel Dda University HB); PTHB (Powys Teaching HB)

38x28mm (300 x 300 DPI)

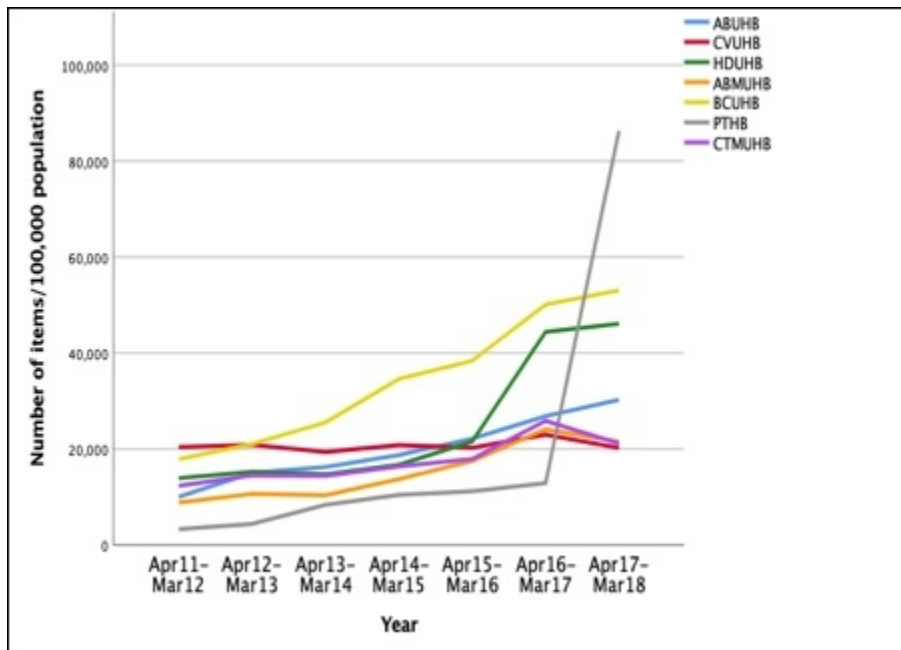

Figure 4 Trend of the total number of items/100,000 population prescribed by NMIPs in primary care in Wales and dispensed in community pharmacies in different HBs by year  
 ABMUHB (Abertawe Bro Morgannwg University HB); ABUHB (Aneurin Bevan University HB); BCUHB (Betsi Cadwaladr University HB); CTMUHB (Cwm Taf Morgannwg University HB); CVUHB (Cardiff and Vale University HB); HDUHB (Hywel Dda University HB); PTHB (Powys Teaching HB)

38x27mm (300 x 300 DPI)



# BMJ Open

## Prescribing trends over time by non-medical independent prescribers (NMIPs) in primary care settings across Wales (2011-2018): a secondary database analysis

|                                 |                                                                                                                                                                                                                                                                                                                                                                                                                                                                                                                                                                                                                                                                                                                                                                                                                                                       |
|---------------------------------|-------------------------------------------------------------------------------------------------------------------------------------------------------------------------------------------------------------------------------------------------------------------------------------------------------------------------------------------------------------------------------------------------------------------------------------------------------------------------------------------------------------------------------------------------------------------------------------------------------------------------------------------------------------------------------------------------------------------------------------------------------------------------------------------------------------------------------------------------------|
| Journal:                        | <i>BMJ Open</i>                                                                                                                                                                                                                                                                                                                                                                                                                                                                                                                                                                                                                                                                                                                                                                                                                                       |
| Manuscript ID                   | bmjopen-2019-036379.R1                                                                                                                                                                                                                                                                                                                                                                                                                                                                                                                                                                                                                                                                                                                                                                                                                                |
| Article Type:                   | Original research                                                                                                                                                                                                                                                                                                                                                                                                                                                                                                                                                                                                                                                                                                                                                                                                                                     |
| Date Submitted by the Author:   | 03-Jun-2020                                                                                                                                                                                                                                                                                                                                                                                                                                                                                                                                                                                                                                                                                                                                                                                                                                           |
| Complete List of Authors:       | Alghamdi, Saeed; Cardiff University, School of Pharmacy and Pharmaceutical Sciences<br>Hodson, Karen; Cardiff University, School of Pharmacy and Pharmaceutical Sciences<br>Deslandes, Paul; University Hospital Llandough, All Wales Therapeutics and Toxicology Centre, Academic Centre; University of South Wales - Trefforest Campus, School of Care Sciences<br>Gillespie, David; Centre for Trials Research, University of Cardiff<br>Haines, kath; University Hospital Llandough, All Wales Therapeutics and Toxicology Centre, Academic Centre<br>Hulme, Elliott ; Cardiff University, School of Pharmacy and Pharmaceutical Sciences<br>Courtenay, Molly; Cardiff University, School of Healthcare Sciences, College of Biomedical and Life Sciences<br>Deslandes, Rhian; Cardiff University, School of Pharmacy and Pharmaceutical Sciences |
| <b>Primary Subject Heading</b>: | General practice / Family practice                                                                                                                                                                                                                                                                                                                                                                                                                                                                                                                                                                                                                                                                                                                                                                                                                    |
| Secondary Subject Heading:      | Health services research                                                                                                                                                                                                                                                                                                                                                                                                                                                                                                                                                                                                                                                                                                                                                                                                                              |
| Keywords:                       | PRIMARY CARE                                                                                                                                                                                                                                                                                                                                                                                                                                                                                                                                                                                                                                                                                                                                                                                                                                          |
|                                 |                                                                                                                                                                                                                                                                                                                                                                                                                                                                                                                                                                                                                                                                                                                                                                                                                                                       |

SCHOLARONE™  
Manuscripts

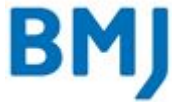

I, the Submitting Author has the right to grant and does grant on behalf of all authors of the Work (as defined in the below author licence), an exclusive licence and/or a non-exclusive licence for contributions from authors who are: i) UK Crown employees; ii) where BMJ has agreed a CC-BY licence shall apply, and/or iii) in accordance with the terms applicable for US Federal Government officers or employees acting as part of their official duties; on a worldwide, perpetual, irrevocable, royalty-free basis to BMJ Publishing Group Ltd ("BMJ") its licensees and where the relevant Journal is co-owned by BMJ to the co-owners of the Journal, to publish the Work in this journal and any other BMJ products and to exploit all rights, as set out in our [licence](#).

The Submitting Author accepts and understands that any supply made under these terms is made by BMJ to the Submitting Author unless you are acting as an employee on behalf of your employer or a postgraduate student of an affiliated institution which is paying any applicable article publishing charge ("APC") for Open Access articles. Where the Submitting Author wishes to make the Work available on an Open Access basis (and intends to pay the relevant APC), the terms of reuse of such Open Access shall be governed by a Creative Commons licence – details of these licences and which [Creative Commons](#) licence will apply to this Work are set out in our licence referred to above.

Other than as permitted in any relevant BMJ Author's Self Archiving Policies, I confirm this Work has not been accepted for publication elsewhere, is not being considered for publication elsewhere and does not duplicate material already published. I confirm all authors consent to publication of this Work and authorise the granting of this licence.

1  
2  
3  
4  
5  
6  
7

## Prescribing trends over time by non-medical independent prescribers (NMIPs) in primary care settings across Wales (2011-2018): a secondary database analysis

8  
9  
10  
11

Saeed S Alghamdi<sup>1</sup>, Karen L Hodson<sup>2</sup>, Kath Haines<sup>3</sup>, Paul Deslandes<sup>3,4</sup>, Molly Courtenay<sup>5</sup>, Elliott Hulme<sup>2</sup>, David Gillespie<sup>6</sup>, Rhian Deslandes<sup>2</sup>

- 12  
13  
14  
15  
16  
17  
18  
19  
20  
21  
22  
23  
24  
25  
26  
27  
28  
29
1. *School of Pharmacy and Pharmaceutical Sciences, Cardiff University, Redwood Building, King Edward VII Avenue, Cardiff, CF10 3NB, Wales, United Kingdom; e-mail: [alghamdiss@cardiff.ac.uk](mailto:alghamdiss@cardiff.ac.uk); telephone number: 00447879099427*
  2. *School of Pharmacy and Pharmaceutical Sciences, Cardiff University, Cardiff, Wales, United Kingdom*
  3. *All Wales Therapeutics and Toxicology Centre, Academic Centre, University Hospital Llandough, Cardiff, Wales, United Kingdom*
  4. *School of Care Sciences, University of South Wales, Treforest, Wales, United Kingdom*
  5. *School of Healthcare Sciences, College of Biomedical and Life Sciences, Cardiff University, Cardiff, Wales, United Kingdom*
  6. *Centre for Trials Research, Cardiff University, Cardiff, Wales, United Kingdom*

30  
31

**Word count: 3974 words**

32  
33  
34  
35  
36  
37  
38  
39  
40  
41  
42  
43  
44  
45  
46  
47  
48  
49  
50  
51  
52  
53  
54  
55  
56  
57  
58  
59  
60

**Key words:** Non-medical prescribing, independent prescribing, primary care, prescribing analysis.

## ABSTRACT

**Introduction** As of 2015, as part of the implementation of the Welsh Government Primary Care Plan and primary care clusters, the Welsh Government has encouraged non-medical healthcare professionals working in primary care to train as independent prescribers (IPs).

**Design** Retrospective secondary data analysis and Interrupted Time Series (ITS) analysis in order to compare prescribing by NMIPs pre and post-implementation of primary care clusters across Wales.

**Objectives** This research aimed to identify the number of non-medical independent prescribers (NMIPs) in primary care in Wales and describe their prescribing trend of items between 2011 and 2018, in order to compare their prescribing pattern before and after the implementation of primary care clusters for Wales.

**Results** Over the study period, 600 NMIPs (nurses n=474 and pharmacists n=104) had prescribed at least one item. The number of nurse IPs increased by 108% and pharmacists by 325% (pharmacists had the largest increase between July 2015 and March 2018). The number of items prescribed by NMIPs increased over time by an average of 1,380 per month (95% CI: 904 to 1855,  $p < 0.001$ ) after the implementation of primary care clusters compared to 496 (95% CI: 445 to 548,  $p < 0.001$ ) prior its implementation. Approximately one third of the items prescribed by NMIPs was within Betsi Cadwaladr University Health Board (HB) with only 4% in Powys Teaching HB.

**Conclusion** The number of NMIPs and their volume of prescribing in primary care in Wales has increased following the implementation of primary care clusters in 2015. This suggests that the Government's recommendations of utilising NMIPs in primary care have been implemented. Future studies should focus on efficiency and quality of prescribing by NMIPs in primary care.

## STRENGTHS AND LIMITATIONS OF THIS STUDY

- This is the first study that has used a secondary database analysis, which has provided insights and empirical findings on the prescribing pattern of medicines by non-medical independent prescribers (NMIPs) over time in primary care in Wales.
- The data provided via the CASPA software system was limited to the last seven years and only captured prescriptions that were dispensed in community pharmacies.
- The CASPA system was designed for financial reimbursement purposes for community pharmacies, which means that holding investigations at the level of patients or prescribers, such as stopping or changing patients' medications, as well as clinical safety issues or other prescribing activities, were not possible.
- The professions of NMIPs as pharmacist, nurse, physiotherapist or others were not identified on the prescriptions and, consequently, in the CASPA system.
- The ITS analysis has the strength of evaluating data at the whole population level, which allowed the researchers to evaluate the utilisation of NMIPs in primary care across all of Wales.

## INTRODUCTION

The right to prescribe medicines was traditionally restricted to physicians, dentists and veterinary surgeons[1]. Prescribing practice has changed over the last 50 years to involve not only physicians and dentists (medical prescribers) but also other health care professionals, known as non-medical prescribers. The adoption of non-medical prescribing fundamentally began in the USA in the 1960s[2] and has extended to the UK, Canada, New Zealand, Australia, and other European and African nations[3]. Beyond the UK, solely nurses and pharmacists have been granted the authority to prescribe medicines collaboratively (dependently) under a physician's supervision or independently from a limited lists of medicines[4-7]. The drive to extend the medicines prescribing mandate to non-medical healthcare professionals was related to a variety of aspects within every nation.

In the UK, non-medical prescribing was introduced as part of the National Health Service (NHS) plans, which intended to improve and modernise the health care system[8,9]. The aim of introducing non-medical prescribing was to enhance patient care and safety, improve patient access and choice of appropriate medicines for their conditions, use the already gained skills of health care professionals in the most effective way, and promote a more flexible teamwork environment in the NHS[10]. Pharmacists, nurses, optometrists and Allied Health Professionals can qualify as non-medical prescribers after completing an advanced prescribing training programme[9,10]. This programme lawfully allows these healthcare professionals to prescribe within their area of competence. such as that pharmacists and nurses can prescribe medicines, appliances, and wound dressings as either independent or supplementary prescribers within their clinical area of practice. Some NMIPs are limited to prescribe certain medications within their clinical of speciality, such as

1  
2  
3 optometrists who can only prescribe for eye conditions and surrounding tissues[9].  
4

5  
6 Independent prescribing is defined as 'prescribing by a practitioner (e.g. a  
7 doctor, dentist, nurse, or a pharmacist) responsible and accountable for the  
8 assessment of patients with undiagnosed or diagnosed conditions and for decisions  
9 about the clinical management required, including prescribing'[10]. Whereas,  
10 supplementary prescribing is a 'voluntary partnership between the responsible  
11 independent prescriber and a supplementary prescriber, to implement an agreed  
12 patient-specific clinical management plan with the patient's agreement, particularly but  
13 not only in relation to prescribing for a specific non-acute medical condition or health  
14 need affecting the patient'[11]. Non-medical independent prescribing was introduced  
15 in the UK in 2002 after a change in the legislation made by the UK Government  
16 allowing the first level registered nurses who have at least 3 years of experience to  
17 prescribe independently from a limited list of medicines[12]. In 2006, independent  
18 prescribing extended for qualified nurses and pharmacists who completed the  
19 necessary training to prescribe any medicines within their area of competence with  
20 few exceptions[10]. This was followed by the introduction of optometrist independent  
21 prescribing in 2007[13], and more recently, independent prescribing by Allied Health  
22 Professionals including podiatrists and physiotherapists independent prescribing in  
23 2013[14], and therapeutic radiographers independent prescribing in 2016[15]. The  
24 recent healthcare professionals who gained the prescribing authority in Wales were  
25 paramedics in 2019. In 2017, the estimated number of non-medical independent  
26 prescribers (NMIPs) in the UK was as follows: 30,000 nurse independent prescribers  
27 (IPs); 3,000 pharmacist IPs and 600 Allied Health Professionals IPs[16]. All NMIPs are  
28 responsible and accountable for their own prescribing and limiting their prescribing to  
29 their therapeutic area of expertise[9]. Moreover, these healthcare professionals are  
30  
31  
32  
33  
34  
35  
36  
37  
38  
39  
40  
41  
42  
43  
44  
45  
46  
47  
48  
49  
50  
51  
52  
53  
54  
55  
56  
57  
58  
59  
60

1  
2  
3 required to seek appropriate advice or referral if they lack the confidence to manage  
4 patients' conditions or prescribe the suitable medicines for their patients[9].  
5  
6

7  
8 In Wales, the NHS provides its services via three NHS Trusts and seven health  
9 boards (HBs). The seven HBs are Swansea Bay University HB (SBUHB), Cardiff and  
10 Vale University HB (CVUHB), Cwm Taf Morgannwg University HB (CTMUHB), Hywel  
11 Dda University HB (HDUHB), Powys Teaching HB (PTHB), Betsi Cadwaladr  
12 University HB (BCUHB) and Aneurin Bevan University HB (ABUHB). The SBUHB was  
13 formerly known as Abertawe Bro Morgannwg University HB (ABMUHB), having being  
14 renamed in 2019.  
15  
16  
17  
18  
19  
20  
21  
22

23  
24 Primary health care services are the initial point of care for patients in the NHS.  
25 In Wales, it has been estimated that around 90% of people's contact with the NHS is  
26 with primary care services, with General Practices the main point of contact[17]. In  
27 2016, there were 441 General Practices in Wales and 2,009 General Practitioners  
28 (GPs) (excluding, locums, retainers, and registrars)[18]. The Welsh Government and  
29 HBs have focused upon improving primary care services[17], and this has included  
30 the development of primary care clusters. Clusters comprise groups of adjacent  
31 general practices that have linked together to provide advanced medical services  
32 locally in order to relieve pressure on hospitals[19]. The aims of these clusters include  
33 improving patients' access to their medicines and information as well as the provision  
34 of advice and support to manage medicines. These clusters came into being in the  
35 last quarter of 2015[19]. Currently, there are 64 primary care clusters in Wales which  
36 provide services for a population of 30,000 to 50,000 patients per cluster[19]. In order  
37 to overcome GP shortages[20,21], these clusters are supported by high numbers of  
38 hospital pharmacists, nurses and other professionals. In addition, the Welsh  
39 Government and HBs have prioritised funding for new posts and training of other  
40  
41  
42  
43  
44  
45  
46  
47  
48  
49  
50  
51  
52  
53  
54  
55  
56  
57  
58  
59  
60



1  
2  
3 health care professionals, such as pharmacist and nurse IPs[17]. Consequently, the  
4  
5 number of non-medical prescribers in primary care has increased in recent years and  
6  
7 is expected to rise further[16,21].  
8  
9

10 Only one published study has investigated the implementation of non-medical  
11  
12 prescribing in Wales[16]. This study aimed to provide an overview of the  
13  
14 implementation and utilisation of non-medical prescribing in all health care sectors  
15  
16 through a national questionnaire survey. The results of this study indicated that the  
17  
18 majority of non-medical prescribers in Wales were based in secondary care settings.  
19  
20 Moreover, these researchers stated that the utilisation of non-medical prescribers  
21  
22 across Wales, particularly in primary care, was inconsistent and had not been  
23  
24 implemented in all services. In addition, it was suggested that there was a need to  
25  
26 investigate and recognise the development of primary care services in Wales, with  
27  
28 support required for non-medical prescribers[16].  
29  
30  
31  
32

33 The aim of this study was to identify the number of NMIPs in Wales and  
34  
35 describe their prescribing volume (from April 2011 to March 2018) as a whole, as well  
36  
37 as within the seven HBs, before and after the implementation of primary care clusters.  
38  
39 This is the first study in Wales to use data obtained through a national database to  
40  
41 review prescribing volume by NMIPs in primary care. No equivalent studies have been  
42  
43 published internationally.  
44  
45  
46  
47  
48  
49  
50  
51  
52  
53  
54  
55  
56  
57  
58  
59  
60

## METHODOLOGY

The study design was a retrospective secondary data analysis of monthly data for prescriptions issued by NMIPs in primary care in Wales and dispensed in community pharmacies, as well as the data on the number of NMIPs within primary care in Wales.

The number of NMIPs who prescribed each month and who prescribed at least one item from April 2011 to March 2018 was obtained through the NHS Wales Shared Services Partnership, Primary Care Services. Prescribing data were obtained from the Comparative Analysis System for Prescribing Audit (CASPA) software system (Version 5), provided by the NHS Wales Shared Services. Data were fully anonymised and recorded as part of routine practice, as such, the study did not require ethical approval. CASPA records all dispensed WP10 prescriptions (NHS Welsh prescriptions for use in primary care), to allow financial reimbursement to community pharmacies[9]. Whilst it is acknowledged that dispensing may not fully reflect prescribing, due to patients not taking their prescriptions to a pharmacy for dispensing, the impact of this is likely to be small. This is due to that the prescription charge for people in Wales was abolished in 2007 allowing all patients who were registered with their Welsh GPs to get their prescriptions dispensed from a pharmacy in Wales free of charge[22]. As a result, the impact of non-dispensed items would have been reduced by this policy, which also limits the financial burden to patients. Therefore, dispensing was used as a surrogate marker for prescribing in this study.

The number of items refers to each single item prescribed by a prescriber on a prescription form to a patient[23]. All recorded WP10 prescriptions issued by GPs and NMIPs in Wales and dispensed by community pharmacists from April 2011 to March 2018 were extracted and included in the study. The number of prescribed items by

1  
2  
3 NMIPs were extracted from the CASPA system on a monthly basis, the total number  
4 of items per 100,000 population (the population data in Wales as a whole and in each  
5 HB obtained from the Welsh Government Stats Wales[24]) was calculated in order to  
6 take the population into consideration. Percentages were calculated for the total  
7 number of prescribed items by NMIPs in each HB. The name of ABMUHB was used  
8 to illustrate the findings in this HB as this was its name over the study period.  
9

10  
11  
12 Although Randomised Controlled Trials (RCTs) are considered the gold standard  
13 method to evaluate longitudinal effects of interventions over time[25-27], they lack the  
14 ability to evaluate the already implemented service retrospectively[27]. Therefore,  
15 prescribing trend data were compared before and after the introduction of primary care  
16 clusters (the intervention) by using an interrupted time series (ITS) analysis. This  
17 analysis was performed using ordinary-least squares regression with Newey-West  
18 standard errors and a lag for the autocorrelation structure. The Cumby-Huizinga test  
19 for autocorrelation was examined to determine the appropriate autocorrelation  
20 structure to be accounted for in the model. The model included pre- and post-  
21 intervention trends, as well as a coefficient to examine a change in level immediately  
22 post-intervention. The parameter estimates are presented alongside 95% confidence  
23 intervals and p-values. The counterfactual trend (i.e. the trend in the absence of the  
24 intervention) was examined, and this was compared to the actual observed trend to  
25 calculate absolute and relative differences at the end of the observed period (March  
26 2018). Analysis was performed using the *itsa* command in Stata V16.0[28]. The  
27 findings were assumed significant at p value <0.05. Confidence intervals (CIs) were  
28 calculated in order to be 95% certain that the range of values contained the true mean  
29 of the data[29].  
30  
31  
32  
33  
34  
35  
36  
37  
38  
39  
40  
41  
42  
43  
44  
45  
46  
47  
48  
49  
50  
51  
52  
53  
54  
55  
56  
57

58 The Welsh Government plan[17] encouraged local HBs to prioritise funding and  
59  
60

1  
2  
3 development of primary care clusters in April 2015. However, the implementation of  
4 these clusters is the responsibility of each individual local HB and there are no  
5 definitive time points of their establishment. To accommodate this, the researchers  
6 engaged with the relevant stakeholders (e.g. policy makers and Chief Pharmaceutical  
7 Officer) to determine the appropriate time for the intervention phase. They agreed the  
8 intervention phase should be after six months of the provided funding by the  
9 Government to HBs, which means the October 2015, to allow for an appropriate time  
10 for each HB to train NMIPs.  
11  
12  
13  
14  
15  
16  
17  
18  
19  
20  
21

22 **Patient and public involvement** - This research was done without patient and public  
23 involvement. Patients were not invited to comment on the study design and were not  
24 consulted to develop patient relevant outcomes or interpret the results. Patients were  
25 not invited to contribute to the writing or editing of this document for readability or  
26 accuracy.  
27  
28  
29  
30  
31  
32  
33  
34  
35  
36  
37  
38  
39  
40  
41  
42  
43  
44  
45  
46  
47  
48  
49  
50  
51  
52  
53  
54  
55  
56  
57  
58  
59  
60

## RESULTS

### Trend of the total number of items prescribed by all prescribers

The total number of items prescribed by all health care professionals (GPs and non-medical prescribers) from April 2011 to March 2018 was 540,781,584 items (17,482,150 per 100,000 population). The total number of prescribed items per 100,000 population per year increased by 7.1% between 2011-2012 (n= 2,371,511) and 2014-2015 (n= 2,539,192) and increased by 0.7% between 2014-2015 (n= 2,539,192) and 2017-2018 (n= 2,556,784] (Figure 1).

### Trend of the total number of items prescribed by NMIPs

The total number of items prescribed by NMIPs in primary care in Wales between April 2011 and March 2018 was 5,088,405 items (n= 164,130 per 100,000 population). The number of items prescribed as a percentage of all items prescribed by all health care professionals (except items prescribed by dentists) increased from 0.57% in 2011-2012 to 1.7% in 2017-2018. As shown in Table 1 and Figure 2, dispensed prescriptions by NMIPs in primary care started at 31,756 and increased on average per month prior to the implementation of primary care clusters by 496 (95% CI: 445 to 548,  $p < 0.001$ ). There was no evidence to suggest a change in the level immediately following the implementation of primary care clusters in October 2015. However, following this implementation, there was an increase in dispensed prescriptions per month, relative to pre-implementation trends, of 1,380 on average (95% CI: 904 to 1855,  $p < 0.001$ ).

Table 1: Parameter estimates from the interrupted time series analysis examining the change in level and slope of dispensed prescriptions in primary care by NMIPs following the implementation of primary care clusters in October 2015 (N = 84 months)

| Variable                | Coefficient | Lower 95% CI | Upper 95% CI | p-value |
|-------------------------|-------------|--------------|--------------|---------|
| Intercept               | 31755.5     | 30208.3      | 33302.8      | <0.001  |
| Pre-intervention slope  | 496.3       | 444.8        | 547.8        | <0.001  |
| Level change            | 3023.4      | -2151.5      | 8198.2       | 0.248   |
| Post-intervention slope | 1379.7      | 904.4        | 1855.1       | <0.001  |

Assuming the pre-implementation trend would have continued in the absence of the introduction of primary care clusters, the expected number of dispensed prescriptions by NMIPs at the end of the observation period (March 2018) was 73,443 (95% CI: 70,260 to 76,627), and with the model predicting an expected number (in the presence of primary care clusters) of 117,859 (95% CI: 108,049 to 127,670), there was a 60% relative increase in the number of dispensed prescriptions by NMIPs following the implementation of primary care clusters over and above what would have been expected in the absence of such a scheme (95% CI: 46 to 75,  $p < 0.001$ ).

### The total number of NMIPs

Data obtained from the NHS Wales Shared Services Partnership shows that the total number of NMIPs who prescribed at least one item from April 2011 to March 2018 was 600 prescribers (474 nurses, 104 pharmacists, 21 physiotherapists and 1 with unknown profession). The number of NMIPs in each HB is illustrated in Figure 3. The number of prescribing NMIPs per month increased by approximately 140% between April 2011 (n=174) and March 2018 (n=414). Of those, the number of nurses increased from 158 in April 2011 to 328 in March 2018 (an increase of 108%). The number of pharmacists increased from 16 in April 2011 to 68 in March 2018 (an

1  
2  
3 increase of 325%), the largest increase was from July 2015 (n=20) to March 2018  
4  
5 (n=68) by 240%. In January 2015, the first physiotherapist IP started to prescribe with  
6  
7 the number increasing to 17 by March 2018.  
8  
9

### 10 11 **Trend of the total number of prescribed items by NMIPs in different HBs pre** 12 13 **and post-intervention** 14

15  
16  
17 Table 2 presents the total number of items prescribed by NMIPs, as well as the  
18  
19 number per 100,000 population and percentage of all items prescribed, per HB.  
20  
21 Approximately one third of the items prescribed by NMIPs was within BCUHB (Table  
22  
23 2) with only 4% in PTHB. Data by HBs are illustrated in Figure 4 and Figure 5, and it  
24  
25 can also be seen in the supplementary file.  
26  
27  
28  
29  
30  
31  
32  
33  
34  
35  
36  
37  
38  
39  
40  
41  
42  
43  
44  
45  
46  
47  
48  
49  
50  
51  
52  
53  
54  
55  
56  
57  
58  
59  
60

Table 2 Total number of items prescribed by NMIPs, as well as the number per 100,000 population and percentage of all items prescribed, per HB in primary care in Wales and dispensed in community pharmacies since April 2011 until March 2018

| Health Board  | Total number of items prescribed by NMIPs | % of the prescribed items by NMIPs in each HB* | Prescribed items by NMIPs per 100,000 population |
|---------------|-------------------------------------------|------------------------------------------------|--------------------------------------------------|
| <b>BCUHB</b>  | 1,711,949                                 | 33.64%                                         | 240,742.5                                        |
| <b>ABUHB</b>  | 834,879                                   | 16.41%                                         | 139,396.5                                        |
| <b>CVUHB</b>  | 711,805                                   | 13.99%                                         | 145,069.9                                        |
| <b>HDUHB</b>  | 686,166                                   | 13.48%                                         | 172,782.9                                        |
| <b>ABMUHB</b> | 573,624                                   | 11.27%                                         | 106,813.2                                        |
| <b>CTMUHB</b> | 371,315                                   | 7.30%                                          | 122,620.2                                        |
| <b>PTHB</b>   | 198,667                                   | 3.91%                                          | 137,000.6                                        |

**ABMUHB** (Abertawe Bro Morgannwg University HB); **ABUHB** (Aneurin Bevan University HB); **BCUHB** (Betsi Cadwaladr University HB); **CTMUHB** (Cwm Taf Morgannwg University HB); **CVUHB** (Cardiff and Vale University HB); **HDUHB** (Hywel Dda University HB); **PTHB** (Powys Teaching HB)

\* The percentage of the prescribed items by NMIPs in each HB was calculated based on the total number of items prescribed by NMIPs in all Wales



## DISCUSSION

### Statement of the principal findings

This study investigated the number and associated prescribing volume of NMIPs before and after the implementation of primary care clusters in Wales. The number of NMIPs has increased in primary care in Wales over the study period and the majority of them were nurses, followed by pharmacists, and physiotherapists. Interestingly, the database did not identify other health care professionals who have prescribing authorisation in Wales, including therapeutic radiographers, chiropodists and podiatrists, and optometrists[16].

The analysis of the prescribed number of items by NMIPs before and after the implementation of primary care clusters showed a 60% relative increase following the implementation of the primary care clusters in Wales. However, the prescribing of items by NMIPs was inconsistent across the seven HBs.

### Strengths and weaknesses

This is the first study that has used a secondary database analysis, which has provided insights and empirical findings on the prescribing pattern of medicines by non-medical independent prescribers (NMIPs) over time in primary care in Wales. Although this study has achieved its aim and objectives, it has a number of limitations. Firstly, the data provided via the CASPA software system was limited to the last seven years. Secondly, this system was designed for financial reimbursement purposes for community pharmacies, which means that holding investigations at the level of patients or prescribers, such as stopping or changing patients' medications, as well as clinical safety issues or other prescribing activities, were not possible. In addition, this

1  
2  
3 system only captured NHS prescriptions that were dispensed in community  
4 pharmacies. Therefore, prescriptions issued by those prescribers that have not been  
5 dispensed as well as private prescriptions that have been prescribed by NMIPs, such  
6 as optometrists, were not captured by the system. Finally, the professions of NMIPs  
7 as pharmacist, nurse, physiotherapist or other were not identified on the prescriptions  
8 and, consequently, in the CASPA system. The ITS analysis may have the limitation  
9 of the presence of unknown confounding variables, which are outside of the  
10 researcher's control, that may have happened at the same time of the intervention and  
11 this leads to the difficulty of establishing causal effects[30]. However, this analysis has  
12 the strength of evaluating data at the whole population level[31], which allowed the  
13 researchers to evaluate the utilisation of NMIPs in primary care across all of Wales.  
14  
15  
16  
17  
18  
19  
20  
21  
22  
23  
24  
25  
26  
27  
28  
29

### 30 **Comparison with other studies**

31  
32  
33 The increase in the number of NMIPs in primary care in Wales may suggest  
34 that the primary care sector has recognised the skills of these practitioners, improving  
35 the skill-mix in this sector, and hopefully reducing the pressure on GPs i.e. the benefits  
36 described in the second Crown Report[32]. Since the last quarter of 2015, the increase  
37 in the percentage of pharmacist IPs was higher than the increase in the percentage of  
38 nurse IPs (325% vs 108%). This could be explained by the implementation of the  
39 Welsh Government Plan[17], introduction of primary care clusters[19], and the  
40 shortage of GPs in Wales, particularly in BCUHB[15,32,33,34]. All of these factors  
41 may have contributed to recruitment of more pharmacist IPs[17]. Pharmacist  
42 independent prescribing is a new role for pharmacists within clusters, with many  
43 secondary care based pharmacist IPs moving into these positions[21]. This may lead  
44 to a shortage of pharmacists within secondary care and has highlighted the need for  
45  
46  
47  
48  
49  
50  
51  
52  
53  
54  
55  
56  
57  
58  
59  
60

1  
2  
3 a pharmacy workforce plan for Wales.  
4  
5

6 Although the number of nurse IPs is much greater than pharmacist IPs, they only  
7 represent 5% of the nursing workforce[35], while pharmacist IPs represent 7% of the  
8 pharmacist profession[36]. The fact that there are more nurse IPs than other  
9 professions is in line with the findings of other studies that have investigated the  
10 implementation of non-medical prescribing in England[33,37] and Wales[16].  
11 Therapeutic radiographer IPs are based within secondary or tertiary care settings in  
12 Wales and therefore, they would be unlikely to be included in the database. However,  
13 the other professions, such as chiropodists, podiatrists and optometrists, could  
14 potentially be working in primary care settings but do not appear to have issued NHS  
15 prescriptions as they could have been prescribing medications for their patients within  
16 private hospitals, at point of care or not using their prescribing qualification. If they  
17 were not using their prescribing qualification, this may suggest that HBs need to  
18 investigate the reasons for that in order to prevent wasting the time and expenses  
19 incurred for training and failure to deliver an improved service to patients.  
20  
21  
22  
23  
24  
25  
26  
27  
28  
29  
30  
31  
32  
33  
34  
35  
36  
37  
38  
39

40 The increase in the number of NMIPs, particularly pharmacist IPs, may explain  
41 the increased rate of prescribing of medicines by these practitioners over the same  
42 period. The high number of prescribed items by NMIPs in BCUHB (34%) compared to  
43 other HBs could be explained by the high number of NMIPs in BCUHB (246 NMIPs).  
44 It is evident that the utilisation of NMIPs is inconsistent across the seven HBs in Wales,  
45 which supports previous research[16]. BCUHB and HDUHB represent the largest  
46 geographical areas in Wales compared to other HBs[38], but have the lowest number  
47 of GPs per 10,000 population (6.1 and 5.8, retrospectively)[39]. The low number of  
48 GPs in these HBs could be related to issues of recruitment, as well as the difficulty in  
49  
50  
51  
52  
53  
54  
55  
56  
57  
58  
59  
60

1  
2  
3 keeping those who are already employed in their positions[34,40]. The shortage of  
4  
5 GPs in these HBs, may explain the early adoption of non-medical independent  
6  
7 prescribing. Although PTHB showed the lowest number of items prescribed by NMIPs  
8  
9 over the study period, it is the smallest geographical area in Wales that has the lowest  
10  
11 number of populations compared to other HBs. An equivalent increase in the number  
12  
13 of prescribers and items would therefore produce a bigger percentage change than in  
14  
15 a larger HB. However, the largest increase in the trend of the prescribing items in this  
16  
17 HB over the last two years of the study period may be explained by the increase in the  
18  
19 number of NMIPs. Moreover, PTHB only has primary care services, so whilst other  
20  
21 HBs may have been training IPs in both primary and secondary care settings, the  
22  
23 focus in PTHB would have been primary care only, which may have resulted in a  
24  
25 greater change. However, due to the nature of the database used, it was not possible  
26  
27 to investigate this further and this could be the focus of future work.  
28  
29  
30  
31  
32  
33

### 34 **The meaning of the study: possible explanations and implications for clinicians** 35 **and policymakers** 36 37 38 39

40 The findings of this study showed inconsistency in terms of the implementation  
41  
42 of the NMIPs' services between HBs in primary care in Wales, particularly after the  
43  
44 primary care clusters' implementation. Although there is a lack of evidence with  
45  
46 regards to the reasons and barriers behind this, some reasons that may have  
47  
48 contributed to lower utilisation of this service in some HBs may include the lack of  
49  
50 funding[16, 37, 41, 42] and lack of a plan or strategy to develop this service[37].  
51  
52 However, these studies are outdated given the pace of change as well as not been  
53  
54 conducted in Wales in particular, which may not reflect recent practice and policies.  
55  
56 Due to the lack of evidence regarding the impact of these barriers on the  
57  
58  
59  
60

1  
2  
3 implementation of non-medical independent prescribing in each HB, further research  
4 is required to investigate this matter. This study provides the initial evidence for such  
5 research, as well as providing the opportunity to share learning among HBs.  
6  
7  
8  
9

### 10 11 **Unanswered questions and future studies**

12  
13  
14 This study provides a research agenda for further investigation to examine  
15 questions related to efficiency, quality of prescribing, cost effectiveness, and improved  
16 access to services provided by NMIPs. With the presence of some variety and  
17 inconsistency in the prescribing trend of NMIPs across different HBs, this provides an  
18 opportunity to share the knowledge on advanced and novel services provided by these  
19 prescribers as well as to investigate the reasons behind it.  
20  
21  
22  
23  
24  
25  
26  
27  
28

### 29 **CONCLUSION**

30  
31  
32 The number of NMIPs and their prescribing trends of medicines increased in all  
33 Wales, as well as in the majority of HBs, particularly the number of pharmacist IPs  
34 since the implementation of primary care clusters. This could be related to the  
35 implementation of the Welsh Government Plan[17] and the introduction of primary  
36 care clusters. The findings of this study may suggest that the increased number of  
37 NMIPs in the primary care sector in Wales over time may help to reduce the pressure  
38 on GPs and improve the skill-mix across different therapeutic areas. This aligns with  
39 the main reasons for the implementation of non-medical prescribing in the UK, as  
40 outlined in the second Crown Report[32]. Future studies should focus on efficiency  
41 and quality of prescribing by NMIPs in primary care.  
42  
43  
44  
45  
46  
47  
48  
49  
50  
51  
52  
53  
54  
55  
56  
57  
58  
59  
60

## Acknowledgments

We would like to thank All Wales Therapeutics and Toxicology Centre (AWTTC) in Cardiff who granted the permission for the team to access the CASPA system and extract the data. Moreover, we are grateful to Taif University and the Government of Saudi Arabia represented by the Saudi Arabian Cultural Bureau (SACB) in the United Kingdom for funding the lead author in order to conduct this project.

For peer review only

1  
2  
3 **CONTRIBUTORSHIP STATEMENT** - SA made a substantial contribution to the  
4 conception and design of the work; the acquisition, analysis and interpretation of data;  
5 and drafting of the work. RD and KLH made a substantial contribution to the design of  
6 the work, acquisition, analysis, and interpretation of data. PD made a substantial  
7 contribution to data acquisition, analysis and interpretation. KH made a substantial  
8 contribution to the data acquisition and interpretation of data. DG made a substantial  
9 contribution to data analysis and interpretation. MC made a substantial contribution to  
10 the design of the work and interpretation of data. EH made a substantial contribution  
11 to data analysis and interpretation. All authors critically revised drafts of the work  
12 and approved the final version to be published and agree to be accountable for all  
13 aspects of the work in ensuring that questions related to the accuracy or integrity of  
14 any part of the work are appropriately investigated and resolved.  
15  
16  
17  
18  
19  
20  
21  
22  
23  
24

25 **Competing interests** - All authors the ICMJE uniform disclosure form  
26 at [www.icmje.org/coi\\_disclosure.pdf](http://www.icmje.org/coi_disclosure.pdf) and declare: no support from any organisation  
27 for the submitted work; no financial relationships with any organisations that might  
28 have an interest in the submitted work in the previous three years, no other  
29 relationships or activities that could appear to have influenced the submitted work.  
30  
31  
32  
33

34 **Funding** – the only funding for this study was received from Taif University, Kingdom  
35 of Saudi Arabia (KSA) represented by the Saudi Arabian Cultural Bureau (SACB) in  
36 the United Kingdom for the lead author to do this research as a part of his PhD study.  
37  
38  
39  
40

41 **DATA SHARING STATEMENT** - No additional data available  
42

43 **Transparency declaration** - The lead author affirms that the manuscript is an honest,  
44 accurate, and transparent account of the study being reported; that no important  
45 aspects of the study have been omitted; and that any discrepancies from the study as  
46 planned (and, if relevant, registered) have been explained.  
47  
48  
49  
50

51 **INTEGRITY OF THE DATA AND ACCURACY OF THE DATA ANALYSIS** - All  
52 authors had full access to all the data (including statistical reports and tables) in the  
53 study and can take responsibility for the integrity of the data and the accuracy of the  
54 data analysis.  
55  
56  
57  
58

59 **Ethics approval** - No ethical approval required.  
60

## REFERENCES

1. Department of Health. Medicines Act 1968. 1968; DOH: London. Available at: <http://www.legislation.gov.uk/ukpga/1968/67> (last accessed 08 July 2019).
2. Craig E. A Review of Prescriptive Authority for Nurse Practitioners. *The Journal of Perinatal & Neonatal Nursing*. 1996;10(1):29-35.
3. Kroezen M, van Dijk L, Groenewegen P, et al. Nurse prescribing of medicines in Western European and Anglo-Saxon countries: a systematic review of the literature. *BMC Health Services Research*. 2011;11(1).
4. McBane S, Dopp A, Abe A, et al. Collaborative Drug Therapy Management and Comprehensive Medication Management—2015. *Pharmacotherapy: The Journal of Human Pharmacology and Drug Therapy*. 2015;35(4): e39-e50.
5. Alberta College of Pharmacists. Guide to Receiving Additional Prescribing Authorization. 2013; Alberta: 2<sup>nd</sup> edition, January. Available at: <https://pharmacists.ab.ca/sites/default/files/APAGuide.pdf> (last accessed 08 July 2019).
6. Raghunandan R, Tordoff J, Smith A. Non-medical prescribing in New Zealand: an overview of prescribing rights, service delivery models and training. *Therapeutic Advances in Drug Safety*. 2017;8(11):349-360.
7. Dunn S, Cashin A, Buckley T, et al. Nurse practitioner prescribing practice in Australia. *Journal of the American Academy of Nurse Practitioners*. 2010;22(3):150-155.
8. Department of Health. The NHS Plan: A plan for investment. A plan for reform. 2000; DOH: London: July. Available at: [http://webarchive.nationalarchives.gov.uk/20130124064356/http://www.dh.gov.uk/prod\\_consum\\_dh/groups/dh\\_digitalassets/@dh/@en/@ps/documents/digit\\_118522.pdf](http://webarchive.nationalarchives.gov.uk/20130124064356/http://www.dh.gov.uk/prod_consum_dh/groups/dh_digitalassets/@dh/@en/@ps/documents/digit_118522.pdf) (last accessed 08 July 2019).
9. Welsh Government. Non-Medical Prescribing in Wales, Guidance, Welsh Government. 2017; Cardiff. Available at: <http://www.awmsg.org/docs/awmsg/> (last accessed 08 July 2019).
10. Department of Health. Improving patients' access to medicines: A guide to implementing nurse and pharmacist independent prescribing within the NHS in England. 2006; DoH: London: April. Available at: <http://webarchive.nationalarchives.gov.uk/> (last accessed 08 July 2019).
11. Medicines Control Agency (MCA). Proposals for supplementary prescribing by nurses and pharmacists and proposed amendments to the prescription only medicines (human use) order 1997. 2002; London: MCA: MLX 284. Available at: <http://www.mhra.gov.uk/home/groups/comms-ic/documents/websiteresources/con2022567.pdf> (last accessed 08 July 2019).
12. Department of Health. Extending Independent Nurse Prescribing within the NHS in England: A guide for Implementation. 2002; DoH: London.
13. Department of Health. Optometrists to get Independent Prescribing Rights (Press Release). 2007; DOH: London.



14. Department of Health. The Medicines Act 1968 and the Human Medicines Regulations (Amendment) Order. 2013; DOH: London. Available at: [http://www.legislation.gov.uk/ukxi/2013/1855/pdfs/ukxi\\_20131855\\_en.pdf](http://www.legislation.gov.uk/ukxi/2013/1855/pdfs/ukxi_20131855_en.pdf) (last accessed 08 July 2019).
15. National Health Service (NHS) England. Allied Health Professions Medicines Project. 2016; London: NHS England. Available at: <https://www.england.nhs.uk/ahp/med-project/> (last accessed 08 July 2019).
16. Courtenay M, Khanfer R, Harries-Huntly G, et al. Overview of the uptake and implementation of non-medical prescribing in Wales: a national survey. *BMJ Open*. 2017;7(9): e015313.
17. Welsh Government. Our plan for a primary care service for Wales up to March 2018. NHS Wales. 2015; February. Available at: [http://www.cpwales.org.uk/getattachment/The-Health-Landscape/NHS-Wales-Primary-Care-Strategy/150218primaryen-pdf0-\(Updated-March-2015\).pdf.aspx?lang=en-GB](http://www.cpwales.org.uk/getattachment/The-Health-Landscape/NHS-Wales-Primary-Care-Strategy/150218primaryen-pdf0-(Updated-March-2015).pdf.aspx?lang=en-GB) (last accessed 08 July 2019).
18. Wales Audit Office. A picture of primary care in Wales. [online] Auditor General for Wales. 2018. Available at: <http://www.assembly.wales/laid%20documents/agr-ld11520/agr-ld11520-e.pdf> (last accessed 08 July 2019).
19. The National Assembly for Wales. Inquiry into Primary Care: Clusters. Cardiff: Health, Social Care and Sport Committee. 2017; October. Available at: <http://www.assembly.wales/laid%20documents/cr-ld11226/cr-ld11226-e.pdf> (last accessed 08 July 2019).
20. Royal Pharmaceutical Society Wales. Your Care, Your Medicines: Pharmacy at the heart of patient-centered care, 2015. Available at: <https://www.rpharms.com/Portals/0/RPS%20document%20library/Open%20access/Publications/Your%20Care%20Your%20Medicines%20report.pdf> (last accessed 08 July 2019).
21. Hodson K, Deslandes R, Courtenay M. Pharmacist independent prescribers can make a significant contribution to antimicrobial stewardship. *The Pharmaceutical Journal*. [online]. 2017. Available at: [https://www.pharmaceutical-journal.com/your-rps/pharmacist-independent-prescribers-can-make-a-significant-contribution-to-antimicrobial-stewardship/20202780.article#fn\\_2](https://www.pharmaceutical-journal.com/your-rps/pharmacist-independent-prescribers-can-make-a-significant-contribution-to-antimicrobial-stewardship/20202780.article#fn_2) (last accessed 08 July 2019).
22. The Welsh Government. National Health Service (Free Prescriptions and Charges for Drugs and Appliances) (Wales) Regulations. [online] *Legislation.gov.uk*. 2007. Available at: <http://www.legislation.gov.uk/wsi/2007/121/made> (last accessed 24 April 2020).
23. NHS, the Information Centre for Health and Social Care. Prescribing and Primary Care Services, Prescribing Measures and their application. Leeds: Health and Social Care Information Centre. 2012. Available at: <https://webarchive.nationalarchives.gov.uk/20180307194416/http://content.digital.nhs.uk/media/10952/Prescribing-Measures/pdf/CHttpHandler.pdf> (last accessed 12 April 2020).

- 1  
2  
3  
4  
5  
6  
7  
8  
9  
10  
11  
12  
13  
14  
15  
16  
17  
18  
19  
20  
21  
22  
23  
24  
25  
26  
27  
28  
29  
30  
31  
32  
33  
34  
35  
36  
37  
38  
39  
40  
41  
42  
43  
44  
45  
46  
47  
48  
49  
50  
51  
52  
53  
54  
55  
56  
57  
58  
59  
60
24. Welsh Government. Population estimates by local health boards and age. [online] Statswales.gov.wales. 2018. Available at: <https://statswales.gov.wales/Catalogue/Population-and-Migration/Population/Estimates/Local-Health-Boards/populationestimates-by-lhb-age> (last accessed 12 April 2020).
  25. Campbell, M. Framework for design and evaluation of complex interventions to improve health. *BMJ*. 2000; 321(7262), pp.694-696
  26. Victora C, Habicht J, and Bryce J. Evidence-Based Public Health: Moving Beyond Randomized Trials. *American Journal of Public Health*. 2004; 94(3), pp.400-405
  27. Bonell CP, Hargreaves J, Cousens S, et al. Alternatives to randomisation in the evaluation of public health interventions: design challenges and solutions. *Journal of Epidemiology & Community Health*. 2011; Jul 1;65(7):582-7.
  28. Linden A. Conducting interrupted time-series analysis for single-and multiple-group comparisons. *The Stata Journal*. 2015 Jun;15(2):480-500.
  29. Field, A. *Discovering statistics using IBM SPSS statistics*. 2018; 5th ed. Los Angeles: [i5 pozostałych]: Sage edge.
  30. Ramsay CR, Matowe L, Grilli R, et al. Interrupted time series designs in health technology assessment: lessons from two systematic reviews of behaviour change strategies. *International Journal of Technology Assessment in Health Care*. 2003; 19(04), pp.613-623.
  31. Bernal JL, Cummins S, Gasparrini A. Interrupted time series regression for the evaluation of public health interventions: a tutorial. *International Journal of Epidemiology*. 2016; 46(1), pp. 348-355. doi: 10.1093/ije/dyw098.
  32. Department of Health. Review of Prescribing, Supply and Administration of Medicines. Final Report (Crown II Report). 1999; London: DOH.
  33. Courtenay M, Carey N, Stenner K. An overview of non-medical prescribing across one strategic health authority: a questionnaire survey. *BMC Health Services Research*. 2012;12(1).
  34. Brennan S. North Wales facing GP 'recruitment crisis' leading doctor warns. [online] Daily Post Wales. 2017. Available at: <https://www.dailypost.co.uk/news/north-wales-news/gp-surgeries-recruitment-crisis-jessup-13453024> (last accessed 08 July 2019).
  35. Courtenay M. An overview of developments in nurse prescribing in the UK. *Nursing Standard*. 2018;33(1):40-44.
  36. GPhC (General Pharmaceutical Council). Prescribers survey report. UK: London. 2016. Available at: [https://www.pharmacyregulation.org/sites/default/files/gphc\\_prescribers\\_survey\\_report.pdf](https://www.pharmacyregulation.org/sites/default/files/gphc_prescribers_survey_report.pdf) (last accessed 08 July 2019)
  37. Latter S, Blenkinsopp A, Smit A, et al. Evaluation of nurse and pharmacist independent prescribing. Department of Health Policy Research Programme Project 016 0108 (October 2010): University of Southampton and Keele University. 2011; Available at: <https://eprints.soton.ac.uk/184777/3/ENPIPfullreport.pdf> (last accessed 08 July 2019).

- 1  
2  
3  
4  
5  
6  
7  
8  
9  
10  
11  
12  
13  
14  
15  
16  
17  
18  
19  
20  
21  
22  
23  
24  
25  
26  
27  
28  
29  
30  
31  
32  
33  
34  
35  
36  
37  
38  
39  
40  
41  
42  
43  
44  
45  
46  
47  
48  
49  
50  
51  
52  
53  
54  
55  
56  
57  
58  
59  
60
38. NHS Wales. Public Health Wales Observatory | Wales and its Local Health Boards: Demography Profile. [online]. 2017; Available at: <http://www.publichealthwalesobservatory.wales.nhs.uk/wales-local-health-boards-demography-profile> (last accessed 2 May 2019).
  39. Welsh Government. Local Health Board comparisons of GP workforce by year. 2018; Available at: <https://statswales.gov.wales/Catalogue/Health-and-Social-Care/General-Medical-Services/localhealthboardcomparisonsofgpworkforce-by-year> (last accessed 2 May 2019).
  40. Jones M. More than 8,000 people will be served by just three GPs as another North Wales surgery closes. [online] Daily Post Wales. 2017. Available at: <https://www.dailypost.co.uk/news/more-8000-people-served-just-13905020> (last accessed 08 July 2019).
  41. Cooper RJ, Anderson C, Avery T, et al. Nurse and pharmacist supplementary prescribing in the UK--a thematic review of the literature. *Health Policy*. 2008; 85(3), pp. 277-292. doi: 10.1016/j.healthpol.2007.07.016.
  42. Hacking S. and Taylor J. An evaluation of the scope and practice of Non-Medical Prescribing in the North West for NHS North West. 2010; Lancashire. NHS North West. Available at: [https://www.researchgate.net/profile/Suzanne\\_Hacking/publication/](https://www.researchgate.net/profile/Suzanne_Hacking/publication/) (last accessed 17 May 2018).

1  
2  
3  
4  
5  
6  
7  
8  
9  
10  
11  
12  
13  
14  
15  
16  
17  
18  
19  
20  
21  
22  
23  
24  
25  
26  
27  
28  
29  
30  
31  
32  
33  
34  
35  
36  
37  
38  
39  
40  
41  
42  
43  
44  
45  
46  
47  
48  
49  
50  
51  
52  
53  
54  
55  
56  
57  
58  
59  
60

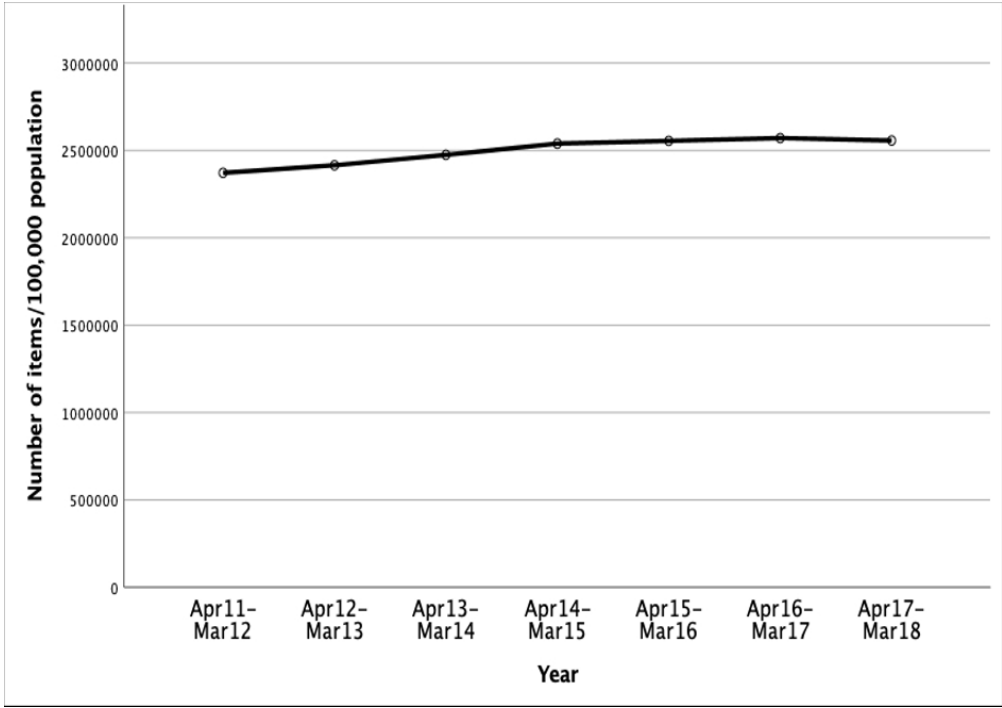

Figure 1 Trend of the total number of items per 100,000 population prescribed by all prescribers in primary care in Wales and dispensed in community pharmacies by year

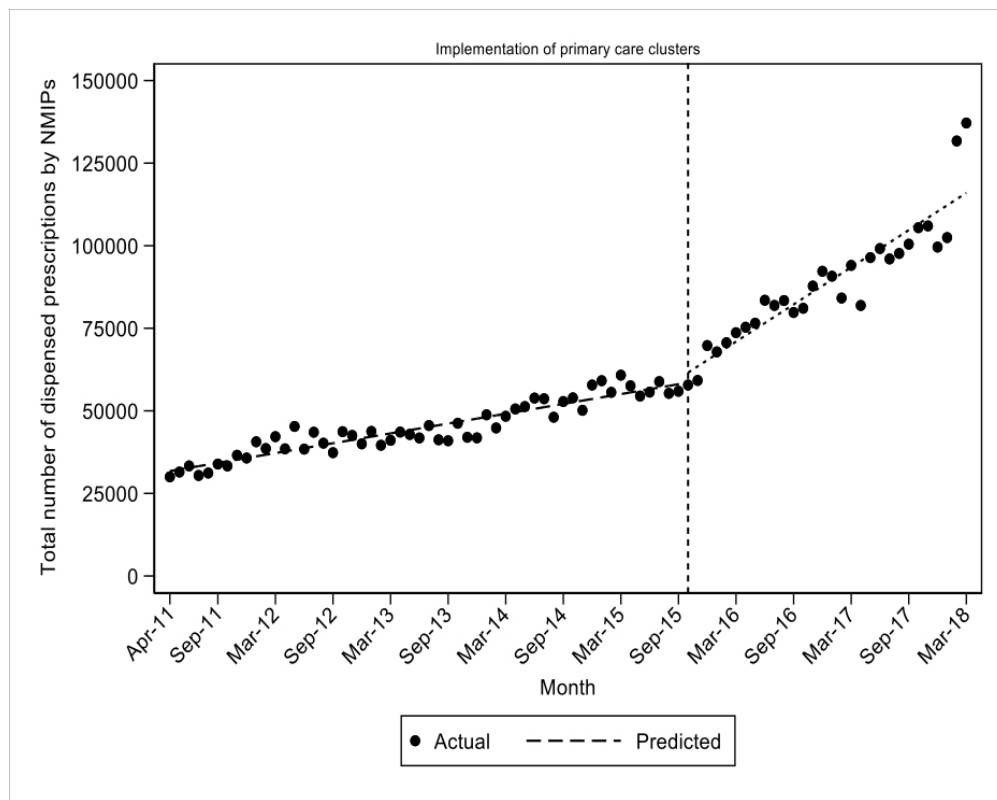

Figure 2 Observed and predicted dispensed prescriptions in primary care by NMIPs prior to and following the implementation of primary care clusters in October 2015 (All Wales)

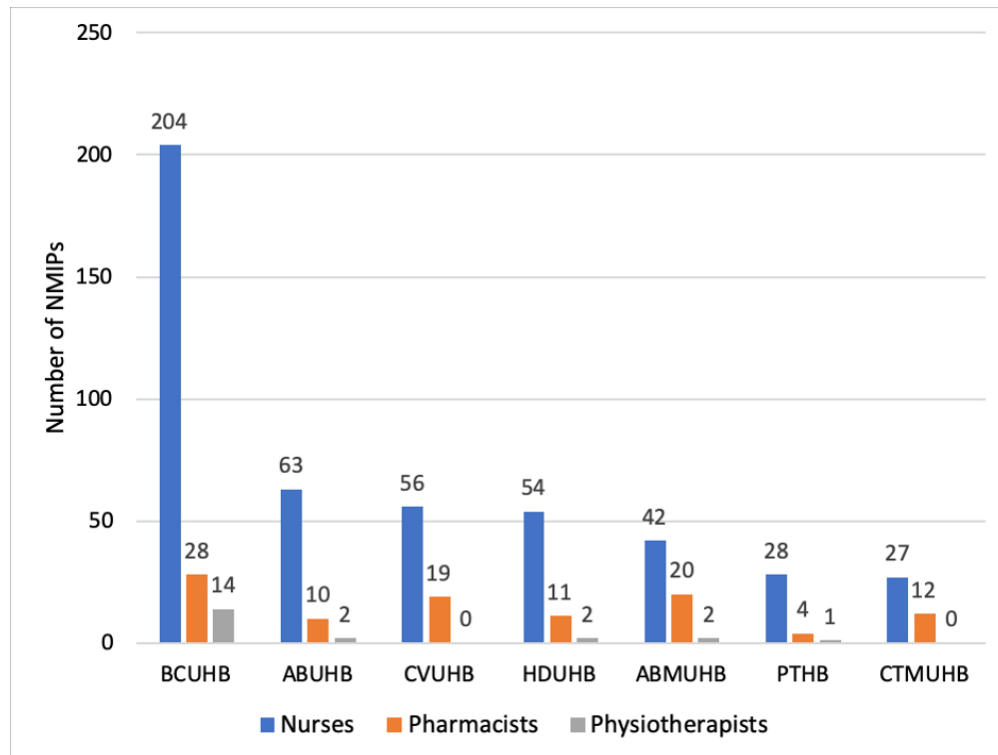

Figure 3 The total number of NMIPs (pharmacists, nurses and physiotherapists) who prescribed at least one item from April 2011 to March 2018 in primary care in Wales in different HBs

\*ABMUHB (Abertawe Bro Morgannwg University HB); ABUHB (Aneurin Bevan University HB); BCUHB (Betsi Cadwaladr University HB); CTMUHB (Cwm Taf Morgannwg University HB); CVUHB (Cardiff and Vale University HB); HDUHB (Hywel Dda University HB); PTHB (Powys Teaching HB)

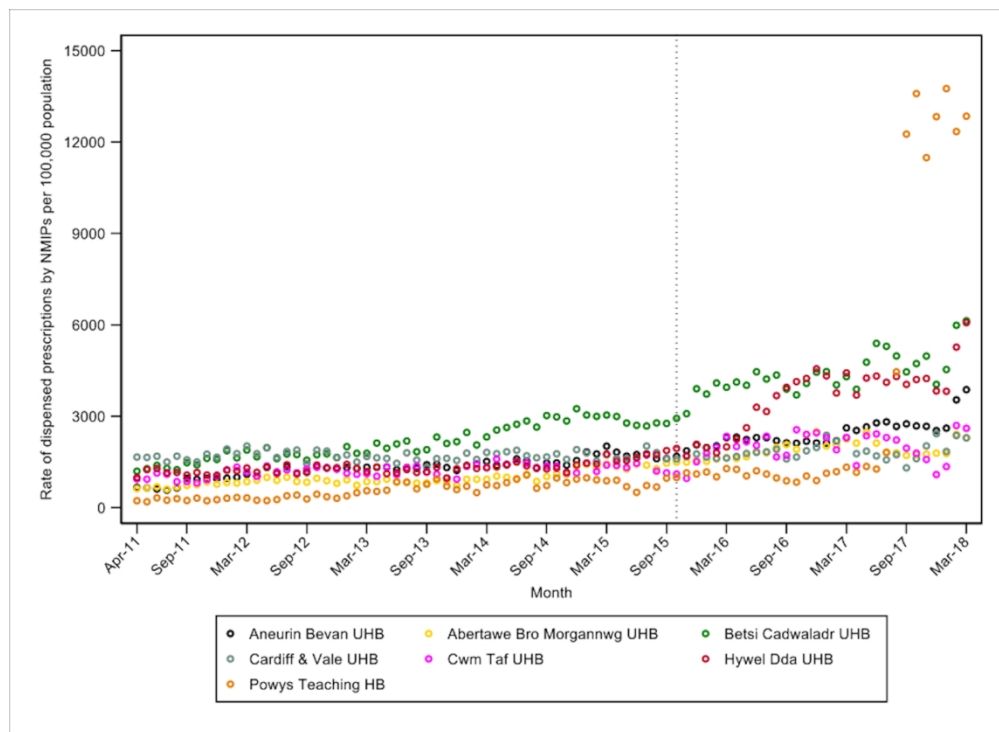

Figure 4 Trend of the total number of dispensed items per 100,000 population prescribed by NMIPs in primary care by health board (dashed line denotes the introduction of primary care clusters in October 2015)

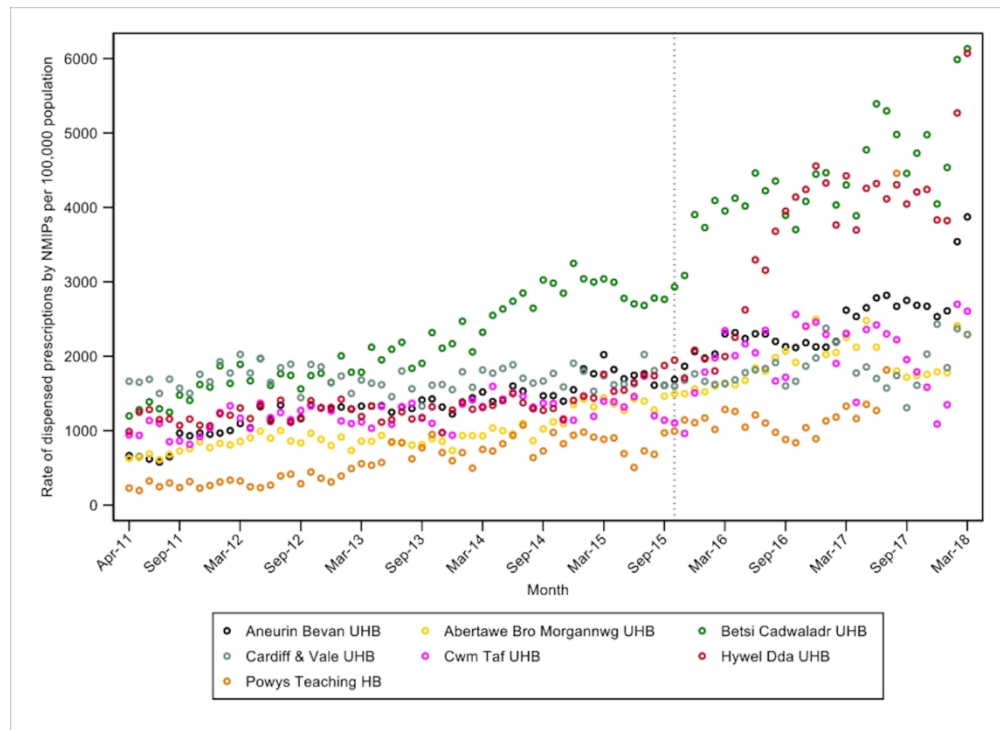

Figure 5 Trend of the total number of dispensed items per 100,000 population prescribed by NMIPs in primary care by health board (dashed line denotes introduction of primary care clusters in October 2015) \*  
\*Final seven outlying data points in Powys Teaching Health Board removed to illustrate trends in other Health Boards.



1  
2  
3 **Prescribing trends over time by non-medical independent prescribers (NMIPs) in primary care**  
4 **settings across Wales (2011-2018): a secondary database analysis**  
5

6 **Supplementary material**  
7

8 **Health board trends in dispensed prescriptions by non-medical prescribers across health boards in**  
9 **Wales**  
10

11 **Table S1:** Health Board-specific parameter estimates from the interrupted time series analysis  
12 examining the change in level and slope of dispensed prescriptions in primary care by NMIPs following  
13 the implementation of primary care clusters in October 2015 (N = 84 months) \*  
14

| Health board                                           | Variable                | Coefficient | Lower 95% CI | Upper 95% CI | p-value |
|--------------------------------------------------------|-------------------------|-------------|--------------|--------------|---------|
| Aneurin Bevan University Health Board                  | Intercept               | 4639.4      | 4019.8       | 5259.0       | <0.001  |
|                                                        | Pre-intervention slope  | 109.9       | 89.7         | 130.1        | <0.001  |
|                                                        | Level change            | -27.5       | -1321.8      | 1266.8       | 0.966   |
|                                                        | Post-intervention slope | 144.7       | 40.9         | 248.5        | 0.007   |
| Abertawe Bro Morgannwg University Health Board (lag 3) | Intercept               | 3268.9      | 2833.5       | 3704.3       | <0.001  |
|                                                        | Pre-intervention slope  | 65.4        | 47.2         | 83.6         | <0.001  |
|                                                        | Level change            | 1954.3      | 534.6        | 3374.0       | 0.008   |
|                                                        | Post-intervention slope | 28.6        | -52.4        | 109.7        | 0.484   |
| Betsi Cadwaladr University Health Board                | Intercept               | 8480.1      | 7791.3       | 9168.9       | <0.001  |
|                                                        | Pre-intervention slope  | 239.7       | 208.3        | 271.1        | <0.001  |
|                                                        | Level change            | 2634.6      | 3.1          | 5266.0       | 0.050   |
|                                                        | Post-intervention slope | 195.4       | 2.7          | 388.1        | 0.047   |
| Cardiff and Vale University Health Board (lag 8)       | Intercept               | 7976.3      | 7458.2       | 8494.4       | <0.001  |
|                                                        | Pre-intervention slope  | 6.1         | -6.6         | 18.9         | 0.342   |
|                                                        | Level change            | -266.1      | -876.5       | 344.4        | 0.388   |
|                                                        | Post-intervention slope | 65.4        | 12.6         | 118.1        | 0.016   |
| Cwm Taf University Health Board (lag 4)                | Intercept               | 2998.4      | 2689.6       | 3307.4       | <0.001  |
|                                                        | Pre-intervention slope  | 22.7        | 13.1         | 32.3         | <0.001  |
|                                                        | Level change            | 1104.3      | -310.2       | 2518.7       | 0.124   |
|                                                        | Post-intervention slope | 16.6        | -75.0        | 108.2        | 0.720   |

15  
16  
17  
18  
19  
20  
21  
22  
23  
24  
25  
26  
27  
28  
29  
30  
31  
32  
33  
34  
35  
36  
37  
38  
39  
40  
41 \*Models fitted with a lag of order 1 unless otherwise specified. Note that linear modelling assumptions  
42 were not fulfilled for Hywel Dda and Powys Health Boards and Findings are illustrated graphically in  
43 Figures S6 and S7.  
44  
45  
46  
47  
48  
49  
50  
51  
52  
53  
54  
55  
56  
57  
58  
59  
60

**Table S2:** Comparison between actual and counterfactual dispensed prescriptions in primary care by NMIPs\*

| Health board                                   | Estimate                          | Coefficient | Lower 95% CI | Upper 95% CI |
|------------------------------------------------|-----------------------------------|-------------|--------------|--------------|
| All Wales                                      | Absolute difference at March 2018 | 44415.5     | 34086.8      | 54744.1      |
|                                                | Relative difference at March 2018 | 60.5        | 45.6         | 75.3         |
| Aneurin Bevan University Health Board          | Absolute difference at March 2018 | 4313.3      | 1924.1       | 6702.5       |
|                                                | Relative difference at March 2018 | 31.1        | 12.7         | 49.5         |
| Abertawe Bro Morgannwg University Health Board | Absolute difference at March 2018 | 2813.2      | 751.1        | 4875.4       |
|                                                | Relative difference at March 2018 | 32.1        | 6.1          | 58.1         |
| Betsi Cadwaladr University Health Board        | Absolute difference at March 2018 | 8496.7      | 4136.1       | 12857.3      |
|                                                | Relative difference at March 2018 | 29.7        | 13.5         | 45.9         |
| Cardiff and Vale University Health Board       | Absolute difference at March 2018 | 1694.8      | 332.9        | 3056.7       |
|                                                | Relative difference at March 2018 | 20.0        | 3.4          | 36.5         |
| Cwm Taf University Health Board                | Absolute difference at March 2018 | 1601.9      | -78.1        | 3281.9       |
|                                                | Relative difference at March 2018 | 32.7        | -2.9         | 68.2         |

\*The counterfactual represents predicted values and trends in the absence of the implementation of primary care clusters in October 2015 (i.e. making the assumption that pre-implementation trends would have continued in the same way).

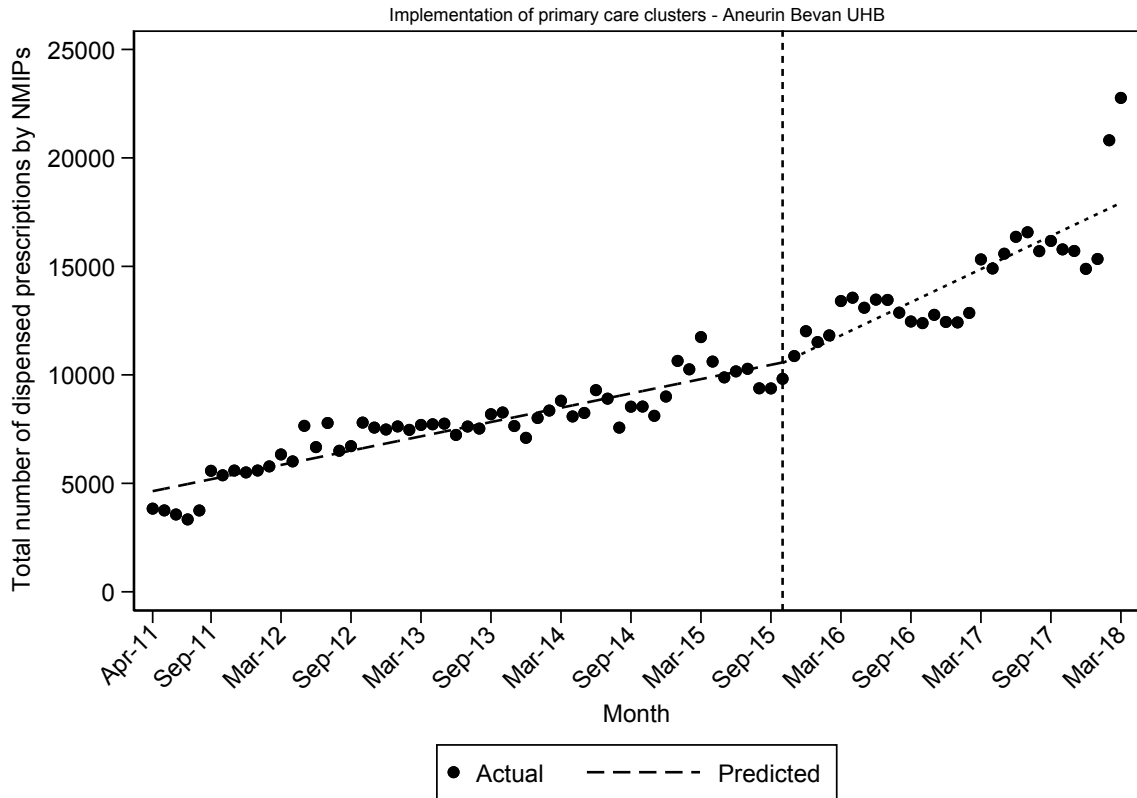

**Figure S1:** Observed and predicted dispensed prescriptions in primary care by NMIPs prior to and following the implementation of primary care clusters in October 2015 (Aneurin Bevan University Health Board)

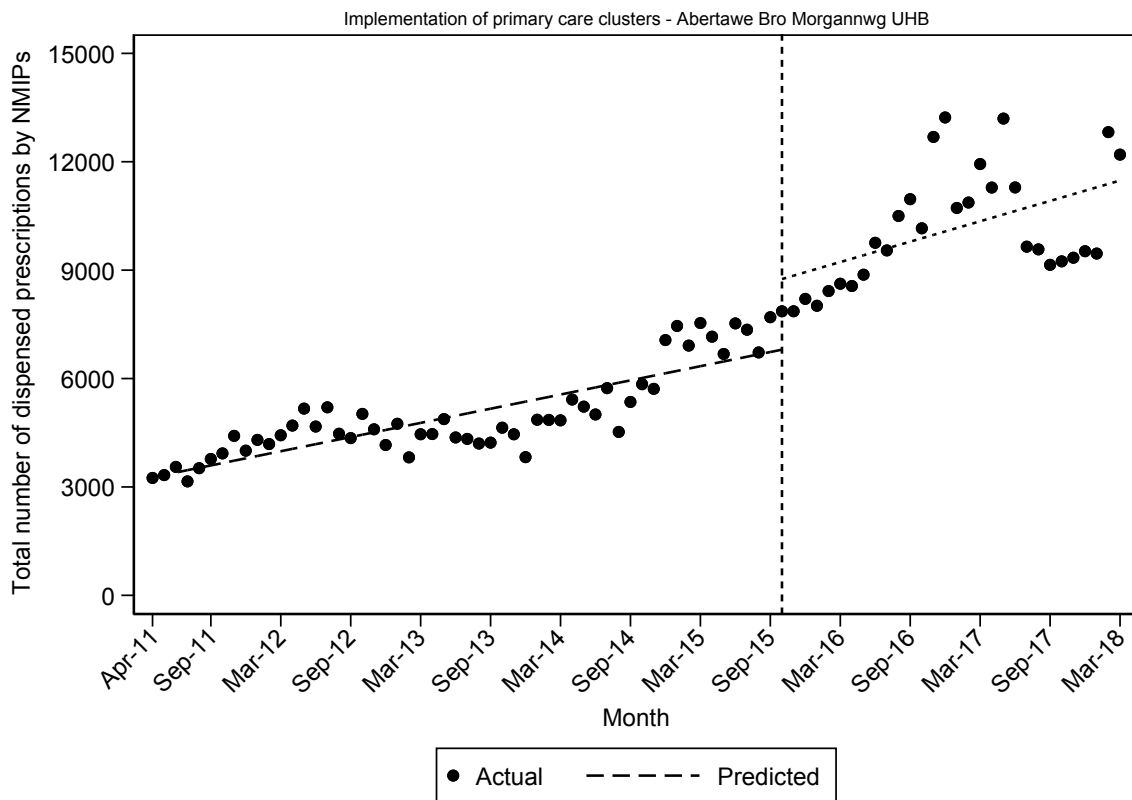

**Figure S2:** Observed and predicted dispensed prescriptions in primary care by NMIPs prior to and following the implementation of primary care clusters in October 2015 (Abertawe Bro Morgannwg University Health Board)

View only

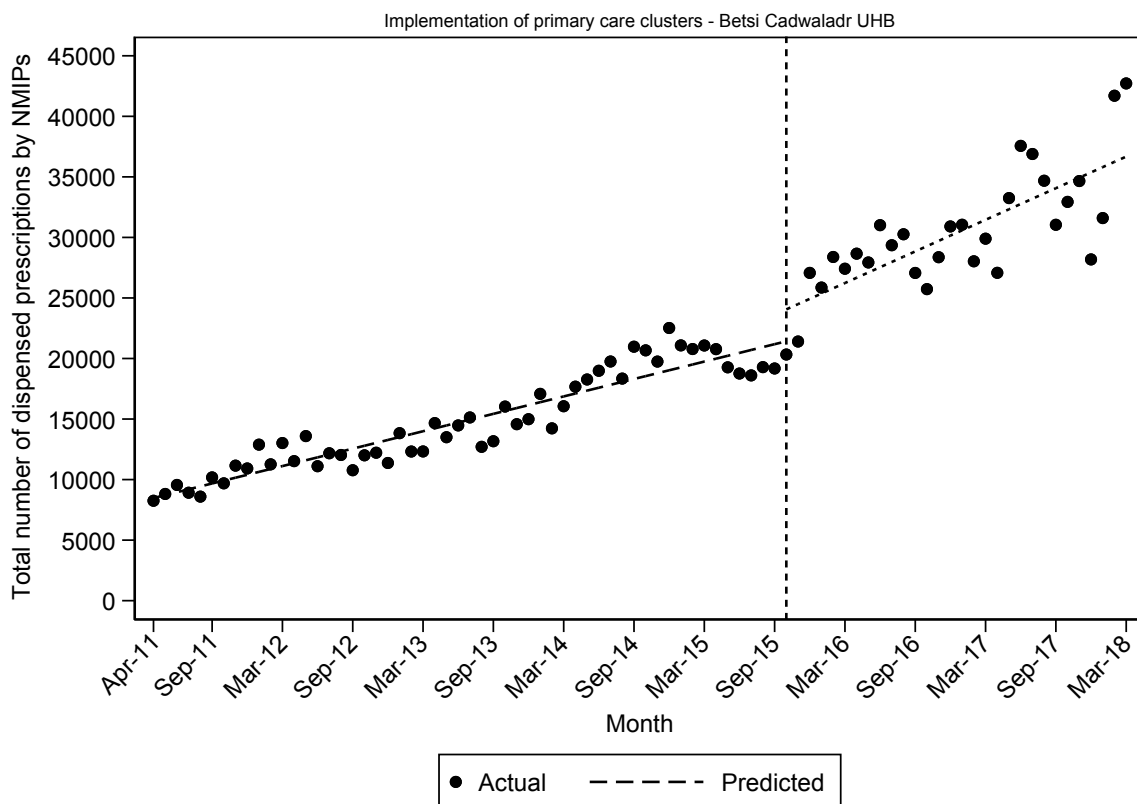

**Figure S3:** Observed and predicted dispensed prescriptions in primary care by NMIPs prior to and following the implementation of primary care clusters in October 2015 (Betsi Cadwaladr University Health Board)

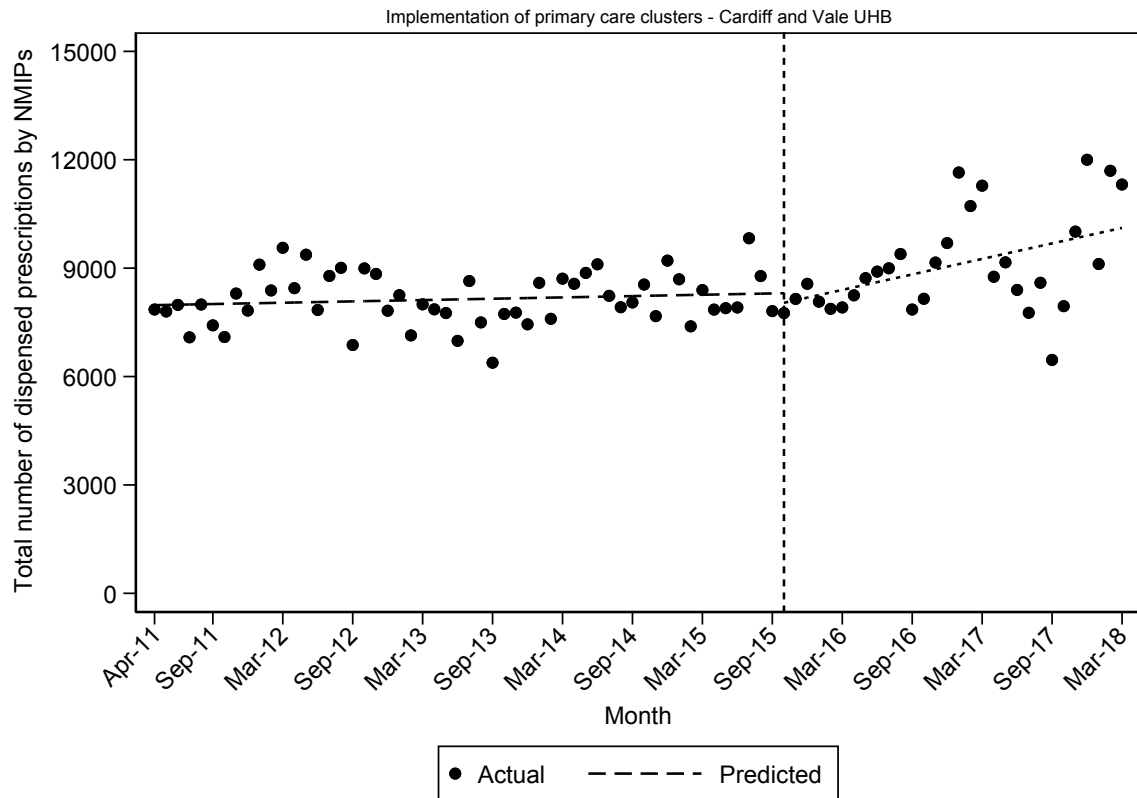

**Figure S4:** Observed and predicted dispensed prescriptions in primary care by NMIPs prior to and following the implementation of primary care clusters in October 2015 (Cardiff and Vale University Health Board)

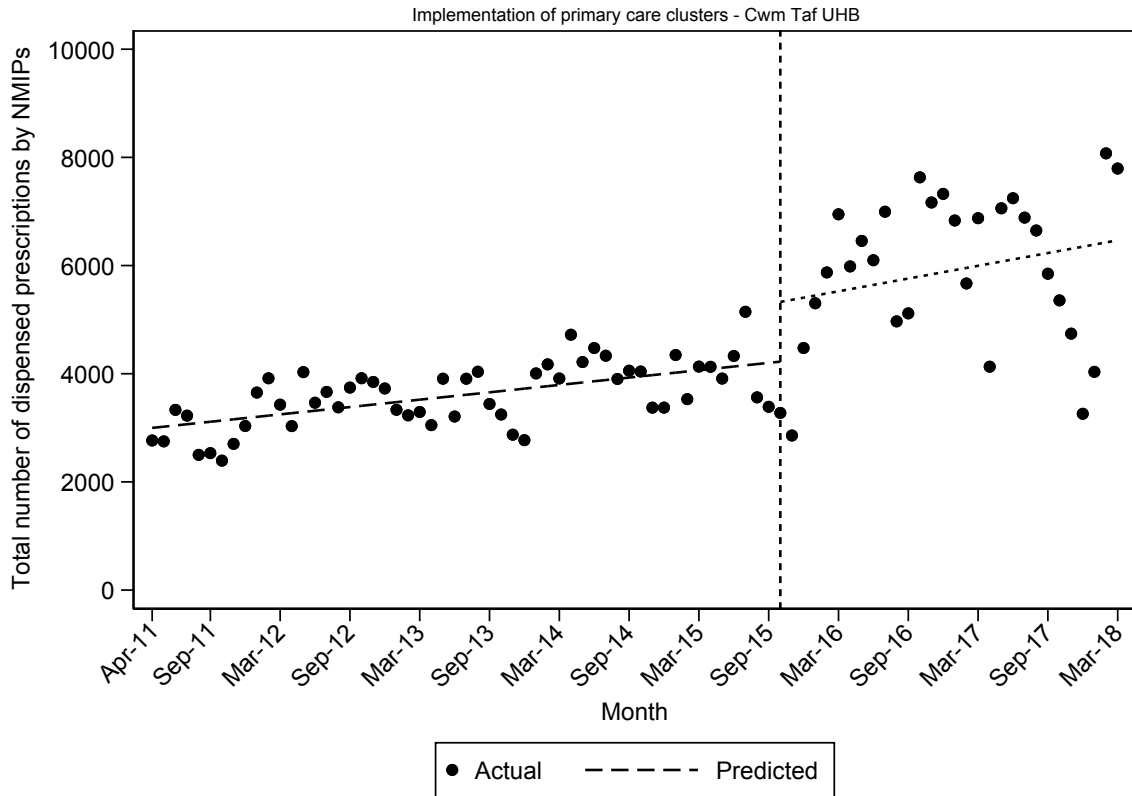

**Figure S5:** Observed and predicted dispensed prescriptions in primary care by NMIPs prior to and following the implementation of primary care clusters in October 2015 (Cwm Taf University Health Board)

View only

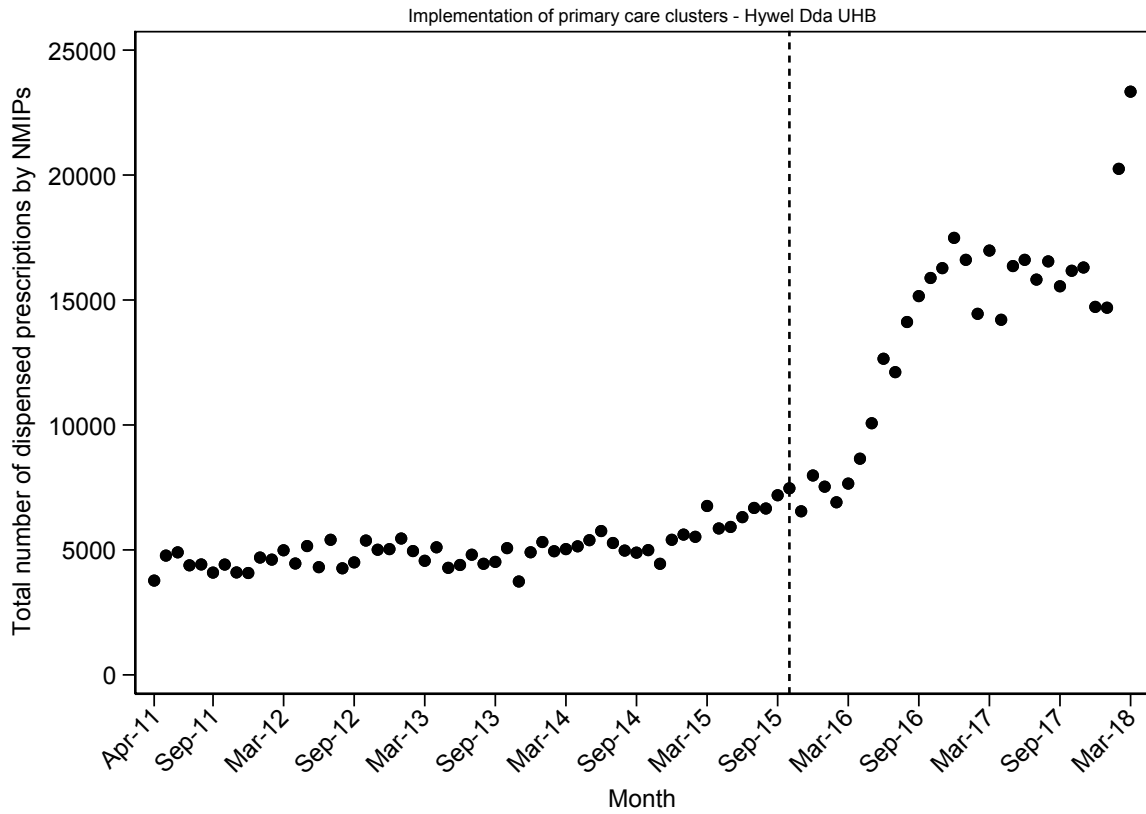

**Figure S6:** Observed dispensed prescriptions in primary care by NMIPs prior to and following the implementation of primary care clusters in October 2015 (Hywel Dda University Health Board)

Review only



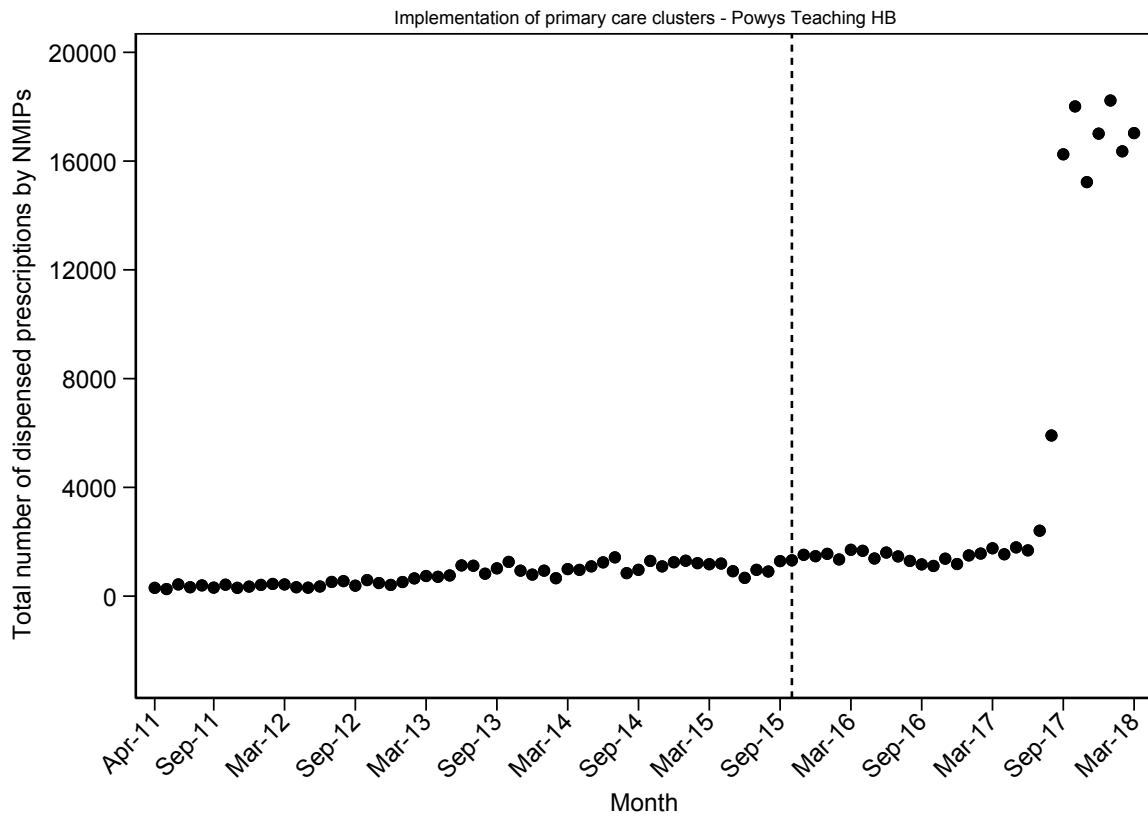

**Figure S7:** Observed dispensed prescriptions in primary care by NMIPs prior to and following the implementation of primary care clusters in October 2015 (Powys Teaching Health Board)

Review only

# BMJ Open

## Prescribing trends over time by non-medical independent prescribers (NMIPs) in primary care settings across Wales (2011-2018): a secondary database analysis

|                                 |                                                                                                                                                                                                                                                                                                                                                                                                                                                                                                                                                                                                                                                                                                                                                                                                                                                       |
|---------------------------------|-------------------------------------------------------------------------------------------------------------------------------------------------------------------------------------------------------------------------------------------------------------------------------------------------------------------------------------------------------------------------------------------------------------------------------------------------------------------------------------------------------------------------------------------------------------------------------------------------------------------------------------------------------------------------------------------------------------------------------------------------------------------------------------------------------------------------------------------------------|
| Journal:                        | <i>BMJ Open</i>                                                                                                                                                                                                                                                                                                                                                                                                                                                                                                                                                                                                                                                                                                                                                                                                                                       |
| Manuscript ID                   | bmjopen-2019-036379.R2                                                                                                                                                                                                                                                                                                                                                                                                                                                                                                                                                                                                                                                                                                                                                                                                                                |
| Article Type:                   | Original research                                                                                                                                                                                                                                                                                                                                                                                                                                                                                                                                                                                                                                                                                                                                                                                                                                     |
| Date Submitted by the Author:   | 08-Aug-2020                                                                                                                                                                                                                                                                                                                                                                                                                                                                                                                                                                                                                                                                                                                                                                                                                                           |
| Complete List of Authors:       | Alghamdi, Saeed; Cardiff University, School of Pharmacy and Pharmaceutical Sciences<br>Hodson, Karen; Cardiff University, School of Pharmacy and Pharmaceutical Sciences<br>Deslandes, Paul; University Hospital Llandough, All Wales Therapeutics and Toxicology Centre, Academic Centre; University of South Wales - Trefforest Campus, School of Care Sciences<br>Gillespie, David; Centre for Trials Research, University of Cardiff<br>Haines, kath; University Hospital Llandough, All Wales Therapeutics and Toxicology Centre, Academic Centre<br>Hulme, Elliott ; Cardiff University, School of Pharmacy and Pharmaceutical Sciences<br>Courtenay, Molly; Cardiff University, School of Healthcare Sciences, College of Biomedical and Life Sciences<br>Deslandes, Rhian; Cardiff University, School of Pharmacy and Pharmaceutical Sciences |
| <b>Primary Subject Heading</b>: | General practice / Family practice                                                                                                                                                                                                                                                                                                                                                                                                                                                                                                                                                                                                                                                                                                                                                                                                                    |
| Secondary Subject Heading:      | Health services research                                                                                                                                                                                                                                                                                                                                                                                                                                                                                                                                                                                                                                                                                                                                                                                                                              |
| Keywords:                       | PRIMARY CARE                                                                                                                                                                                                                                                                                                                                                                                                                                                                                                                                                                                                                                                                                                                                                                                                                                          |
|                                 |                                                                                                                                                                                                                                                                                                                                                                                                                                                                                                                                                                                                                                                                                                                                                                                                                                                       |

SCHOLARONE™  
Manuscripts



I, the Submitting Author has the right to grant and does grant on behalf of all authors of the Work (as defined in the below author licence), an exclusive licence and/or a non-exclusive licence for contributions from authors who are: i) UK Crown employees; ii) where BMJ has agreed a CC-BY licence shall apply, and/or iii) in accordance with the terms applicable for US Federal Government officers or employees acting as part of their official duties; on a worldwide, perpetual, irrevocable, royalty-free basis to BMJ Publishing Group Ltd ("BMJ") its licensees and where the relevant Journal is co-owned by BMJ to the co-owners of the Journal, to publish the Work in this journal and any other BMJ products and to exploit all rights, as set out in our [licence](#).

The Submitting Author accepts and understands that any supply made under these terms is made by BMJ to the Submitting Author unless you are acting as an employee on behalf of your employer or a postgraduate student of an affiliated institution which is paying any applicable article publishing charge ("APC") for Open Access articles. Where the Submitting Author wishes to make the Work available on an Open Access basis (and intends to pay the relevant APC), the terms of reuse of such Open Access shall be governed by a Creative Commons licence – details of these licences and which [Creative Commons](#) licence will apply to this Work are set out in our licence referred to above.

Other than as permitted in any relevant BMJ Author's Self Archiving Policies, I confirm this Work has not been accepted for publication elsewhere, is not being considered for publication elsewhere and does not duplicate material already published. I confirm all authors consent to publication of this Work and authorise the granting of this licence.

1  
2  
3  
4  
5  
6  
7  
8  
9  
10  
11  
12  
13  
14  
15  
16  
17  
18  
19  
20  
21  
22  
23  
24  
25  
26  
27  
28  
29  
30  
31  
32  
33  
34  
35  
36  
37  
38  
39  
40  
41  
42  
43  
44  
45  
46  
47  
48  
49  
50  
51  
52  
53  
54  
55  
56  
57  
58  
59  
60

## Prescribing trends over time by non-medical independent prescribers (NMIPs) in primary care settings across Wales (2011-2018): a secondary database analysis

Saeed Alghamdi<sup>1</sup>, Karen L Hodson<sup>2</sup>, Paul Deslandes<sup>3,4</sup>, David Gillespie<sup>5</sup>, Kath Haines<sup>3</sup>, Elliott Hulme<sup>2</sup>, Molly Courtenay<sup>6</sup>, Rhian Deslandes<sup>2</sup>

1. *School of Pharmacy and Pharmaceutical Sciences, Cardiff University, Redwood Building, King Edward VII Avenue, Cardiff, CF10 3NB, Wales, United Kingdom; e-mail: [alghamdiss@cardiff.ac.uk](mailto:alghamdiss@cardiff.ac.uk); telephone number: 00447879099427*
2. *School of Pharmacy and Pharmaceutical Sciences, Cardiff University, Cardiff, Wales, United Kingdom*
3. *All Wales Therapeutics and Toxicology Centre, Academic Centre, University Hospital Llandough, Cardiff, Wales, United Kingdom*
4. *School of Care Sciences, University of South Wales, Treforest, Wales, United Kingdom*
5. *Centre for Trials Research, Cardiff University, Cardiff, Wales, United Kingdom*
6. *School of Healthcare Sciences, College of Biomedical and Life Sciences, Cardiff University, Cardiff, Wales, United Kingdom*

### Correspondence to:

Saeed Alghamdi;  
[alghamdiss@cardiff.ac.uk](mailto:alghamdiss@cardiff.ac.uk)

**Word count: 3974 words**

**Key words:** Non-medical prescribing, independent prescribing, primary care, prescribing analysis.

## ABSTRACT

**Introduction** As of 2015, as part of the implementation of the Welsh Government Primary Care Plan and primary care clusters, the Welsh Government has encouraged non-medical healthcare professionals working in primary care to train as independent prescribers (IPs).

**Design** Retrospective secondary data analysis and Interrupted Time Series (ITS) analysis in order to compare prescribing by non-medical independent prescribers (NMIPs) pre and post-implementation of primary care clusters across Wales.

**Objectives** This research aimed to identify the number of NMIPs in primary care in Wales and describe their prescribing trend of items between 2011 and 2018, in order to compare their prescribing pattern before and after the implementation of primary care clusters for Wales.

**Results** Over the study period, 600 NMIPs (nurses n=474 and pharmacists n=104) had prescribed at least one item. The number of nurse IPs increased by 108% and pharmacists by 325% (pharmacists had the largest increase between July 2015 and March 2018). The number of items prescribed by NMIPs increased over time by an average of 1,380 per month (95% CI: 904 to 1855,  $p < 0.001$ ) after the implementation of primary care clusters compared to 496 (95% CI: 445 to 548,  $p < 0.001$ ) prior its implementation. Approximately one third of the items prescribed by NMIPs was within Betsi Cadwaladr University Health Board (HB) with only 4% in Powys Teaching HB.

**Conclusion** The number of NMIPs and their volume of prescribing in primary care in Wales has increased following the implementation of primary care clusters in 2015. This suggests that the Government's recommendations of utilising NMIPs in primary care have been implemented. Future studies should focus on efficiency and quality of prescribing by NMIPs in primary care.

## STRENGTHS AND LIMITATIONS OF THIS STUDY

- This is the first study using a secondary database analysis, which has provided insights and empirical findings on the prescribing pattern of medicines by non-medical independent prescribers (NMIPs) over time in primary care in Wales.
- The data provided via the Comparative Analysis System for Prescribing Audit (CASPA) software system was limited to the last seven years and only captured prescriptions that were dispensed in community pharmacies.
- The CASPA system was designed for financial reimbursement purposes for community pharmacies, which means that holding investigations at the level of patients or prescribers, such as stopping or changing patients' medications, as well as clinical safety issues or other prescribing activities, were not possible.
- The professions of NMIPs as pharmacist, nurse, physiotherapist or others were not identified on the prescriptions and, consequently, in the CASPA system.
- The ITS analysis has the strength of evaluating data at the whole population level, which allowed the researchers to evaluate the utilisation of NMIPs in primary care across all of Wales.

## INTRODUCTION

The right to prescribe medicines was traditionally restricted to physicians, dentists and veterinary surgeons[1]. Prescribing practice has changed over the last 50 years to involve not only physicians and dentists (medical prescribers) but also other health care professionals, known as non-medical prescribers. The adoption of non-medical prescribing fundamentally began in the USA in the 1960s[2] and has extended to the UK, Canada, New Zealand, Australia, and other European and African nations[3]. Beyond the UK, solely nurses and pharmacists have been granted the authority to prescribe medicines collaboratively (dependently) under a physician's supervision or independently from a limited lists of medicines[4-7]. The drive to extend the medicines prescribing mandate to non-medical healthcare professionals was related to a variety of aspects within every nation.

In the UK, non-medical prescribing was introduced as part of the National Health Service (NHS) plans, which intended to improve and modernise the health care system[8,9]. The aim of introducing non-medical prescribing was to enhance patient care and safety, improve patient access and choice of appropriate medicines for their conditions, use the already gained skills of health care professionals in the most effective way, and promote a more flexible teamwork environment in the NHS[10]. Pharmacists, nurses, optometrists and Allied Health Professionals can qualify as non-medical prescribers after completing an advanced prescribing training programme[9,10]. This programme lawfully allows these healthcare professionals to prescribe within their area of competence. such as that pharmacists and nurses can prescribe medicines, appliances, and wound dressings as either independent or supplementary prescribers within their clinical area of practice. Some NMIPs are limited to prescribe certain medications within their clinical of speciality, such as

1  
2  
3 optometrists who can only prescribe for eye conditions and surrounding tissues[9].  
4

5  
6 Independent prescribing is defined as ‘prescribing by a practitioner (e.g. a  
7 doctor, dentist, nurse, or a pharmacist) responsible and accountable for the  
8 assessment of patients with undiagnosed or diagnosed conditions and for decisions  
9 about the clinical management required, including prescribing’[10]. Whereas,  
10 supplementary prescribing is a ‘voluntary partnership between the responsible  
11 independent prescriber and a supplementary prescriber, to implement an agreed  
12 patient-specific clinical management plan with the patient’s agreement, particularly but  
13 not only in relation to prescribing for a specific non-acute medical condition or health  
14 need affecting the patient’[11]. Non-medical independent prescribing was introduced  
15 in the UK in 2002 after a change in the legislation made by the UK Government  
16 allowing the first level registered nurses who have at least 3 years of experience to  
17 prescribe independently from a limited list of medicines[12]. In 2006, independent  
18 prescribing extended for qualified nurses and pharmacists who completed the  
19 necessary training to prescribe any medicines within their area of competence with  
20 few exceptions[10]. This was followed by the introduction of optometrist independent  
21 prescribing in 2007[13], and more recently, independent prescribing by Allied Health  
22 Professionals including podiatrists and physiotherapists independent prescribing in  
23 2013[14], and therapeutic radiographers independent prescribing in 2016[15]. The  
24 recent healthcare professionals who gained the prescribing authority in Wales were  
25 paramedics in 2019. In 2017, the estimated number of non-medical independent  
26 prescribers (NMIPs) in the UK was as follows: 30,000 nurse independent prescribers  
27 (IPs); 3,000 pharmacist IPs and 600 Allied Health Professionals IPs[16]. All NMIPs are  
28 responsible and accountable for their own prescribing and limiting their prescribing to  
29 their therapeutic area of expertise[9]. Moreover, these healthcare professionals are  
30  
31  
32  
33  
34  
35  
36  
37  
38  
39  
40  
41  
42  
43  
44  
45  
46  
47  
48  
49  
50  
51  
52  
53  
54  
55  
56  
57  
58  
59  
60



1  
2  
3 required to seek appropriate advice or referral if they lack the confidence to manage  
4 patients' conditions or prescribe the suitable medicines for their patients[9].  
5  
6

7  
8 In Wales, the NHS provides its services via three NHS Trusts and seven health  
9 boards (HBs). The seven HBs are Swansea Bay University HB (SBUHB), Cardiff and  
10 Vale University HB (CVUHB), Cwm Taf Morgannwg University HB (CTMUHB), Hywel  
11 Dda University HB (HDUHB), Powys Teaching HB (PTHB), Betsi Cadwaladr  
12 University HB (BCUHB) and Aneurin Bevan University HB (ABUHB). The SBUHB was  
13 formerly known as Abertawe Bro Morgannwg University HB (ABMUHB), having being  
14 renamed in 2019.  
15  
16  
17  
18  
19  
20  
21  
22

23  
24 Primary health care services are the initial point of care for patients in the NHS.  
25 In Wales, it has been estimated that around 90% of people's contact with the NHS is  
26 with primary care services, with General Practices the main point of contact[17]. In  
27 2016, there were 441 General Practices in Wales and 2,009 General Practitioners  
28 (GPs) (excluding, locums, retainers, and registrars)[18]. The Welsh Government and  
29 HBs have focused upon improving primary care services[17], and this has included  
30 the development of primary care clusters. Clusters comprise groups of adjacent  
31 general practices that have linked together to provide advanced medical services  
32 locally in order to relieve pressure on hospitals[19]. The aims of these clusters include  
33 improving patients' access to their medicines and information as well as the provision  
34 of advice and support to manage medicines. These clusters came into being in the  
35 last quarter of 2015[19]. Currently, there are 64 primary care clusters in Wales which  
36 provide services for a population of 30,000 to 50,000 patients per cluster[19]. In order  
37 to overcome GP shortages[20,21], these clusters are supported by high numbers of  
38 hospital pharmacists, nurses and other professionals. In addition, the Welsh  
39 Government and HBs have prioritised funding for new posts and training of other  
40  
41  
42  
43  
44  
45  
46  
47  
48  
49  
50  
51  
52  
53  
54  
55  
56  
57  
58  
59  
60

1  
2  
3 health care professionals, such as pharmacist and nurse IPs[17]. Consequently, the  
4  
5 number of non-medical prescribers in primary care has increased in recent years and  
6  
7 is expected to rise further[16,21].  
8  
9

10 Only one published study has investigated the implementation of non-medical  
11  
12 prescribing in Wales[16]. This study aimed to provide an overview of the  
13  
14 implementation and utilisation of non-medical prescribing in all health care sectors  
15  
16 through a national questionnaire survey. The results of this study indicated that the  
17  
18 majority of non-medical prescribers in Wales were based in secondary care settings.  
19  
20 Moreover, these researchers stated that the utilisation of non-medical prescribers  
21  
22 across Wales, particularly in primary care, was inconsistent and had not been  
23  
24 implemented in all services. In addition, it was suggested that there was a need to  
25  
26 investigate and recognise the development of primary care services in Wales, with  
27  
28 support required for non-medical prescribers[16].  
29  
30  
31  
32

33 The aim of this study was to identify the number of NMIPs in Wales and  
34  
35 describe their prescribing volume (from April 2011 to March 2018) as a whole, as well  
36  
37 as within the seven HBs, before and after the implementation of primary care clusters.  
38  
39 This is the first study in Wales to use data obtained through a national database to  
40  
41 review prescribing volume by NMIPs in primary care. No equivalent studies have been  
42  
43 published internationally.  
44  
45  
46  
47  
48  
49  
50  
51  
52  
53  
54  
55  
56  
57  
58  
59  
60

## METHODOLOGY

The study design was a retrospective secondary data analysis of monthly data for prescriptions issued by NMIPs in primary care in Wales and dispensed in community pharmacies, as well as the data on the number of NMIPs within primary care in Wales.

The number of NMIPs who prescribed each month and who prescribed at least one item from April 2011 to March 2018 was obtained through the NHS Wales Shared Services Partnership, Primary Care Services. Prescribing data were obtained from the Comparative Analysis System for Prescribing Audit (CASPA) software system (Version 5), provided by the NHS Wales Shared Services. Data were fully anonymised and recorded as part of routine practice, as such, the study did not require ethical approval. CASPA records all dispensed WP10 prescriptions (NHS Welsh prescriptions for use in primary care), to allow financial reimbursement to community pharmacies[9]. Whilst it is acknowledged that dispensing may not fully reflect prescribing, due to patients not taking their prescriptions to a pharmacy for dispensing, the impact of this is likely to be small. This is due to that the prescription charge for people in Wales was abolished in 2007 allowing all patients who were registered with their Welsh GPs to get their prescriptions dispensed from a pharmacy in Wales free of charge[22]. As a result, the impact of non-dispensed items would have been reduced by this policy, which also limits the financial burden to patients. Therefore, dispensing was used as a surrogate marker for prescribing in this study.

The number of items refers to each single item prescribed by a prescriber on a prescription form to a patient[23]. All recorded WP10 prescriptions issued by GPs and NMIPs in Wales and dispensed by community pharmacists from April 2011 to March 2018 were extracted and included in the study. The number of prescribed items by

1  
2  
3 NMIPs were extracted from the CASPA system on a monthly basis, the total number  
4  
5 of items per 100,000 population (the population data in Wales as a whole and in each  
6  
7 HB obtained from the Welsh Government Stats Wales[24]) was calculated in order to  
8  
9 take the population into consideration. Percentages were calculated for the total  
10  
11 number of prescribed items by NMIPs in each HB. The name of ABMUHB was used  
12  
13 to illustrate the findings in this HB as this was its name over the study period.  
14  
15

16  
17 Although Randomised Controlled Trials (RCTs) are considered the gold standard  
18  
19 method to evaluate longitudinal effects of interventions over time[25-27], they lack the  
20  
21 ability to evaluate the already implemented service retrospectively[27]. Therefore,  
22  
23 prescribing trend data were compared before and after the introduction of primary care  
24  
25 clusters (the intervention) by using an interrupted time series (ITS) analysis. This  
26  
27 analysis was performed using ordinary-least squares regression with Newey-West  
28  
29 standard errors and a lag for the autocorrelation structure. The Cumby-Huizinga test  
30  
31 for autocorrelation was examined to determine the appropriate autocorrelation  
32  
33 structure to be accounted for in the model. The model included pre- and post-  
34  
35 intervention trends, as well as a coefficient to examine a change in level immediately  
36  
37 post-intervention. The parameter estimates are presented alongside 95% confidence  
38  
39 intervals and p-values. The counterfactual trend (i.e. the trend in the absence of the  
40  
41 intervention) was examined, and this was compared to the actual observed trend to  
42  
43 calculate absolute and relative differences at the end of the observed period (March  
44  
45 2018). Analysis was performed using the *itsa* command in Stata V16.0[28]. The  
46  
47 findings were assumed significant at p value <0.05. Confidence intervals (CIs) were  
48  
49 calculated in order to be 95% certain that the range of values contained the true mean  
50  
51 of the data[29].  
52  
53  
54  
55  
56  
57

58 The Welsh Government plan[17] encouraged local HBs to prioritise funding and  
59  
60

1  
2  
3 development of primary care clusters in April 2015. However, the implementation of  
4 these clusters is the responsibility of each individual local HB and there are no  
5 definitive time points of their establishment. To accommodate this, the researchers  
6 engaged with the relevant stakeholders (e.g. policy makers and Chief Pharmaceutical  
7 Officer) to determine the appropriate time for the intervention phase. They agreed the  
8 intervention phase began six months after the provided funding by the Government to  
9 HBs, meaning October 2015, to allow for an appropriate time for each HB to train  
10 NMIPs.  
11  
12  
13  
14  
15  
16  
17  
18  
19  
20  
21

22 **Patient and public involvement** - This research was done without patient and public  
23 involvement. Patients were not invited to comment on the study design and were not  
24 consulted to develop patient relevant outcomes or interpret the results. Patients were  
25 not invited to contribute to the writing or editing of this document for readability or  
26 accuracy.  
27  
28  
29  
30  
31  
32  
33  
34  
35  
36  
37  
38  
39  
40  
41  
42  
43  
44  
45  
46  
47  
48  
49  
50  
51  
52  
53  
54  
55  
56  
57  
58  
59  
60

## RESULTS

### Trend of the total number of items prescribed by all prescribers

The total number of items prescribed by all health care professionals (GPs and non-medical prescribers) from April 2011 to March 2018 was 540,781,584 items (17,482,150 per 100,000 population). The total number of prescribed items per 100,000 population per year increased by 7.1% between 2011-2012 (n= 2,371,511) and 2014-2015 (n= 2,539,192) and increased by 0.7% between 2014-2015 (n= 2,539,192) and 2017-2018 (n= 2,556,784] (Figure 1).

### Trend of the total number of items prescribed by NMIPs

The total number of items prescribed by NMIPs in primary care in Wales between April 2011 and March 2018 was 5,088,405 items (n= 164,130 per 100,000 population). The number of items prescribed as a percentage of all items prescribed by all health care professionals (except items prescribed by dentists) increased from 0.57% in 2011-2012 to 1.7% in 2017-2018. As shown in Table 1 and Figure 2, dispensed prescriptions by NMIPs in primary care started at 31,756 and increased on average per month prior to the implementation of primary care clusters by 496 (95% CI: 445 to 548,  $p < 0.001$ ). There was no evidence to suggest a change in the level immediately following the implementation of primary care clusters in October 2015. However, following this implementation, there was an increase in dispensed prescriptions per month, relative to pre-implementation trends, of 1,380 on average (95% CI: 904 to 1855,  $p < 0.001$ ).

Table 1: Parameter estimates from the interrupted time series analysis examining the change in level and slope of dispensed prescriptions in primary care by NMIPs following the implementation of primary care clusters in October 2015 (N = 84 months)

| Variable                | Coefficient | Lower 95% CI | Upper 95% CI | p-value |
|-------------------------|-------------|--------------|--------------|---------|
| Intercept               | 31755.5     | 30208.3      | 33302.8      | <0.001  |
| Pre-intervention slope  | 496.3       | 444.8        | 547.8        | <0.001  |
| Level change            | 3023.4      | -2151.5      | 8198.2       | 0.248   |
| Post-intervention slope | 1379.7      | 904.4        | 1855.1       | <0.001  |

Assuming the pre-implementation trend would have continued in the absence of the introduction of primary care clusters, the expected number of dispensed prescriptions by NMIPs at the end of the observation period (March 2018) was 73,443 (95% CI: 70,260 to 76,627), and with the model predicting an expected number (in the presence of primary care clusters) of 117,859 (95% CI: 108,049 to 127,670), there was a 60% relative increase in the number of dispensed prescriptions by NMIPs following the implementation of primary care clusters over and above what would have been expected in the absence of such a scheme (95% CI: 46 to 75,  $p < 0.001$ ).

### The total number of NMIPs

Data obtained from the NHS Wales Shared Services Partnership shows that the total number of NMIPs who prescribed at least one item from April 2011 to March 2018 was 600 prescribers (474 nurses, 104 pharmacists, 21 physiotherapists and 1 with unknown profession). The total number of NMIPs in each HB is illustrated in Figure 3. The number of prescribing NMIPs per month increased by approximately 140% between April 2011 (n=174) and March 2018 (n=414). Of those, the number of nurses increased from 158 in April 2011 to 328 in March 2018 (an increase of 108%). The number of pharmacists increased from 16 in April 2011 to 68 in March 2018 (an

1  
2  
3 increase of 325%), the largest increase was from July 2015 (n=20) to March 2018  
4  
5 (n=68) by 240%. In January 2015, the first physiotherapist IP started to prescribe with  
6  
7 the number increasing to 17 in March 2018.  
8  
9

### 10 11 **Trend of the total number of prescribed items by NMIPs in different HBs pre** 12 13 **and post-intervention** 14

15  
16  
17 Table 2 presents the total number of items prescribed by NMIPs, as well as the  
18  
19 number per 100,000 population and percentage of all items prescribed, per HB.  
20  
21 Approximately one third of the items prescribed by NMIPs was within BCUHB (Table  
22  
23 2) with only 4% in PTHB. Data by HBs are illustrated in Figure 4 and Figure 5, and it  
24  
25 can also be seen in the supplementary file.  
26  
27  
28  
29  
30  
31  
32  
33  
34  
35  
36  
37  
38  
39  
40  
41  
42  
43  
44  
45  
46  
47  
48  
49  
50  
51  
52  
53  
54  
55  
56  
57  
58  
59  
60



Table 2 Total number of items prescribed by NMIPs, as well as the number per 100,000 population and percentage of all items prescribed, per HB in primary care in Wales and dispensed in community pharmacies since April 2011 until March 2018

| Health Board  | Total number of items prescribed by NMIPs | % of the prescribed items by NMIPs in each HB* | Prescribed items by NMIPs per 100,000 population |
|---------------|-------------------------------------------|------------------------------------------------|--------------------------------------------------|
| <b>BCUHB</b>  | 1,711,949                                 | 33.64%                                         | 240,742.5                                        |
| <b>ABUHB</b>  | 834,879                                   | 16.41%                                         | 139,396.5                                        |
| <b>CVUHB</b>  | 711,805                                   | 13.99%                                         | 145,069.9                                        |
| <b>HDUHB</b>  | 686,166                                   | 13.48%                                         | 172,782.9                                        |
| <b>ABMUHB</b> | 573,624                                   | 11.27%                                         | 106,813.2                                        |
| <b>CTMUHB</b> | 371,315                                   | 7.30%                                          | 122,620.2                                        |
| <b>PTHB</b>   | 198,667                                   | 3.91%                                          | 137,000.6                                        |

**ABMUHB** (Abertawe Bro Morgannwg University HB); **ABUHB** (Aneurin Bevan University HB); **BCUHB** (Betsi Cadwaladr University HB); **CTMUHB** (Cwm Taf Morgannwg University HB); **CVUHB** (Cardiff and Vale University HB); **HDUHB** (Hywel Dda University HB); **PTHB** (Powys Teaching HB)

\* The percentage of the prescribed items by NMIPs in each HB was calculated based on the total number of items prescribed by NMIPs in all Wales

## DISCUSSION

### Statement of the principal findings

This study investigated the number and associated prescribing volume of NMIPs before and after the implementation of primary care clusters in Wales. The number of NMIPs has increased in primary care in Wales over the study period and the majority of them were nurses, followed by pharmacists, and physiotherapists. Interestingly, the database did not identify other health care professionals who have prescribing authorisation in Wales, including therapeutic radiographers, chiropodists and podiatrists, and optometrists[16].

The analysis of the prescribed number of items by NMIPs before and after the implementation of primary care clusters showed a 60% relative increase following the implementation of the primary care clusters in Wales. However, the prescribing of items by NMIPs was inconsistent across the seven HBs.

### Strengths and weaknesses

This is the first study that has used a secondary database analysis, which has provided insights and empirical findings on the prescribing pattern of medicines by non-medical independent prescribers (NMIPs) over time in primary care in Wales. Although this study has achieved its aim and objectives, it has a number of limitations. Firstly, the data provided via the CASPA software system was limited to the last seven years. Secondly, this system was designed for financial reimbursement purposes for community pharmacies, which means that holding investigations at the level of patients or prescribers, such as stopping or changing patients' medications, as well as clinical safety issues or other prescribing activities, were not possible. In addition, this

1  
2  
3 system only captured NHS prescriptions that were dispensed in community  
4 pharmacies. Therefore, prescriptions issued by those prescribers that have not been  
5 dispensed as well as private prescriptions that have been prescribed by NMIPs, such  
6 as optometrists, were not captured by the system. Finally, the professions of NMIPs  
7 as pharmacist, nurse, physiotherapist or other were not identified on the prescriptions  
8 and, consequently, in the CASPA system. The ITS analysis may have the limitation  
9 of the presence of unknown confounding variables, which are outside of the  
10 researcher's control, that may have happened at the same time of the intervention and  
11 this leads to the difficulty of establishing causal effects[30]. However, this analysis has  
12 the strength of evaluating data at the whole population level[31], which allowed the  
13 researchers to evaluate the utilisation of NMIPs in primary care across all of Wales.  
14  
15  
16  
17  
18  
19  
20  
21  
22  
23  
24  
25  
26  
27  
28  
29

### 30 **Comparison with other studies**

31  
32  
33 The increase in the number of NMIPs in primary care in Wales may suggest  
34 that the primary care sector has recognised the skills of these practitioners, improving  
35 the skill-mix in this sector, and hopefully reducing the pressure on GPs i.e. the benefits  
36 described in the second Crown Report[32]. Since the last quarter of 2015, the increase  
37 in the percentage of pharmacist IPs was higher than the increase in the percentage of  
38 nurse IPs (325% vs 108%). This could be explained by the implementation of the  
39 Welsh Government Plan[17], introduction of primary care clusters[19], and the  
40 shortage of GPs in Wales, particularly in BCUHB[15,32,33,34]. All of these factors  
41 may have contributed to recruitment of more pharmacist IPs[17]. Pharmacist  
42 independent prescribing is a new role for pharmacists within clusters, with many  
43 secondary care based pharmacist IPs moving into these positions[21]. This may lead  
44 to a shortage of pharmacists within secondary care and has highlighted the need for  
45  
46  
47  
48  
49  
50  
51  
52  
53  
54  
55  
56  
57  
58  
59  
60

1  
2  
3 a pharmacy workforce plan for Wales.  
4  
5

6 Although the number of nurse IPs is much greater than pharmacist IPs, they only  
7 represent 5% of the nursing workforce[35], while pharmacist IPs represent 7% of the  
8 pharmacist profession[36]. The fact that there are more nurse IPs than other  
9 professions is in line with the findings of other studies that have investigated the  
10 implementation of non-medical prescribing in England[33,37] and Wales[16].  
11 Therapeutic radiographer IPs are based within secondary or tertiary care settings in  
12 Wales and therefore, they would be unlikely to be included in the database. However,  
13 the other professions, such as chiropodists, podiatrists and optometrists, could  
14 potentially be working in primary care settings but do not appear to have issued NHS  
15 prescriptions as they could have been prescribing medications for their patients within  
16 private hospitals, at point of care or not using their prescribing qualification. If they  
17 were not using their prescribing qualification, this may suggest that HBs need to  
18 investigate the reasons for that in order to prevent wasting the time and expenses  
19 incurred for training and failure to deliver an improved service to patients.  
20  
21  
22  
23  
24  
25  
26  
27  
28  
29  
30  
31  
32  
33  
34  
35  
36  
37  
38  
39

40 The increase in the number of NMIPs, particularly pharmacist IPs, may explain  
41 the increased rate of prescribing of medicines by these practitioners over the same  
42 period. The high number of prescribed items by NMIPs in BCUHB (34%) compared to  
43 other HBs could be explained by the high number of NMIPs in BCUHB (246 NMIPs).  
44 It is evident that the utilisation of NMIPs is inconsistent across the seven HBs in Wales,  
45 which supports previous research[16]. BCUHB and HDUHB represent the largest  
46 geographical areas in Wales compared to other HBs[38], but have the lowest number  
47 of GPs per 10,000 population (6.1 and 5.8, retrospectively)[39]. The low number of  
48 GPs in these HBs could be related to issues of recruitment, as well as the difficulty in  
49  
50  
51  
52  
53  
54  
55  
56  
57  
58  
59  
60

1  
2  
3 keeping those who are already employed in their positions[34,40]. The shortage of  
4  
5 GPs in these HBs, may explain the early adoption of non-medical independent  
6  
7 prescribing. Although PTHB showed the lowest number of items prescribed by NMIPs  
8  
9 over the study period, it is the smallest geographical area in Wales with the lowest  
10  
11 population compared to other HBs. An equivalent increase in the number of  
12  
13 prescribers and items would therefore produce a bigger percentage change than in a  
14  
15 larger HB. However, the large increase in the trend of the prescribing items in this HB  
16  
17 over the last two years of the study period may be explained by the increase in the  
18  
19 number of NMIPs. Moreover, PTHB only has primary care services, so whilst other  
20  
21 HBs may have been training IPs in both primary and secondary care settings, the  
22  
23 focus in PTHB would have been primary care only, which may have resulted in a  
24  
25 greater change. However, due to the nature of the database used, it was not possible  
26  
27 to investigate this further and this could be the focus of future work.  
28  
29  
30  
31  
32  
33

### 34 **The meaning of the study: possible explanations and implications for clinicians** 35 **and policymakers** 36 37 38 39

40 The findings of this study showed inconsistency in terms of the implementation  
41  
42 of the NMIPs' services between HBs in primary care in Wales, particularly after the  
43  
44 primary care clusters' implementation. Although there is a lack of evidence with  
45  
46 regards to the reasons and barriers behind this, some reasons that may have  
47  
48 contributed to lower utilisation of this service in some HBs may include the lack of  
49  
50 funding[16, 37, 41, 42] and lack of a plan or strategy to develop this service[37].  
51  
52 However, these studies are outdated given the pace of change. Moreover, it has not  
53  
54 been conducted in Wales in particular, which may not reflect recent practice and  
55  
56 policies in this country. Due to the lack of evidence regarding the impact of these  
57  
58  
59  
60

1  
2  
3 barriers on the implementation of non-medical independent prescribing in each HB,  
4  
5 further research is required to investigate this matter. This study provides the initial  
6  
7 evidence for such research, as well as providing the opportunity to share learning  
8  
9 among HBs.  
10  
11  
12

### 13 **Unanswered questions and future studies**

14  
15  
16  
17 This study provides a research agenda for further investigation to examine  
18  
19 questions related to efficiency, quality of prescribing, cost effectiveness, and improved  
20  
21 access to services provided by NMIPs. With the presence of some variety and  
22  
23 inconsistency in the prescribing trend of NMIPs across different HBs, this provides an  
24  
25 opportunity to share the knowledge on advanced and novel services provided by these  
26  
27 prescribers as well as to investigate the reasons behind it.  
28  
29  
30

### 31 **CONCLUSION**

32  
33  
34  
35 The number of NMIPs and their prescribing trends of medicines increased in all  
36  
37 Wales, as well as in the majority of HBs, particularly the number of pharmacist IPs  
38  
39 since the implementation of primary care clusters. This could be related to the  
40  
41 implementation of the Welsh Government Plan[17] and the introduction of primary  
42  
43 care clusters. The findings of this study may suggest that the increased number of  
44  
45 NMIPs in the primary care sector in Wales over time may help to reduce the pressure  
46  
47 on GPs and improve the skill-mix across different therapeutic areas. This aligns with  
48  
49 the main reasons for the implementation of non-medical prescribing in the UK, as  
50  
51 outlined in the second Crown Report[32]. Future studies should focus on efficiency  
52  
53 and quality of prescribing by NMIPs in primary care.  
54  
55  
56  
57  
58  
59  
60

## Acknowledgments

We would like to thank All Wales Therapeutics and Toxicology Centre (AWTTC) in Cardiff who granted the permission for the team to access the CASPA system and extract the data. Moreover, we are grateful to Taif University and the Government of Saudi Arabia represented by the Saudi Arabian Cultural Bureau (SACB) in the United Kingdom for supporting the lead author in order to conduct this project as a part of his PhD project.

For peer review only

1  
2  
3 **CONTRIBUTORSHIP STATEMENT** - SA made a substantial contribution to the  
4 conception and design of the work; the acquisition, analysis and interpretation of data;  
5 and drafting of the work. RD and KLH made a substantial contribution to the design of  
6 the work, acquisition, analysis, and interpretation of data. PD made a substantial  
7 contribution to data acquisition, analysis and interpretation. KH made a substantial  
8 contribution to the data acquisition and interpretation of data. DG made a substantial  
9 contribution to data analysis and interpretation. MC made a substantial contribution to  
10 the design of the work and interpretation of data. EH made a substantial contribution  
11 to data analysis and interpretation. All authors critically revised drafts of the work  
12 and approved the final version to be published and agree to be accountable for all  
13 aspects of the work in ensuring that questions related to the accuracy or integrity of  
14 any part of the work are appropriately investigated and resolved.  
15  
16  
17  
18  
19  
20  
21  
22  
23  
24

25 **Competing interests** - All authors the ICMJE uniform disclosure form  
26 at [www.icmje.org/coi\\_disclosure.pdf](http://www.icmje.org/coi_disclosure.pdf) and declare: no support from any organisation  
27 for the submitted work; no financial relationships with any organisations that might  
28 have an interest in the submitted work in the previous three years, no other  
29 relationships or activities that could appear to have influenced the submitted work.  
30  
31  
32  
33

34 **Funding** – NA.  
35  
36

37 **DATA SHARING STATEMENT** - No additional data available  
38  
39

40 **Transparency declaration** - The lead author affirms that the manuscript is an honest,  
41 accurate, and transparent account of the study being reported; that no important  
42 aspects of the study have been omitted; and that any discrepancies from the study as  
43 planned (and, if relevant, registered) have been explained.  
44  
45  
46  
47

48 **INTEGRITY OF THE DATA AND ACCURACY OF THE DATA ANALYSIS** - All  
49 authors had full access to all the data (including statistical reports and tables) in the  
50 study and can take responsibility for the integrity of the data and the accuracy of the  
51 data analysis.  
52  
53  
54

55 **Ethics approval** - No ethical approval required.  
56  
57  
58  
59  
60



## REFERENCES

1. Department of Health. Medicines Act 1968. 1968; DOH: London. Available at: <http://www.legislation.gov.uk/ukpga/1968/67> (last accessed 08 July 2019).
2. Craig E. A Review of Prescriptive Authority for Nurse Practitioners. *The Journal of Perinatal & Neonatal Nursing*. 1996;10(1):29-35.
3. Kroezen M, van Dijk L, Groenewegen P, et al. Nurse prescribing of medicines in Western European and Anglo-Saxon countries: a systematic review of the literature. *BMC Health Services Research*. 2011;11(1).
4. McBane S, Dopp A, Abe A, et al. Collaborative Drug Therapy Management and Comprehensive Medication Management—2015. *Pharmacotherapy: The Journal of Human Pharmacology and Drug Therapy*. 2015;35(4): e39-e50.
5. Alberta College of Pharmacists. Guide to Receiving Additional Prescribing Authorization. 2013; Alberta: 2<sup>nd</sup> edition, January. Available at: <https://pharmacists.ab.ca/sites/default/files/APAGuide.pdf> (last accessed 08 July 2019).
6. Raghunandan R, Tordoff J, Smith A. Non-medical prescribing in New Zealand: an overview of prescribing rights, service delivery models and training. *Therapeutic Advances in Drug Safety*. 2017;8(11):349-360.
7. Dunn S, Cashin A, Buckley T, et al. Nurse practitioner prescribing practice in Australia. *Journal of the American Academy of Nurse Practitioners*. 2010;22(3):150-155.
8. Department of Health. The NHS Plan: A plan for investment. A plan for reform. 2000; DOH: London: July. Available at: [http://webarchive.nationalarchives.gov.uk/20130124064356/http://www.dh.gov.uk/prod\\_consum\\_dh/groups/dh\\_digitalassets/@dh/@en/@ps/documents/digitalasset/dh\\_118522.pdf](http://webarchive.nationalarchives.gov.uk/20130124064356/http://www.dh.gov.uk/prod_consum_dh/groups/dh_digitalassets/@dh/@en/@ps/documents/digitalasset/dh_118522.pdf) (last accessed 08 July 2019).
9. Welsh Government. Non-Medical Prescribing in Wales, Guidance, Welsh Government. 2017; Cardiff. Available at: <http://www.awmsg.org/docs/awmsg/> (last accessed 08 July 2019).
10. Department of Health. Improving patients' access to medicines: A guide to implementing nurse and pharmacist independent prescribing within the NHS in England. 2006; DoH: London: April. Available at: <http://webarchive.nationalarchives.gov.uk/> (last accessed 08 July 2019).
11. Medicines Control Agency (MCA). Proposals for supplementary prescribing by nurses and pharmacists and proposed amendments to the prescription only medicines (human use) order 1997. 2002; London: MCA: MLX 284. Available at: <http://www.mhra.gov.uk/home/groups/comms-ic/documents/websiteresources/con2022567.pdf> (last accessed 08 July 2019).
12. Department of Health. Extending Independent Nurse Prescribing within the NHS in England: A guide for Implementation. 2002; DoH: London.
13. Department of Health. Optometrists to get Independent Prescribing Rights (Press Release). 2007; DOH: London.

14. Department of Health. The Medicines Act 1968 and the Human Medicines Regulations (Amendment) Order. 2013; DOH: London. Available at: [http://www.legislation.gov.uk/uksi/2013/1855/pdfs/uksi\\_20131855\\_en.pdf](http://www.legislation.gov.uk/uksi/2013/1855/pdfs/uksi_20131855_en.pdf) (last accessed 08 July 2019).
15. National Health Service (NHS) England. Allied Health Professions Medicines Project. 2016; London: NHS England. Available at: <https://www.england.nhs.uk/ahp/med-project/> (last accessed 08 July 2019).
16. Courtenay M, Khanfer R, Harries-Huntly G, et al. Overview of the uptake and implementation of non-medical prescribing in Wales: a national survey. *BMJ Open*. 2017;7(9): e015313.
17. Welsh Government. Our plan for a primary care service for Wales up to March 2018. NHS Wales. 2015; February. Available at: [http://www.cpwales.org.uk/getattachment/The-Health-Landscape/NHS-Wales-Primary-Care-Strategy/150218primaryen-pdf0-\(Updated-March-2015\).pdf.aspx?lang=en-GB](http://www.cpwales.org.uk/getattachment/The-Health-Landscape/NHS-Wales-Primary-Care-Strategy/150218primaryen-pdf0-(Updated-March-2015).pdf.aspx?lang=en-GB) (last accessed 08 July 2019).
18. Wales Audit Office. A picture of primary care in Wales. [online] Auditor General for Wales. 2018. Available at: <http://www.assembly.wales/laid%20documents/agr-ld11520/agr-ld11520-e.pdf> (last accessed 08 July 2019).
19. The National Assembly for Wales. Inquiry into Primary Care: Clusters. Cardiff: Health, Social Care and Sport Committee. 2017; October. Available at: <http://www.assembly.wales/laid%20documents/cr-ld11226/cr-ld11226-e.pdf> (last accessed 08 July 2019).
20. Royal Pharmaceutical Society Wales. Your Care, Your Medicines: Pharmacy at the heart of patient-centered care, 2015. Available at: <https://www.rpharms.com/Portals/0/RPS%20document%20library/Open%20access/Publications/Your%20Care%20Your%20Medicines%20report.pdf> (last accessed 08 July 2019).
21. Hodson K, Deslandes R, Courtenay M. Pharmacist independent prescribers can make a significant contribution to antimicrobial stewardship. *The Pharmaceutical Journal*. [online]. 2017. Available at: [https://www.pharmaceutical-journal.com/your-rps/pharmacist-independent-prescribers-can-make-a-significant-contribution-to-antimicrobial-stewardship/20202780.article#fn\\_2](https://www.pharmaceutical-journal.com/your-rps/pharmacist-independent-prescribers-can-make-a-significant-contribution-to-antimicrobial-stewardship/20202780.article#fn_2) (last accessed 08 July 2019).
22. The Welsh Government. National Health Service (Free Prescriptions and Charges for Drugs and Appliances) (Wales) Regulations. [online] *Legislation.gov.uk*. 2007. Available at: <http://www.legislation.gov.uk/wsi/2007/121/made> (last accessed 24 April 2020).
23. NHS, the Information Centre for Health and Social Care. Prescribing and Primary Care Services, Prescribing Measures and their application. Leeds: Health and Social Care Information Centre. 2012. Available at: <https://webarchive.nationalarchives.gov.uk/20180307194416/http://content.digital.nhs.uk/media/10952/Prescribing-Measures/pdf/CHttpHandler.pdf> (last accessed 12 April 2020).

- 1  
2  
3  
4  
5  
6  
7  
8  
9  
10  
11  
12  
13  
14  
15  
16  
17  
18  
19  
20  
21  
22  
23  
24  
25  
26  
27  
28  
29  
30  
31  
32  
33  
34  
35  
36  
37  
38  
39  
40  
41  
42  
43  
44  
45  
46  
47  
48  
49  
50  
51  
52  
53  
54  
55  
56  
57  
58  
59  
60
24. Welsh Government. Population estimates by local health boards and age. [online] Statswales.gov.wales. 2018. Available at: <https://statswales.gov.wales/Catalogue/Population-and-Migration/Population/Estimates/Local-Health-Boards/populationestimates-by-lhb-age> (last accessed 12 April 2020).
  25. Campbell, M. Framework for design and evaluation of complex interventions to improve health. *BMJ*. 2000; 321(7262), pp.694-696
  26. Victora C, Habicht J, and Bryce J. Evidence-Based Public Health: Moving Beyond Randomized Trials. *American Journal of Public Health*. 2004; 94(3), pp.400-405
  27. Bonell CP, Hargreaves J, Cousens S, et al. Alternatives to randomisation in the evaluation of public health interventions: design challenges and solutions. *Journal of Epidemiology & Community Health*. 2011; Jul 1;65(7):582-7.
  28. Linden A. Conducting interrupted time-series analysis for single-and multiple-group comparisons. *The Stata Journal*. 2015 Jun;15(2):480-500.
  29. Field, A. *Discovering statistics using IBM SPSS statistics*. 2018; 5th ed. Los Angeles: [i5 pozostałych]: Sage edge.
  30. Ramsay CR, Matowe L, Grilli R, et al. Interrupted time series designs in health technology assessment: lessons from two systematic reviews of behaviour change strategies. *International Journal of Technology Assessment in Health Care*. 2003; 19(04), pp.613-623.
  31. Bernal JL, Cummins S, Gasparrini A. Interrupted time series regression for the evaluation of public health interventions: a tutorial. *International Journal of Epidemiology*. 2016; 46(1), pp. 348-355. doi: 10.1093/ije/dyw098.
  32. Department of Health. Review of Prescribing, Supply and Administration of Medicines. Final Report (Crown II Report). 1999; London: DOH.
  33. Courtenay M, Carey N, Stenner K. An overview of non-medical prescribing across one strategic health authority: a questionnaire survey. *BMC Health Services Research*. 2012;12(1).
  34. Brennan S. North Wales facing GP 'recruitment crisis' leading doctor warns. [online] Daily Post Wales. 2017. Available at: <https://www.dailypost.co.uk/news/north-wales-news/gp-surgeries-recruitment-crisis-jessup-13453024> (last accessed 08 July 2019).
  35. Courtenay M. An overview of developments in nurse prescribing in the UK. *Nursing Standard*. 2018;33(1):40-44.
  36. GPhC (General Pharmaceutical Council). Prescribers survey report. UK: London. 2016. Available at: [https://www.pharmacyregulation.org/sites/default/files/gphc\\_prescribers\\_survey\\_report.pdf](https://www.pharmacyregulation.org/sites/default/files/gphc_prescribers_survey_report.pdf) (last accessed 08 July 2019)
  37. Latter S, Blenkinsopp A, Smit A, et al. Evaluation of nurse and pharmacist independent prescribing. Department of Health Policy Research Programme Project 016 0108 (October 2010): University of Southampton and Keele University. 2011; Available at: <https://eprints.soton.ac.uk/184777/3/ENPIPfullreport.pdf> (last accessed 08 July 2019).

- 1  
2  
3  
4  
5  
6  
7  
8  
9  
10  
11  
12  
13  
14  
15  
16  
17  
18  
19  
20  
21  
22  
23  
24  
25  
26  
27  
28  
29  
30  
31  
32  
33  
34  
35  
36  
37  
38  
39  
40  
41  
42  
43  
44  
45  
46  
47  
48  
49  
50  
51  
52  
53  
54  
55  
56  
57  
58  
59  
60
38. NHS Wales. Public Health Wales Observatory | Wales and its Local Health Boards: Demography Profile. [online]. 2017; Available at: <http://www.publichealthwalesobservatory.wales.nhs.uk/wales-local-health-boards-demography-profile> (last accessed 2 May 2019).
  39. Welsh Government. Local Health Board comparisons of GP workforce by year. 2018; Available at: <https://statswales.gov.wales/Catalogue/Health-and-Social-Care/General-Medical-Services/localhealthboardcomparisonsofgpworkforce-by-year> (last accessed 2 May 2019).
  40. Jones M. More than 8,000 people will be served by just three GPs as another North Wales surgery closes. [online] Daily Post Wales. 2017. Available at: <https://www.dailypost.co.uk/news/more-8000-people-served-just-13905020> (last accessed 08 July 2019).
  41. Cooper RJ, Anderson C, Avery T, et al. Nurse and pharmacist supplementary prescribing in the UK--a thematic review of the literature. *Health Policy*. 2008; 85(3), pp. 277-292. doi: 10.1016/j.healthpol.2007.07.016.
  42. Hacking S. and Taylor J. An evaluation of the scope and practice of Non-Medical Prescribing in the North West for NHS North West. 2010; Lancashire. NHS North West. Available at: [https://www.researchgate.net/profile/Suzanne\\_Hacking/publication/](https://www.researchgate.net/profile/Suzanne_Hacking/publication/) (last accessed 17 May 2018).

1  
2  
3 *Figure 1 Trend of the total number of items per 100,000 population prescribed by all*  
4 *prescribers in primary care in Wales and dispensed in community pharmacies by year*  
5  
6  
7  
8

9  
10 *Figure 2 Observed and predicted dispensed prescriptions in primary care by NMIPs*  
11 *prior to and following the implementation of primary care clusters in October 2015*  
12 *(All Wales)*  
13  
14  
15  
16

17 *Figure 3 The total number of NMIPs (pharmacists, nurses and physiotherapists) who*  
18 *prescribed at least one item from April 2011 to March 2018 in primary care in Wales*  
19 *in different HBs*  
20

21 \* **ABMUHB** (Abertawe Bro Morgannwg University HB); **ABUHB** (Aneurin Bevan  
22 University HB); **BCUHB** (Betsi Cadwaladr University HB); **CTMUHB** (Cwm Taf  
23 Morgannwg University HB); **CVUHB** (Cardiff and Vale University HB); **HDUHB**  
24 (Hywel Dda University HB); **PTHB** (Powys Teaching HB)  
25  
26  
27  
28  
29  
30

31 *Figure 4 Trend of the total number of dispensed items per 100,000 population*  
32 *prescribed by NMIPs in primary care by health board (dashed line denotes*  
33 *introduction of primary care clusters in October 2015)*  
34  
35  
36  
37

38 *Figure 5 Trend of the total number of dispensed items per 100,000 population*  
39 *prescribed by NMIPs in primary care by health board (dashed line denotes*  
40 *introduction of primary care clusters in October 2015) \**  
41

42 \* Final seven outlying data points in Powys Teaching Health Board removed to  
43 illustrate trends in other Health Boards.  
44  
45  
46  
47  
48  
49  
50  
51  
52  
53  
54  
55  
56  
57  
58  
59  
60

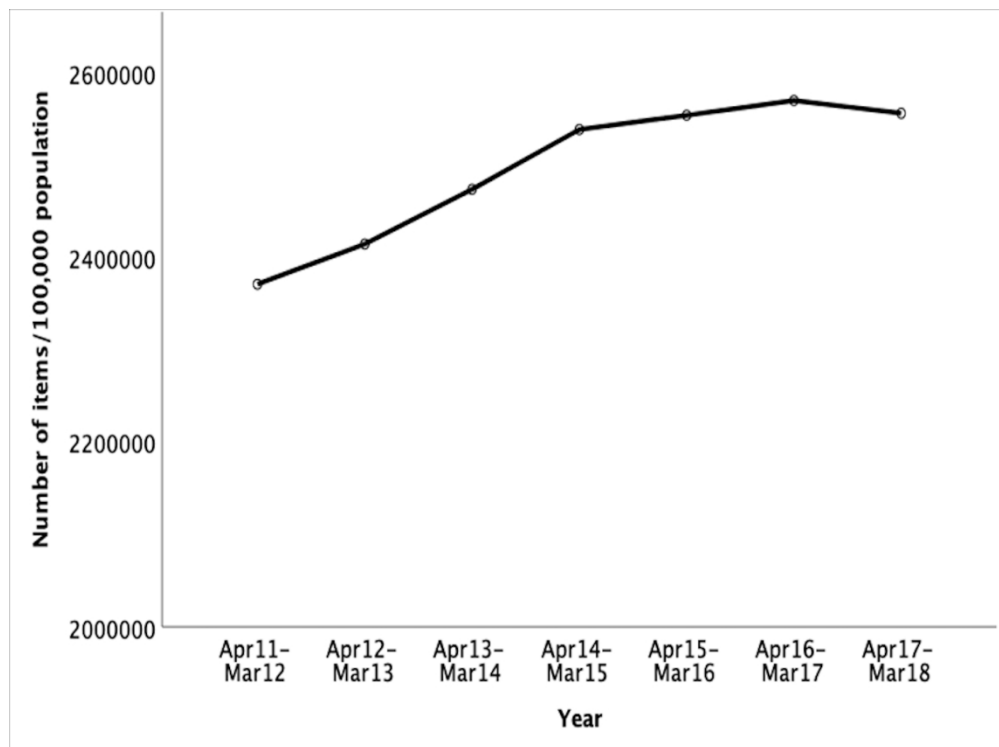

Figure 1 Trend of the total number of items per 100,000 population prescribed by all prescribers in primary care in Wales and dispensed in community pharmacies by year

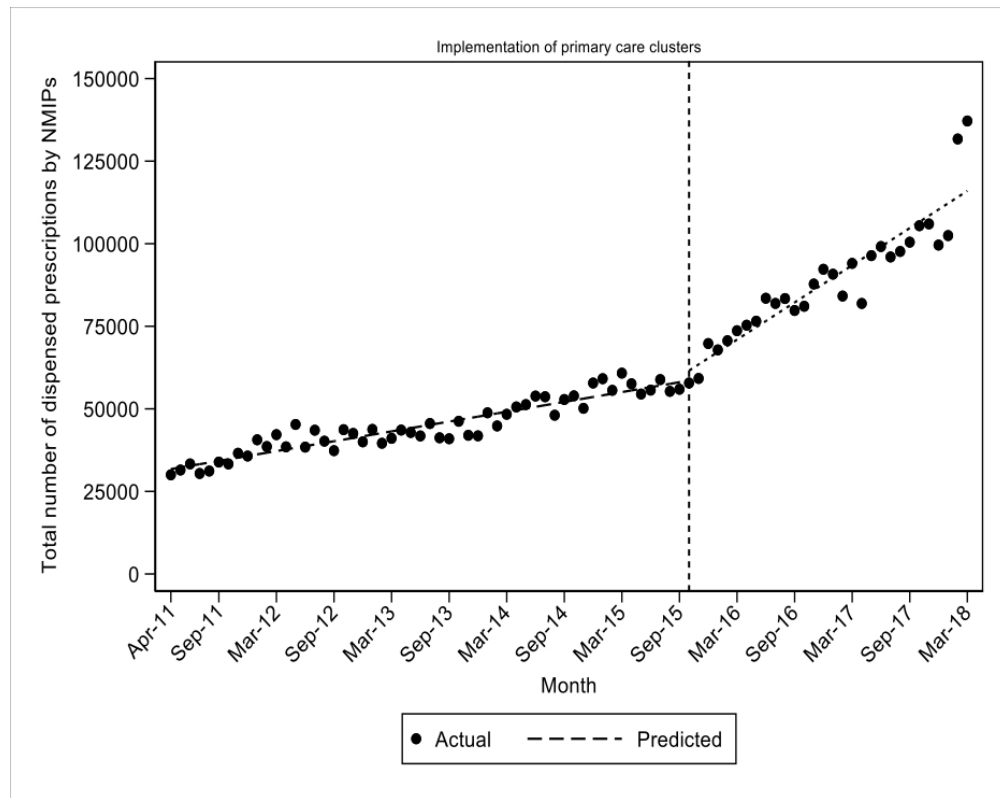

32 Figure 2 Observed and predicted dispensed prescriptions in primary care by NMIPs prior to and following the  
33 implementation of primary care clusters in October 2015 (All Wales)  
34  
35  
36  
37  
38  
39  
40  
41  
42  
43  
44  
45  
46  
47  
48  
49  
50  
51  
52  
53  
54  
55  
56  
57  
58  
59  
60

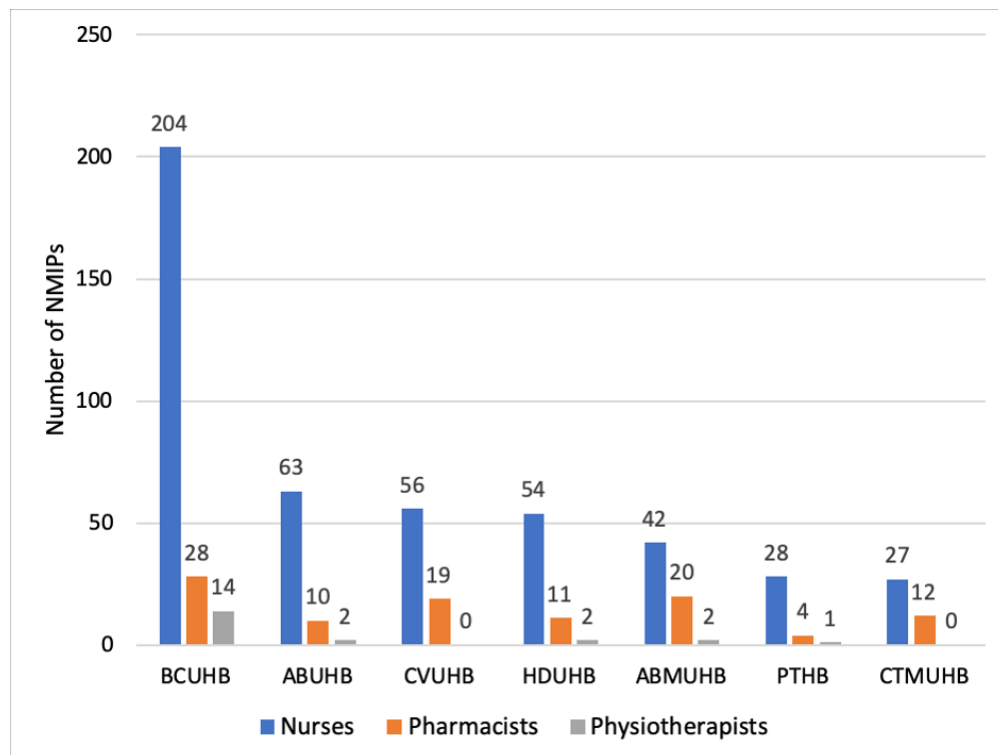

Figure 3 The total number of NMIPs (pharmacists, nurses and physiotherapists) who prescribed at least one item from April 2011 to March 2018 in primary care in Wales in different HBs

\*ABMUHB (Abertawe Bro Morgannwg University HB); ABUHB (Aneurin Bevan University HB); BCUHB (Betsi Cadwaladr University HB); CTMUHB (Cwm Taf Morgannwg University HB); CVUHB (Cardiff and Vale University HB); HDUHB (Hywel Dda University HB); PTHB (Powys Teaching HB)



1  
2  
3  
4  
5  
6  
7  
8  
9  
10  
11  
12  
13  
14  
15  
16  
17  
18  
19  
20  
21  
22  
23  
24  
25  
26  
27  
28  
29  
30  
31  
32  
33  
34  
35  
36  
37  
38  
39  
40  
41  
42  
43  
44  
45  
46  
47  
48  
49  
50  
51  
52  
53  
54  
55  
56  
57  
58  
59  
60

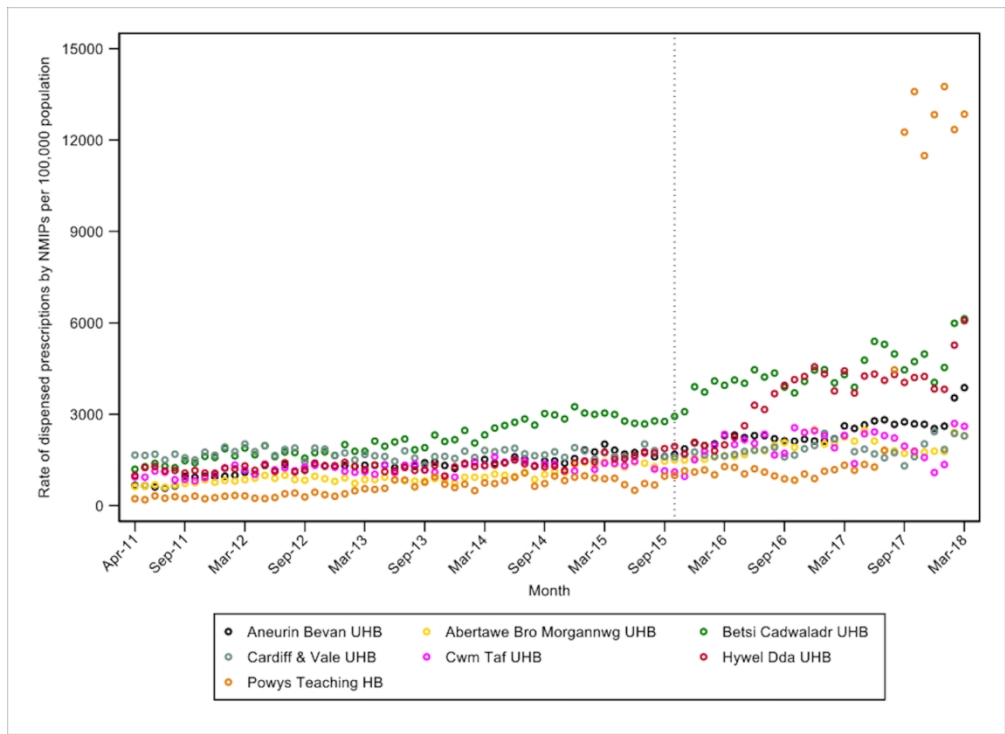

Figure 4 Trend of the total number of dispensed items per 100,000 population prescribed by NMIPs in primary care by health board (dashed line denotes the introduction of primary care clusters in October 2015)

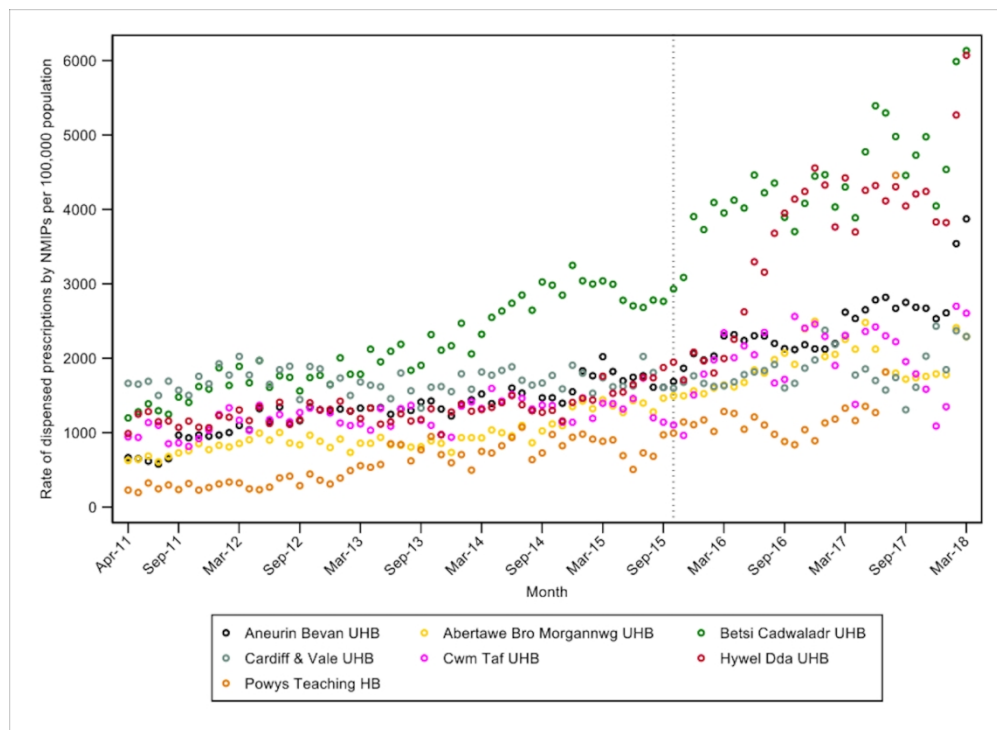

Figure 5 Trend of the total number of dispensed items per 100,000 population prescribed by NMIPs in primary care by health board (dashed line denotes introduction of primary care clusters in October 2015) \*  
 \*Final seven outlying data points in Powys Teaching Health Board removed to illustrate trends in other Health Boards.

1  
2  
3 **Prescribing trends over time by non-medical independent prescribers (NMIPs) in primary care**  
4 **settings across Wales (2011-2018): a secondary database analysis**  
5

6 **Supplementary material**  
7

8 **Health board trends in dispensed prescriptions by non-medical prescribers across health boards in**  
9 **Wales**  
10

11 **Table S1:** Health Board-specific parameter estimates from the interrupted time series analysis  
12 examining the change in level and slope of dispensed prescriptions in primary care by NMIPs following  
13 the implementation of primary care clusters in October 2015 (N = 84 months) \*  
14

| Health board                                           | Variable                | Coefficient | Lower 95% CI | Upper 95% CI | p-value |
|--------------------------------------------------------|-------------------------|-------------|--------------|--------------|---------|
| Aneurin Bevan University Health Board                  | Intercept               | 4639.4      | 4019.8       | 5259.0       | <0.001  |
|                                                        | Pre-intervention slope  | 109.9       | 89.7         | 130.1        | <0.001  |
|                                                        | Level change            | -27.5       | -1321.8      | 1266.8       | 0.966   |
|                                                        | Post-intervention slope | 144.7       | 40.9         | 248.5        | 0.007   |
| Abertawe Bro Morgannwg University Health Board (lag 3) | Intercept               | 3268.9      | 2833.5       | 3704.3       | <0.001  |
|                                                        | Pre-intervention slope  | 65.4        | 47.2         | 83.6         | <0.001  |
|                                                        | Level change            | 1954.3      | 534.6        | 3374.0       | 0.008   |
|                                                        | Post-intervention slope | 28.6        | -52.4        | 109.7        | 0.484   |
| Betsi Cadwaladr University Health Board                | Intercept               | 8480.1      | 7791.3       | 9168.9       | <0.001  |
|                                                        | Pre-intervention slope  | 239.7       | 208.3        | 271.1        | <0.001  |
|                                                        | Level change            | 2634.6      | 3.1          | 5266.0       | 0.050   |
|                                                        | Post-intervention slope | 195.4       | 2.7          | 388.1        | 0.047   |
| Cardiff and Vale University Health Board (lag 8)       | Intercept               | 7976.3      | 7458.2       | 8494.4       | <0.001  |
|                                                        | Pre-intervention slope  | 6.1         | -6.6         | 18.9         | 0.342   |
|                                                        | Level change            | -266.1      | -876.5       | 344.4        | 0.388   |
|                                                        | Post-intervention slope | 65.4        | 12.6         | 118.1        | 0.016   |
| Cwm Taf University Health Board (lag 4)                | Intercept               | 2998.4      | 2689.6       | 3307.4       | <0.001  |
|                                                        | Pre-intervention slope  | 22.7        | 13.1         | 32.3         | <0.001  |
|                                                        | Level change            | 1104.3      | -310.2       | 2518.7       | 0.124   |
|                                                        | Post-intervention slope | 16.6        | -75.0        | 108.2        | 0.720   |

15  
16  
17  
18  
19  
20  
21  
22  
23  
24  
25  
26  
27  
28  
29  
30  
31  
32  
33  
34  
35  
36  
37  
38  
39  
40  
41 \*Models fitted with a lag of order 1 unless otherwise specified. Note that linear modelling assumptions  
42 were not fulfilled for Hywel Dda and Powys Health Boards and Findings are illustrated graphically in  
43 Figures S6 and S7.  
44  
45  
46  
47  
48  
49  
50  
51  
52  
53  
54  
55  
56  
57  
58  
59  
60

**Table S2:** Comparison between actual and counterfactual dispensed prescriptions in primary care by NMIPs\*

| Health board                                   | Estimate                          | Coefficient | Lower 95% CI | Upper 95% CI |
|------------------------------------------------|-----------------------------------|-------------|--------------|--------------|
| All Wales                                      | Absolute difference at March 2018 | 44415.5     | 34086.8      | 54744.1      |
|                                                | Relative difference at March 2018 | 60.5        | 45.6         | 75.3         |
| Aneurin Bevan University Health Board          | Absolute difference at March 2018 | 4313.3      | 1924.1       | 6702.5       |
|                                                | Relative difference at March 2018 | 31.1        | 12.7         | 49.5         |
| Abertawe Bro Morgannwg University Health Board | Absolute difference at March 2018 | 2813.2      | 751.1        | 4875.4       |
|                                                | Relative difference at March 2018 | 32.1        | 6.1          | 58.1         |
| Betsi Cadwaladr University Health Board        | Absolute difference at March 2018 | 8496.7      | 4136.1       | 12857.3      |
|                                                | Relative difference at March 2018 | 29.7        | 13.5         | 45.9         |
| Cardiff and Vale University Health Board       | Absolute difference at March 2018 | 1694.8      | 332.9        | 3056.7       |
|                                                | Relative difference at March 2018 | 20.0        | 3.4          | 36.5         |
| Cwm Taf University Health Board                | Absolute difference at March 2018 | 1601.9      | -78.1        | 3281.9       |
|                                                | Relative difference at March 2018 | 32.7        | -2.9         | 68.2         |

\*The counterfactual represents predicted values and trends in the absence of the implementation of primary care clusters in October 2015 (i.e. making the assumption that pre-implementation trends would have continued in the same way).

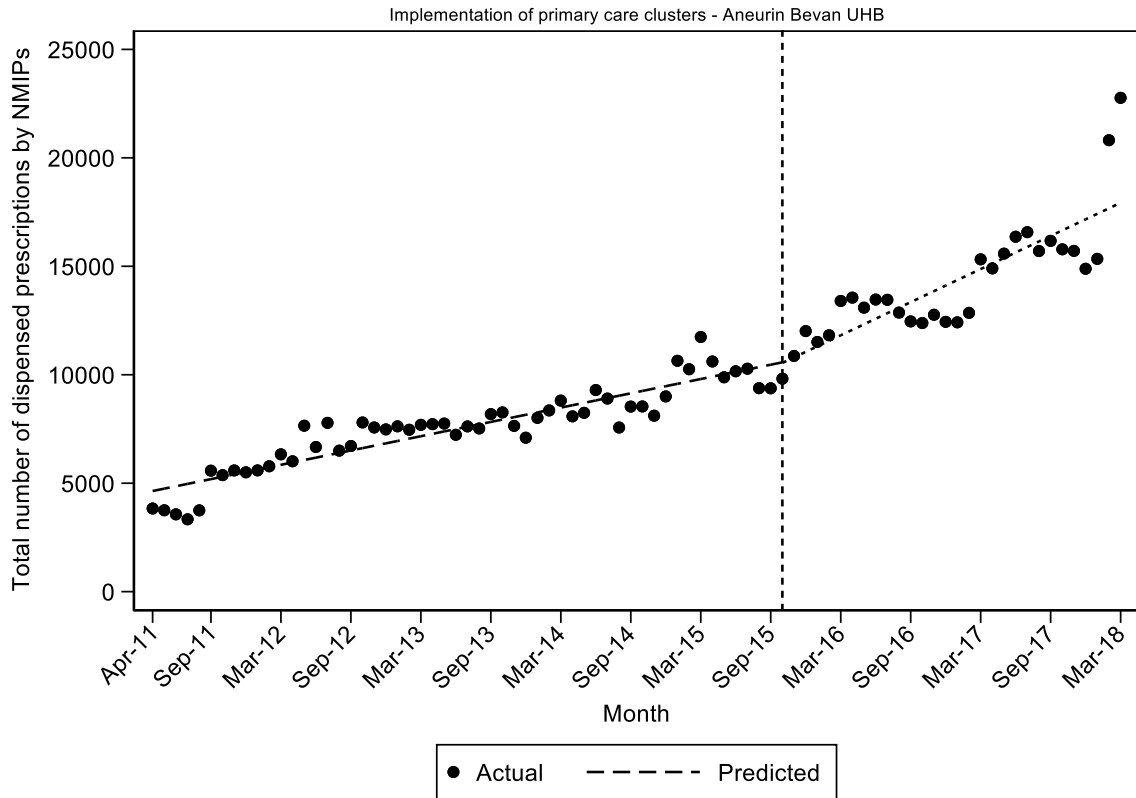

**Figure S1:** Observed and predicted dispensed prescriptions in primary care by NMIPs prior to and following the implementation of primary care clusters in October 2015 (Aneurin Bevan University Health Board)

View only

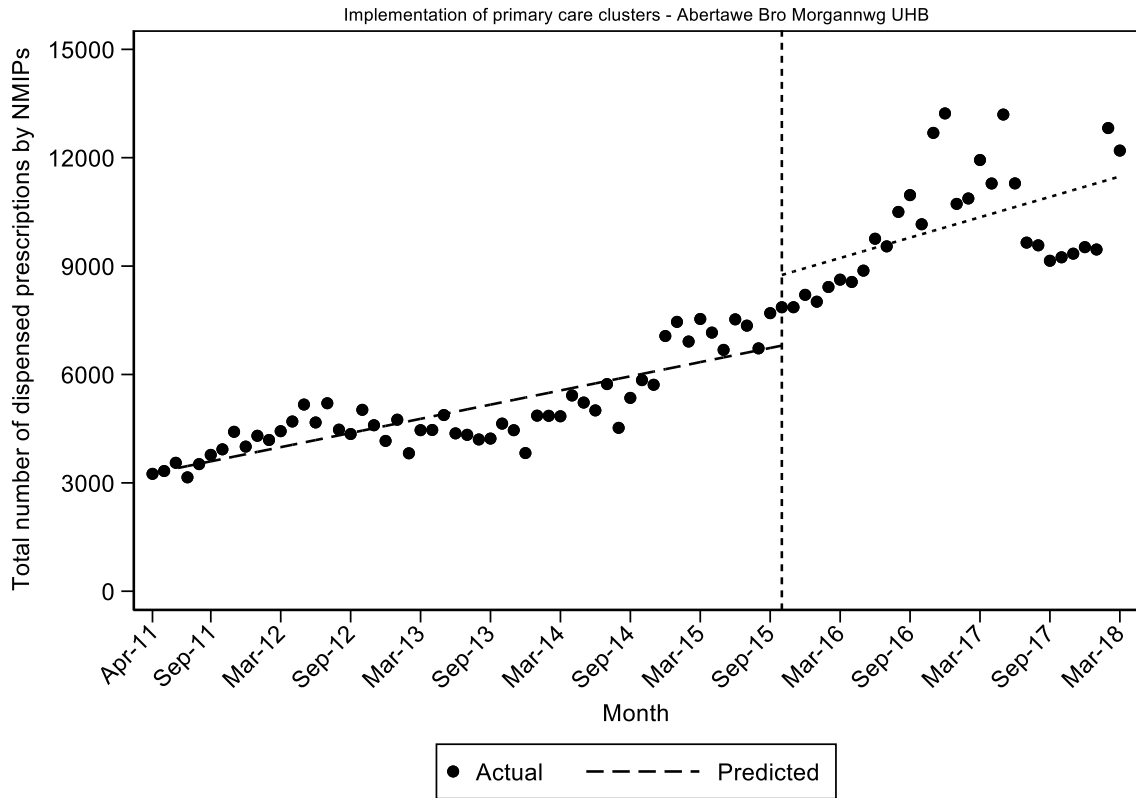

**Figure S2:** Observed and predicted dispensed prescriptions in primary care by NMIPs prior to and following the implementation of primary care clusters in October 2015 (Abertawe Bro Morgannwg University Health Board)

Preview only

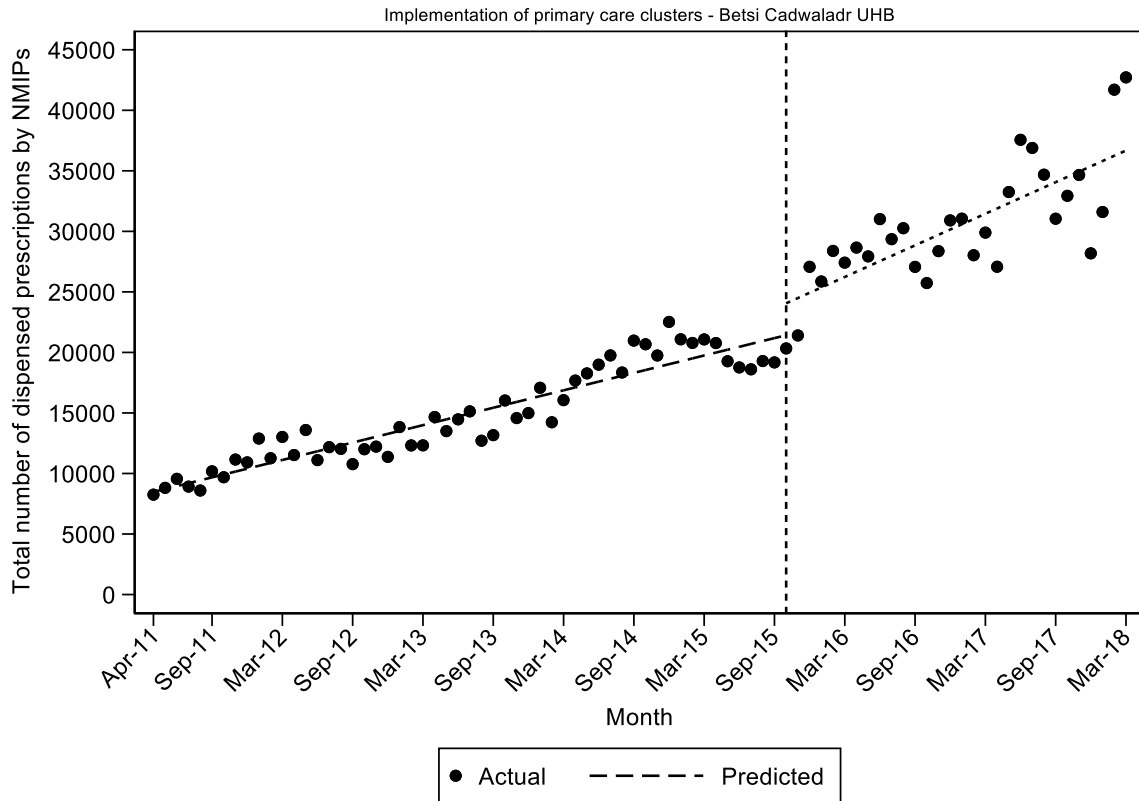

**Figure S3:** Observed and predicted dispensed prescriptions in primary care by NMIPs prior to and following the implementation of primary care clusters in October 2015 (Betsi Cadwaladr University Health Board)

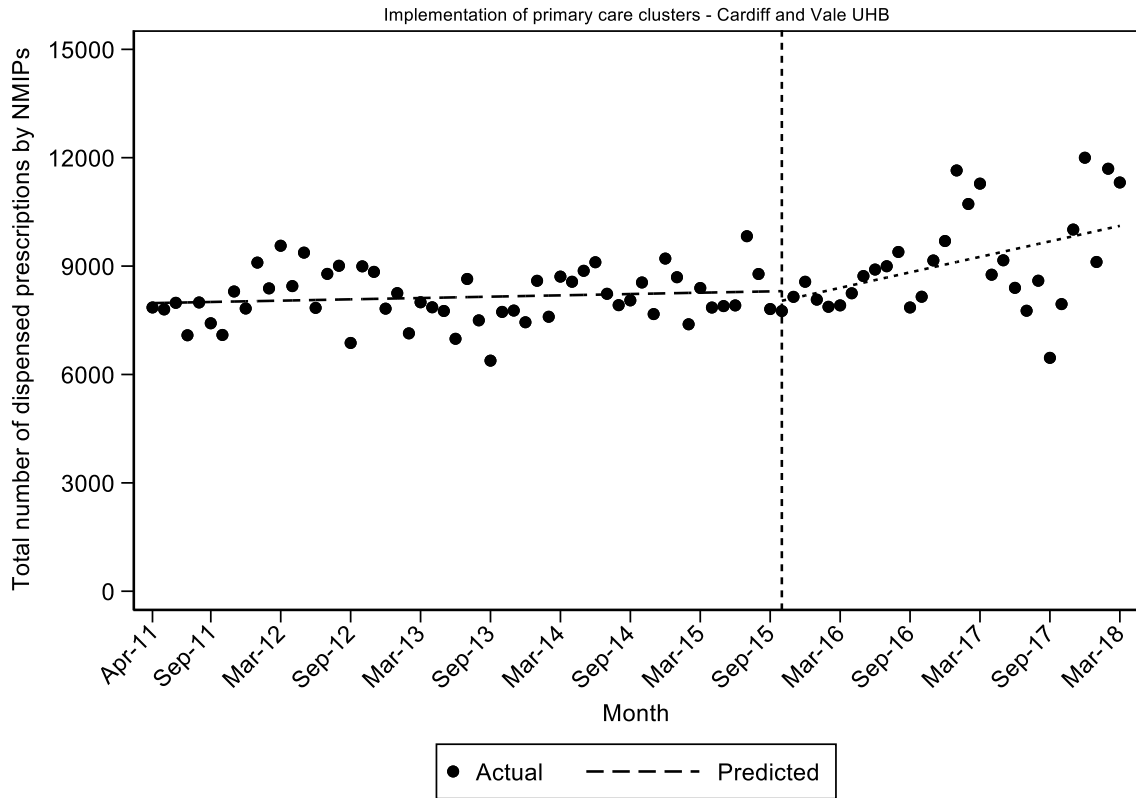

**Figure S4:** Observed and predicted dispensed prescriptions in primary care by NMIPs prior to and following the implementation of primary care clusters in October 2015 (Cardiff and Vale University Health Board)

View only



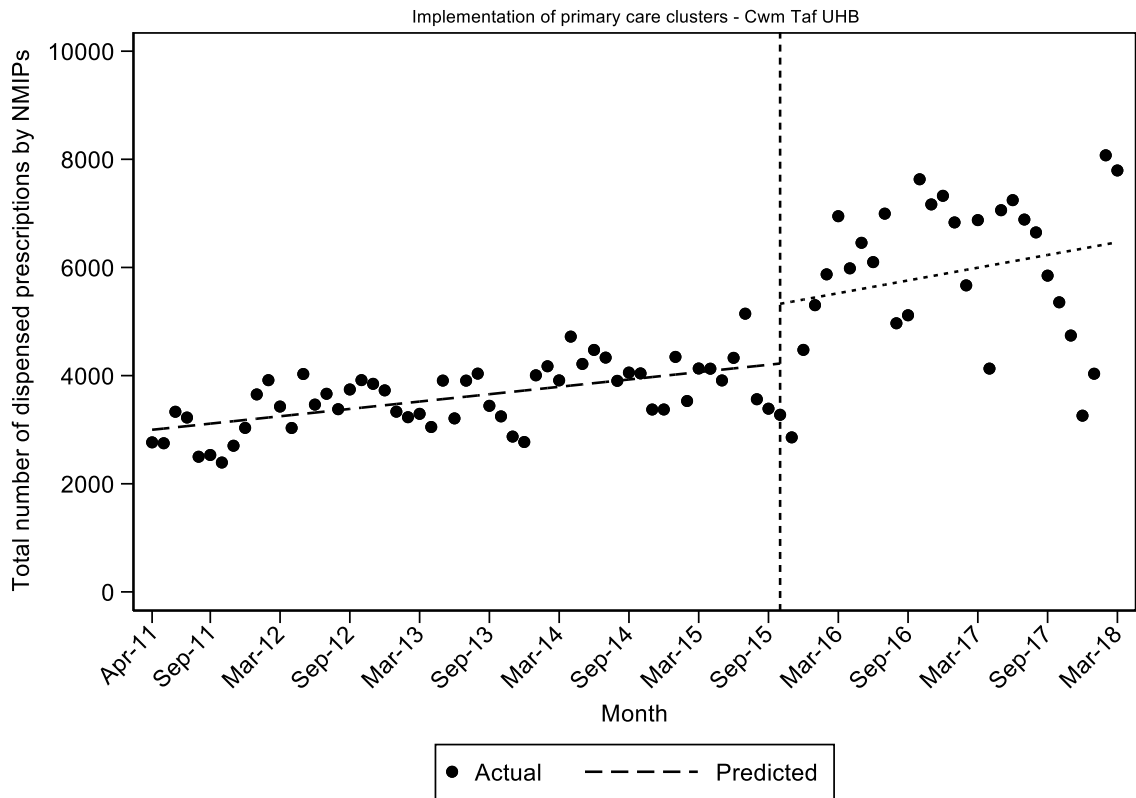

**Figure S5:** Observed and predicted dispensed prescriptions in primary care by NMIPs prior to and following the implementation of primary care clusters in October 2015 (Cwm Taf University Health Board)

View only

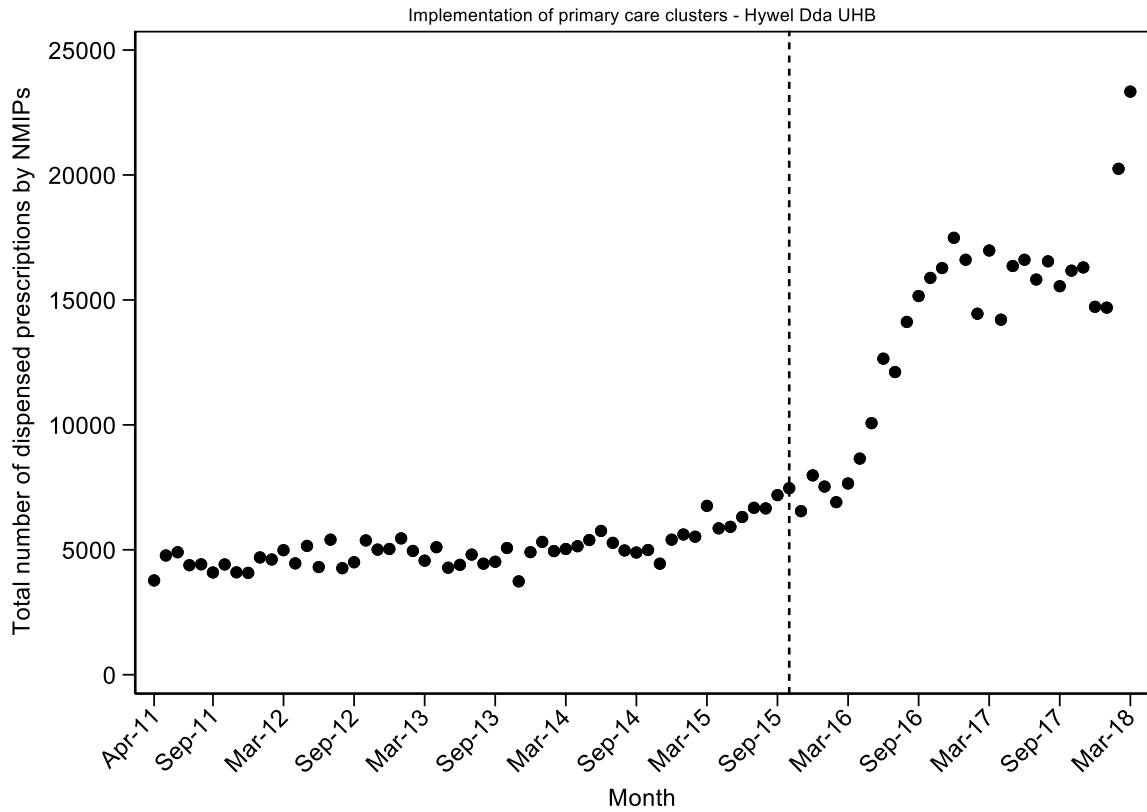

**Figure S6:** Observed dispensed prescriptions in primary care by NMIPs prior to and following the implementation of primary care clusters in October 2015 (Hywel Dda University Health Board)

Review only

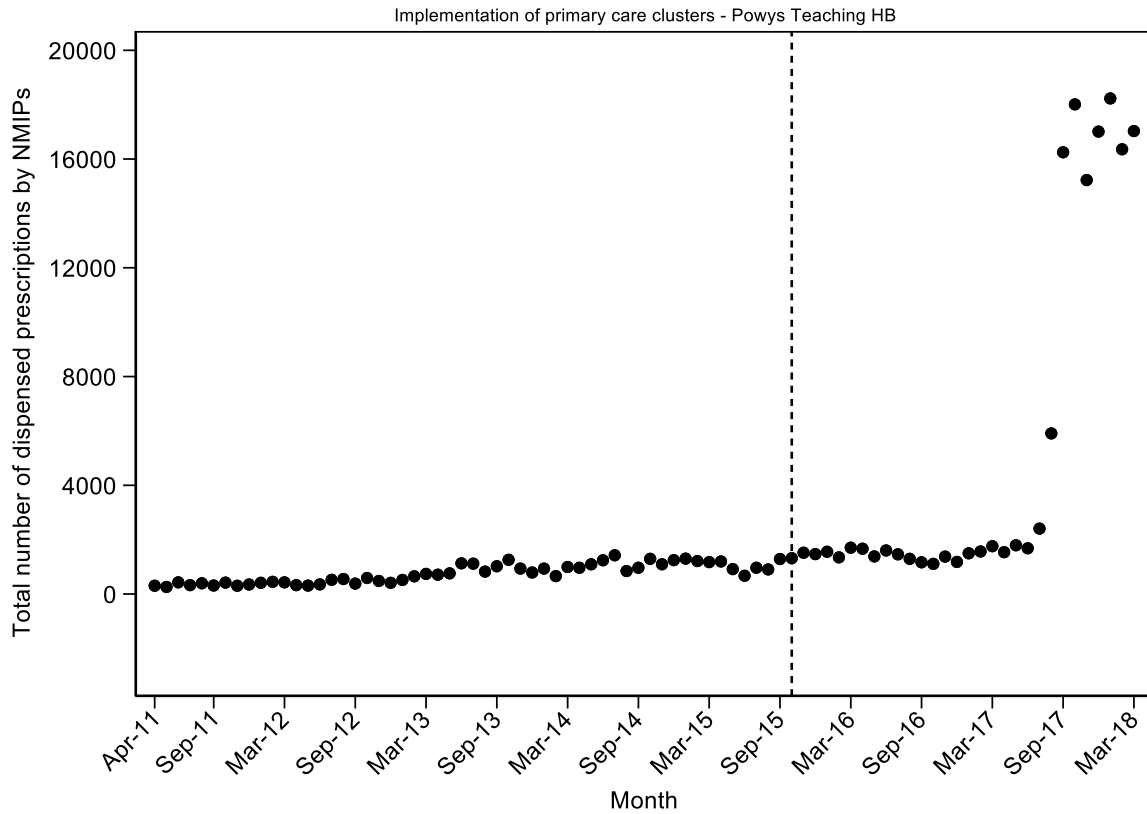

**Figure S7:** Observed dispensed prescriptions in primary care by NMIPs prior to and following the implementation of primary care clusters in October 2015 (Powys Teaching Health Board)

Review only

**Sensitivity analysis 1:** Excluding Powys teaching health board from the All Wales analysis

**Table S3:** All Wales analysis excluding Powys Teaching Health Board

| Variable                | Coefficient | Lower 95% CI | Upper 95% CI | p-value |
|-------------------------|-------------|--------------|--------------|---------|
| Intercept               | 31490.9     | 29914.3      | 33067.5      | <0.001  |
| Pre-intervention slope  | 477.5       | 426.4        | 528.5        | <0.001  |
| Level change            | 7353.0      | 1450.0       | 13255.9      | 0.015   |
| Post-intervention slope | 826.4       | 314.7        | 1338.1       | 0.002   |

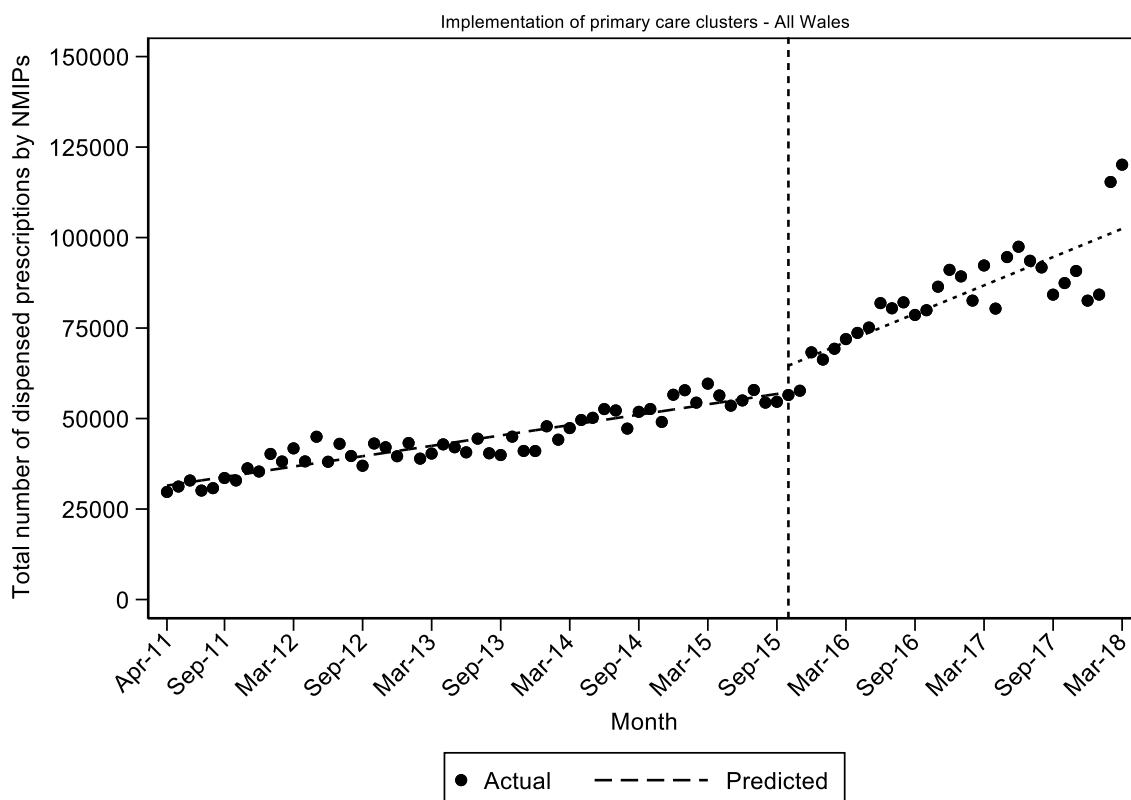

**Figure S8:** Observed and predicted dispensed prescriptions in primary care by NMIPs prior to and following the implementation of primary care clusters in October 2015 (All Wales, excluding Powys Teaching Health Board)

**Sensitivity analysis 2:** Excluding Powys teaching health board and the final two months of data points from the All Wales analysis

**Table S4:** All Wales analysis excluding Powys Teaching Health Board and the final two months of observations

| Variable                | Coefficient | Lower 95% CI | Upper 95% CI | p-value |
|-------------------------|-------------|--------------|--------------|---------|
| Intercept               | 31490.9     | 29489.3      | 33492.6      | <0.001  |
| Pre-intervention slope  | 477.5       | 416.1        | 538.8        | <0.001  |
| Level change            | 9762.5      | 2570.3       | 16954.6      | 0.008   |
| Post-intervention slope | 563.5       | 44.0         | 1083.1       | 0.034   |

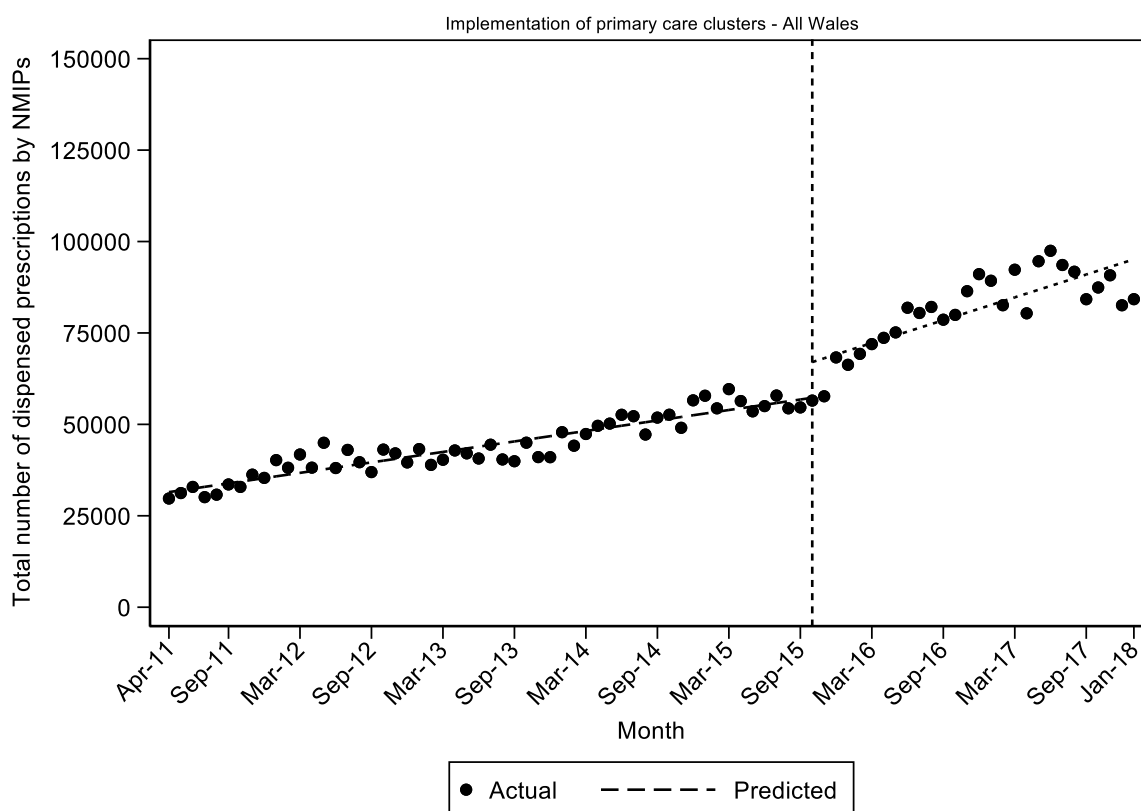

**Figure S9:** Observed and predicted dispensed prescriptions in primary care by NMIPs prior to and following the implementation of primary care clusters in October 2015 (All Wales, excluding Powys Teaching Health Board and the final two months of observations)

Findings were robust to the two sensitivity analyses 1: excluding PTHB (Table S3 and Figure S8) and 2: excluding PTHB and the final two months of observations (Table S4 and Figure S9) as presented above.
