# Supplementary material for: Prescribing trends over time by non-medical independent prescribers in primary care settings across Wales (2011–2018): a secondary database analysis
Source: PubMed Central journal article supplement — BMJ Open. 2020 Oct 13;10(10):e036379. doi: 10.1136/bmjopen-2019-036379 (PMC7554451; doi:10.1136/bmjopen-2019-036379), 2020-10-13
Supplement: bmjopen-2019-036379supp001.pdf [file bmjopen-2019-036379supp001.pdf]

**Prescribing trends over time by non-medical independent prescribers (NMIPs) in primary care settings across Wales (2011-2018): a secondary database analysis**

**Supplementary material**

**Health board trends in dispensed prescriptions by non-medical prescribers across health boards in Wales**

**Table S1:** Health Board-specific parameter estimates from the interrupted time series analysis examining the change in level and slope of dispensed prescriptions in primary care by NMIPs following the implementation of primary care clusters in October 2015 (N = 84 months) \*

| Health board                                           | Variable                | Coefficient | Lower 95% CI | Upper 95% CI | p-value |
|--------------------------------------------------------|-------------------------|-------------|--------------|--------------|---------|
| Aneurin Bevan University Health Board                  | Intercept               | 4639.4      | 4019.8       | 5259.0       | <0.001  |
|                                                        | Pre-intervention slope  | 109.9       | 89.7         | 130.1        | <0.001  |
|                                                        | Level change            | -27.5       | -1321.8      | 1266.8       | 0.966   |
|                                                        | Post-intervention slope | 144.7       | 40.9         | 248.5        | 0.007   |
| Abertawe Bro Morgannwg University Health Board (lag 3) | Intercept               | 3268.9      | 2833.5       | 3704.3       | <0.001  |
|                                                        | Pre-intervention slope  | 65.4        | 47.2         | 83.6         | <0.001  |
|                                                        | Level change            | 1954.3      | 534.6        | 3374.0       | 0.008   |
|                                                        | Post-intervention slope | 28.6        | -52.4        | 109.7        | 0.484   |
| Betsi Cadwaladr University Health Board                | Intercept               | 8480.1      | 7791.3       | 9168.9       | <0.001  |
|                                                        | Pre-intervention slope  | 239.7       | 208.3        | 271.1        | <0.001  |
|                                                        | Level change            | 2634.6      | 3.1          | 5266.0       | 0.050   |
|                                                        | Post-intervention slope | 195.4       | 2.7          | 388.1        | 0.047   |
| Cardiff and Vale University Health Board (lag 8)       | Intercept               | 7976.3      | 7458.2       | 8494.4       | <0.001  |
|                                                        | Pre-intervention slope  | 6.1         | -6.6         | 18.9         | 0.342   |
|                                                        | Level change            | -266.1      | -876.5       | 344.4        | 0.388   |
|                                                        | Post-intervention slope | 65.4        | 12.6         | 118.1        | 0.016   |
| Cwm Taf University Health Board (lag 4)                | Intercept               | 2998.4      | 2689.6       | 3307.4       | <0.001  |
|                                                        | Pre-intervention slope  | 22.7        | 13.1         | 32.3         | <0.001  |
|                                                        | Level change            | 1104.3      | -310.2       | 2518.7       | 0.124   |
|                                                        | Post-intervention slope | 16.6        | -75.0        | 108.2        | 0.720   |

\*Models fitted with a lag of order 1 unless otherwise specified. Note that linear modelling assumptions were not fulfilled for Hywel Dda and Powys Health Boards and Findings are illustrated graphically in Figures S6 and S7.

**Table S2:** Comparison between actual and counterfactual dispensed prescriptions in primary care by NMIPs\*

| Health board                                   | Estimate                          | Coefficient | Lower 95% CI | Upper 95% CI |
|------------------------------------------------|-----------------------------------|-------------|--------------|--------------|
| All Wales                                      | Absolute difference at March 2018 | 44415.5     | 34086.8      | 54744.1      |
|                                                | Relative difference at March 2018 | 60.5        | 45.6         | 75.3         |
| Aneurin Bevan University Health Board          | Absolute difference at March 2018 | 4313.3      | 1924.1       | 6702.5       |
|                                                | Relative difference at March 2018 | 31.1        | 12.7         | 49.5         |
| Abertawe Bro Morgannwg University Health Board | Absolute difference at March 2018 | 2813.2      | 751.1        | 4875.4       |
|                                                | Relative difference at March 2018 | 32.1        | 6.1          | 58.1         |
| Betsi Cadwaladr University Health Board        | Absolute difference at March 2018 | 8496.7      | 4136.1       | 12857.3      |
|                                                | Relative difference at March 2018 | 29.7        | 13.5         | 45.9         |
| Cardiff and Vale University Health Board       | Absolute difference at March 2018 | 1694.8      | 332.9        | 3056.7       |
|                                                | Relative difference at March 2018 | 20.0        | 3.4          | 36.5         |
| Cwm Taf University Health Board                | Absolute difference at March 2018 | 1601.9      | -78.1        | 3281.9       |
|                                                | Relative difference at March 2018 | 32.7        | -2.9         | 68.2         |

\*The counterfactual represents predicted values and trends in the absence of the implementation of primary care clusters in October 2015 (i.e. making the assumption that pre-implementation trends would have continued in the same way).

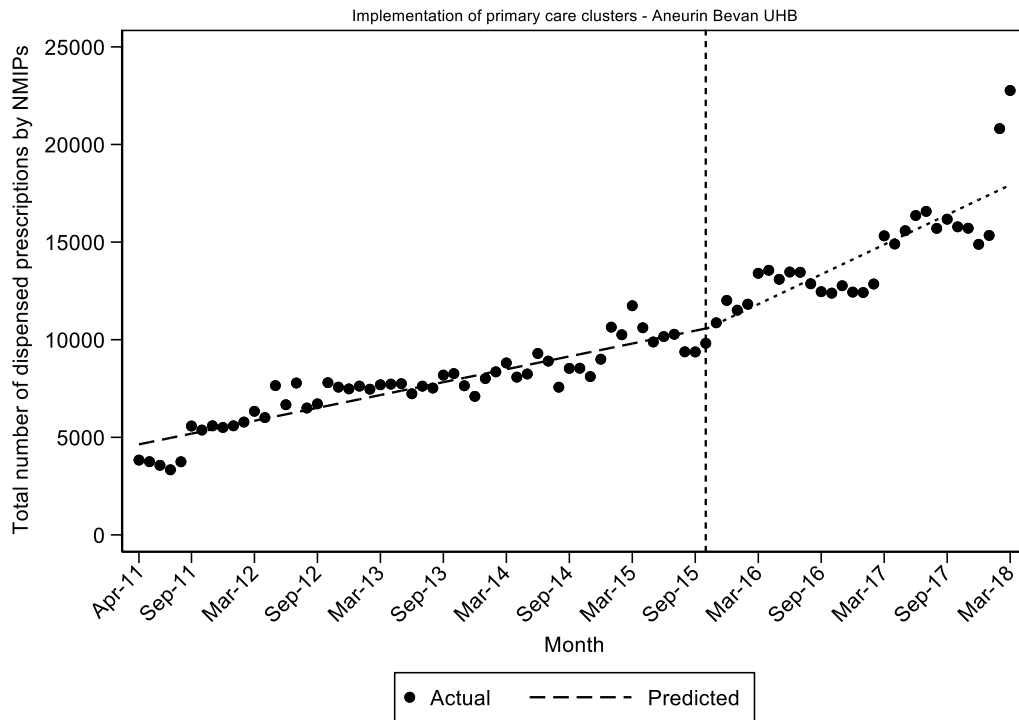

**Figure S1:** Observed and predicted dispensed prescriptions in primary care by NMIPs prior to and following the implementation of primary care clusters in October 2015 (Aneurin Bevan University Health Board)

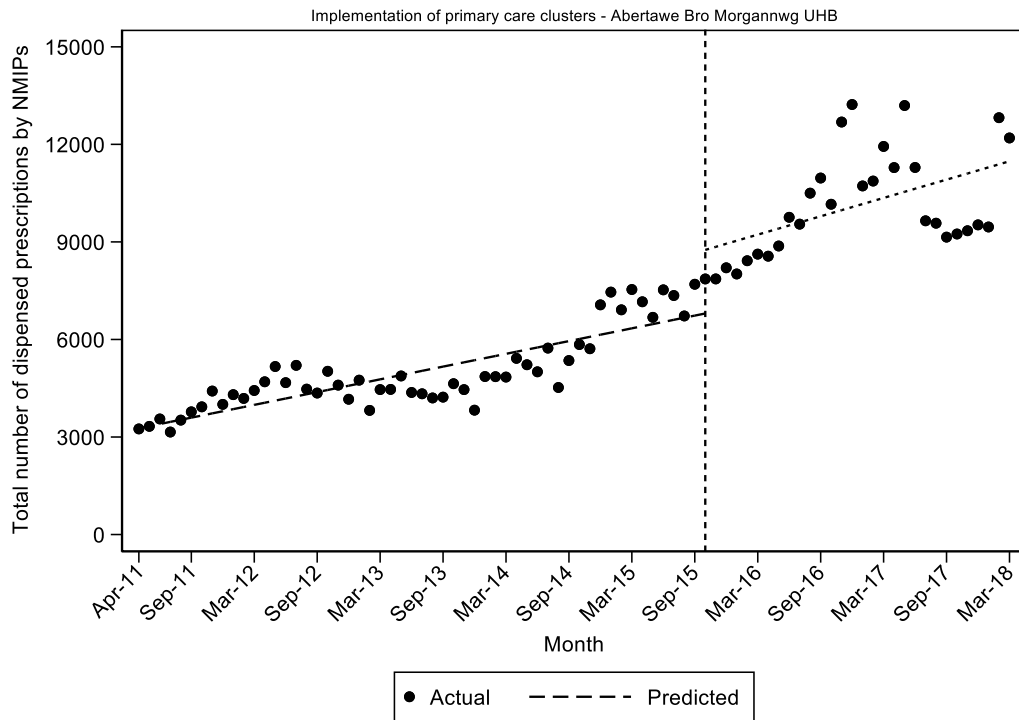

**Figure S2:** Observed and predicted dispensed prescriptions in primary care by NMIPs prior to and following the implementation of primary care clusters in October 2015 (Abertawe Bro Morgannwg University Health Board)

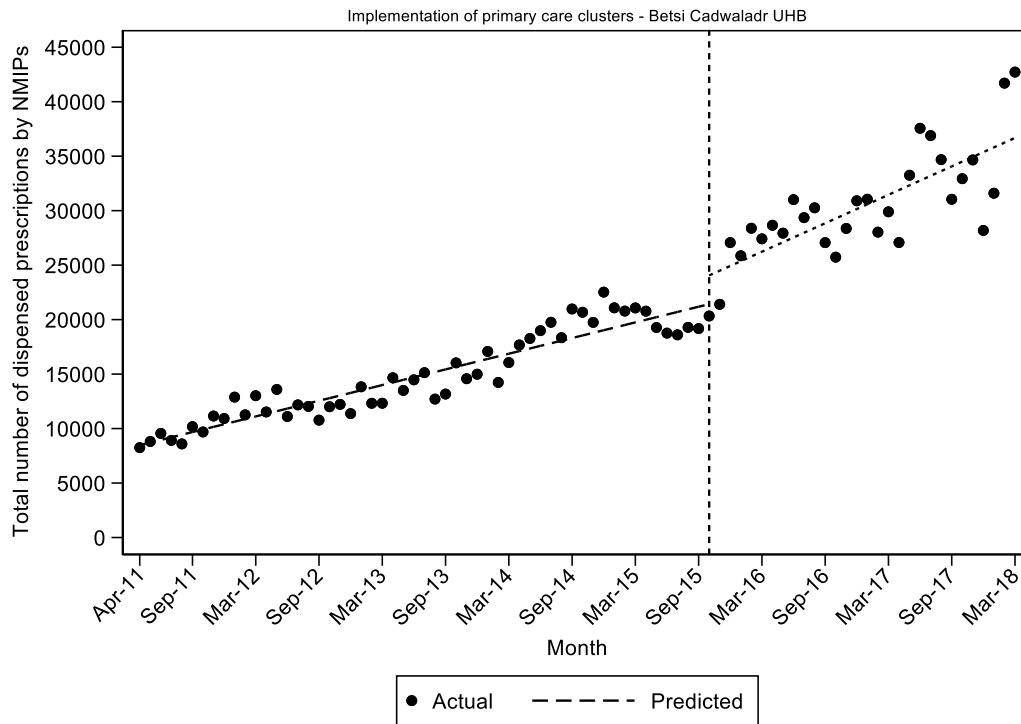

**Figure S3:** Observed and predicted dispensed prescriptions in primary care by NMIPs prior to and following the implementation of primary care clusters in October 2015 (Betsi Cadwaladr University Health Board)

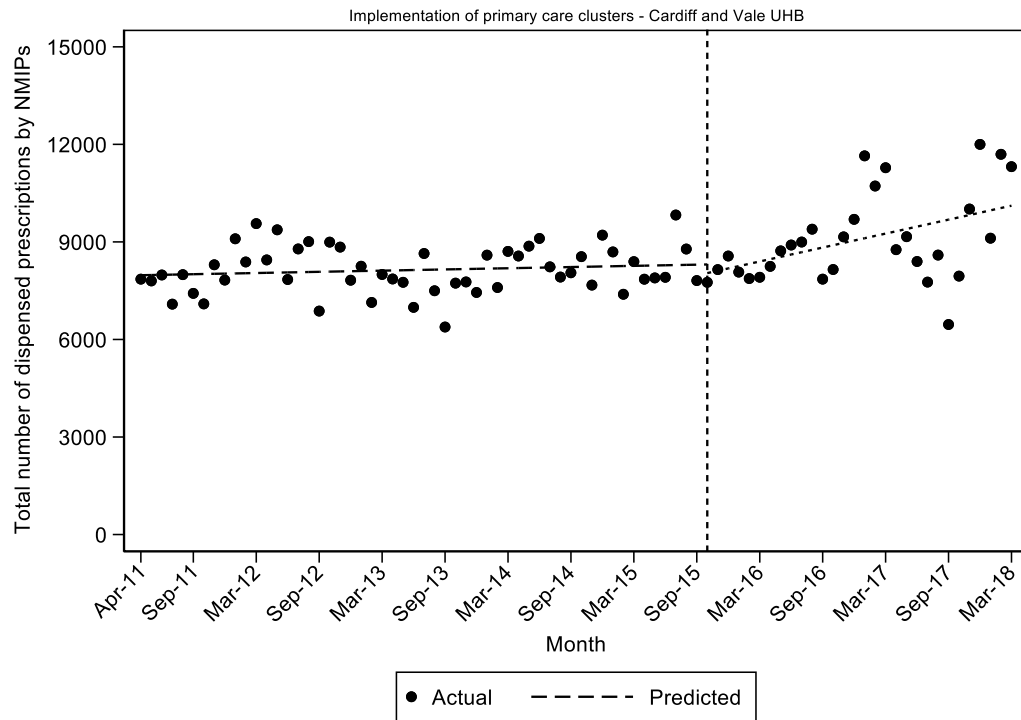

**Figure S4:** Observed and predicted dispensed prescriptions in primary care by NMIPs prior to and following the implementation of primary care clusters in October 2015 (Cardiff and Vale University Health Board)

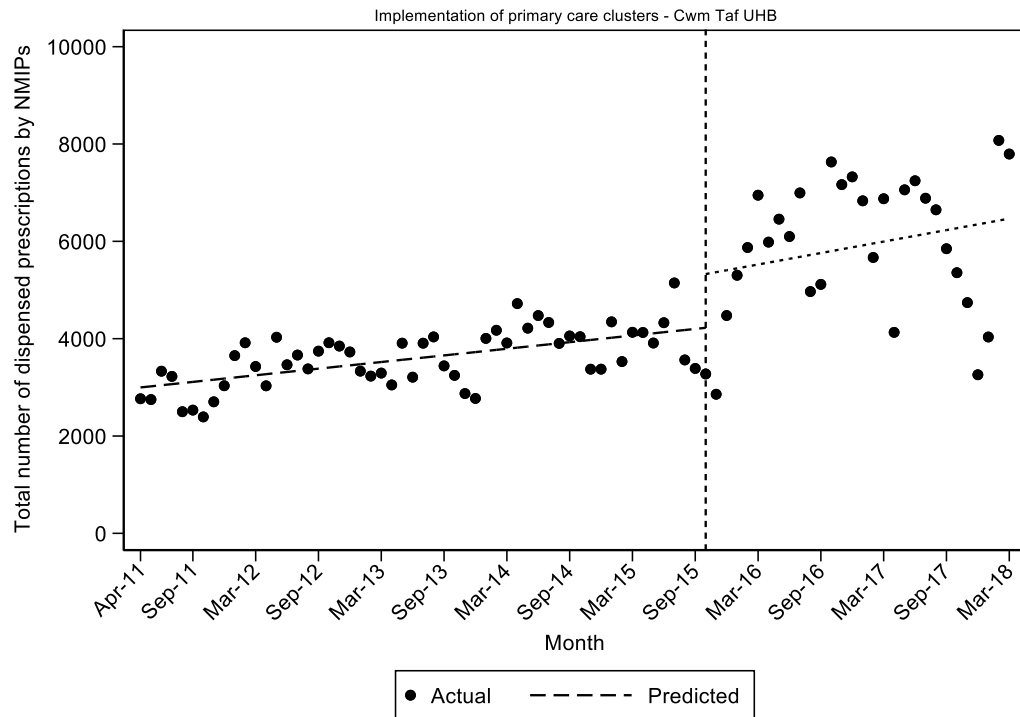

**Figure S5:** Observed and predicted dispensed prescriptions in primary care by NMIPs prior to and following the implementation of primary care clusters in October 2015 (Cwm Taf University Health Board)

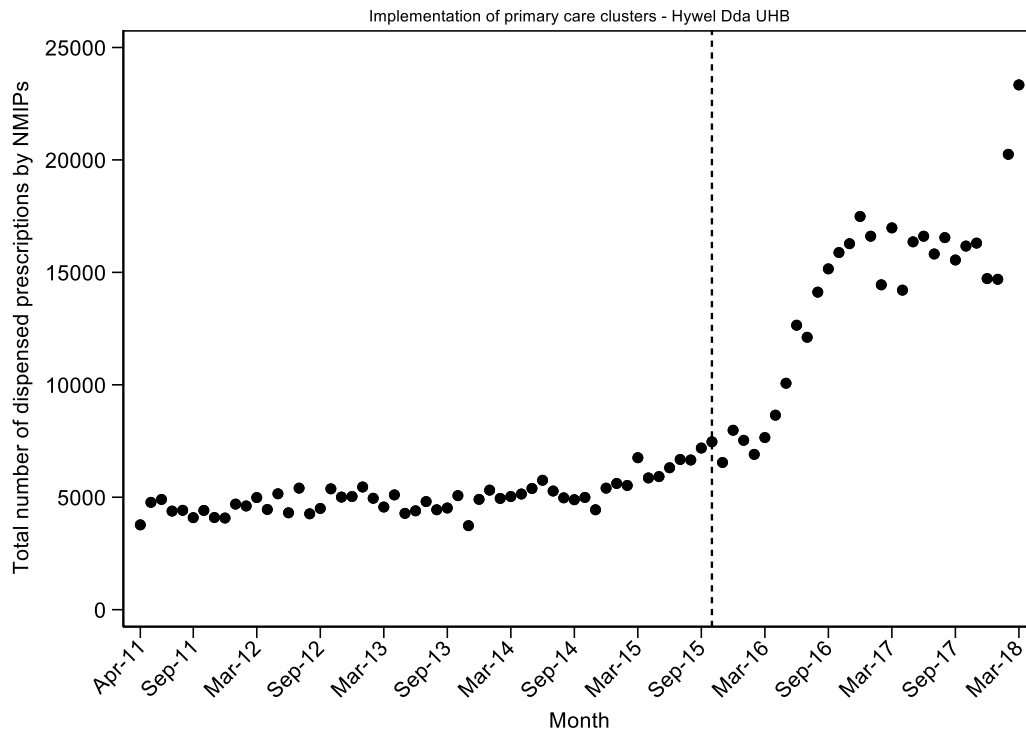

**Figure S6:** Observed dispensed prescriptions in primary care by NMIPs prior to and following the implementation of primary care clusters in October 2015 (Hywel Dda University Health Board)



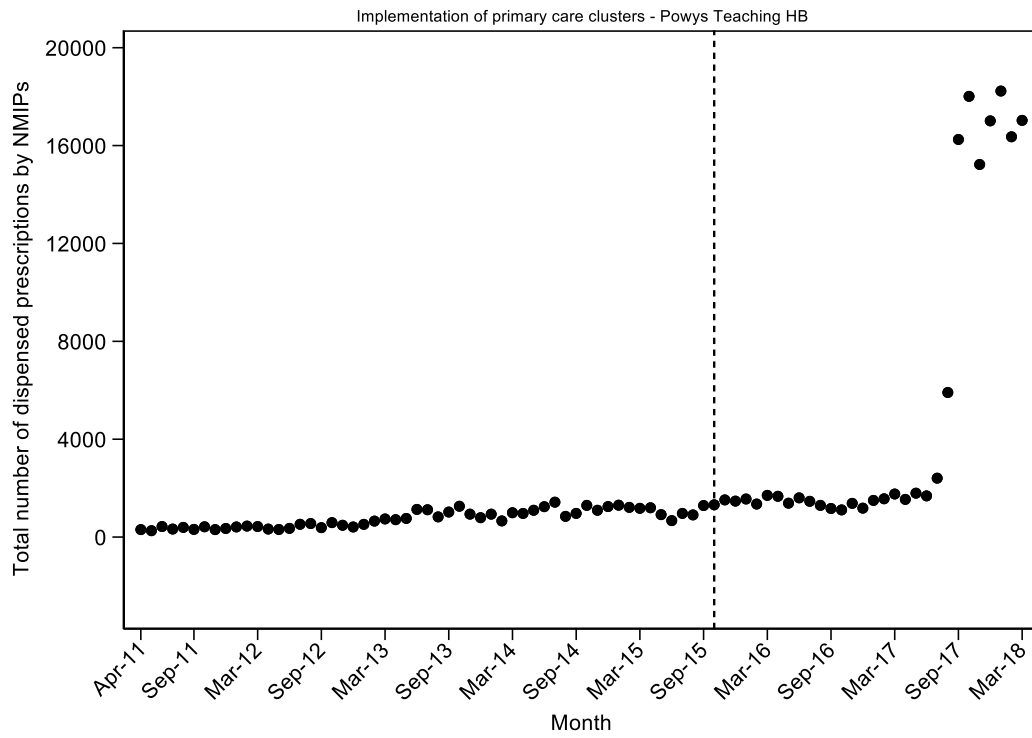

**Figure S7:** Observed dispensed prescriptions in primary care by NMIPs prior to and following the implementation of primary care clusters in October 2015 (Powys Teaching Health Board)

**Sensitivity analysis 1:** Excluding Powys teaching health board from the All Wales analysis**Table S3:** All Wales analysis excluding Powys Teaching Health Board

| Variable                | Coefficient | Lower 95% CI | Upper 95% CI | p-value |
|-------------------------|-------------|--------------|--------------|---------|
| Intercept               | 31490.9     | 29914.3      | 33067.5      | <0.001  |
| Pre-intervention slope  | 477.5       | 426.4        | 528.5        | <0.001  |
| Level change            | 7353.0      | 1450.0       | 13255.9      | 0.015   |
| Post-intervention slope | 826.4       | 314.7        | 1338.1       | 0.002   |

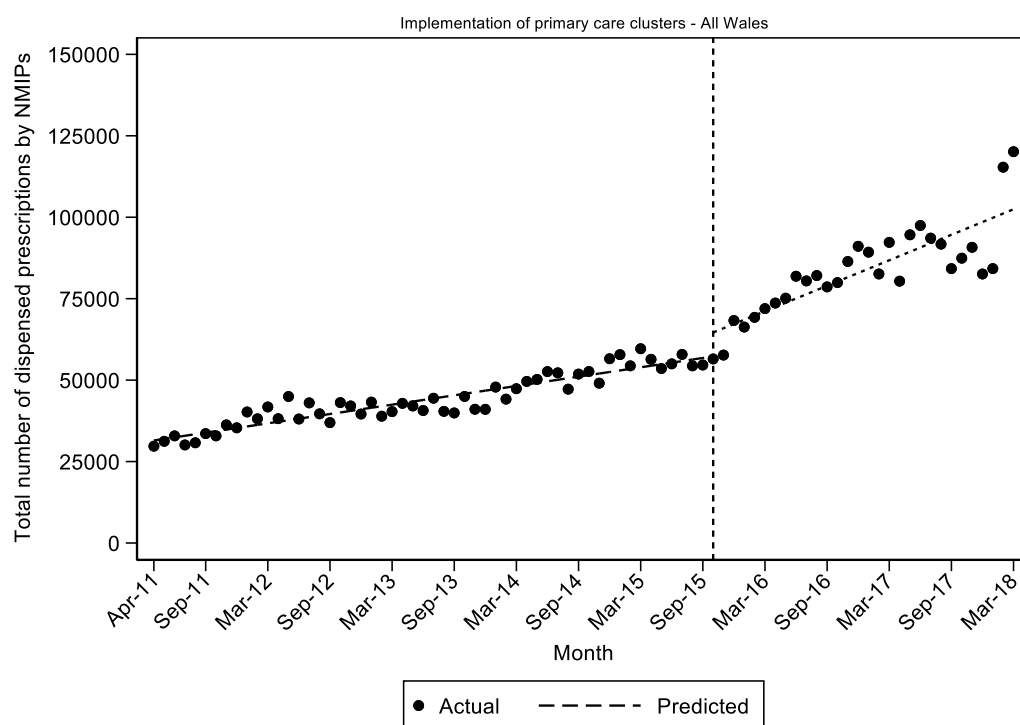**Figure S8:** Observed and predicted dispensed prescriptions in primary care by NMIPs prior to and following the implementation of primary care clusters in October 2015 (All Wales, excluding Powys Teaching Health Board)

**Sensitivity analysis 2:** Excluding Powys teaching health board and the final two months of data points from the All Wales analysis

**Table S4:** All Wales analysis excluding Powys Teaching Health Board and the final two months of observations

| Variable                | Coefficient | Lower 95% CI | Upper 95% CI | p-value |
|-------------------------|-------------|--------------|--------------|---------|
| Intercept               | 31490.9     | 29489.3      | 33492.6      | <0.001  |
| Pre-intervention slope  | 477.5       | 416.1        | 538.8        | <0.001  |
| Level change            | 9762.5      | 2570.3       | 16954.6      | 0.008   |
| Post-intervention slope | 563.5       | 44.0         | 1083.1       | 0.034   |

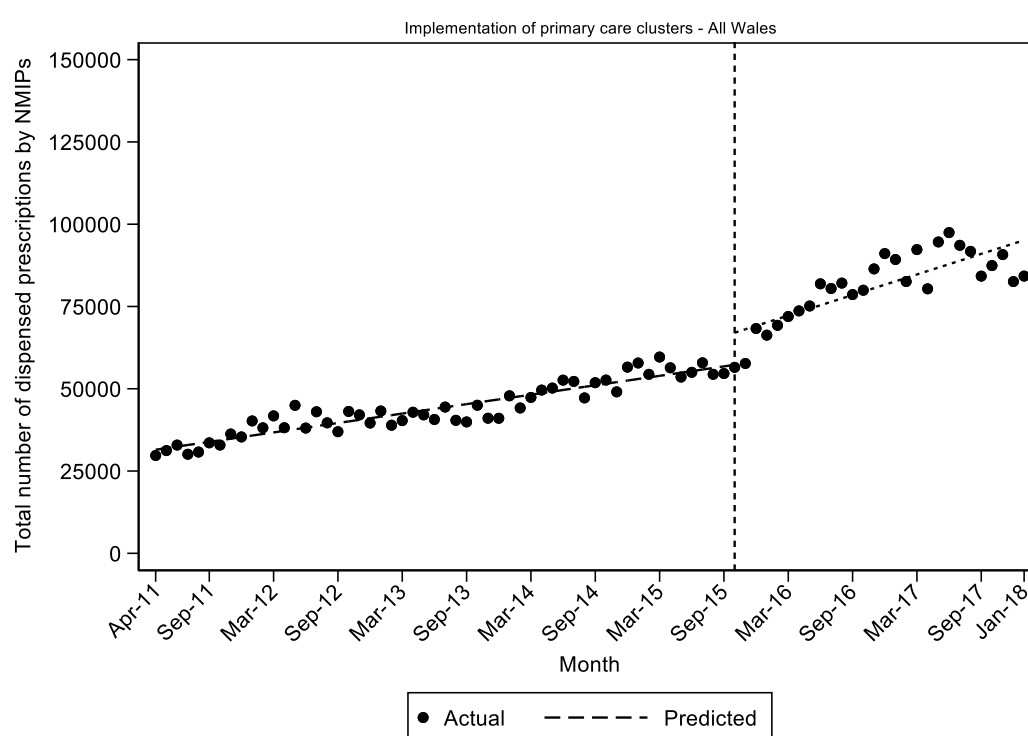

**Figure S9:** Observed and predicted dispensed prescriptions in primary care by NMIPs prior to and following the implementation of primary care clusters in October 2015 (All Wales, excluding Powys Teaching Health Board and the final two months of observations)

Findings were robust to the two sensitivity analyses 1: excluding PTHB (Table S3 and Figure S8) and 2: excluding PTHB and the final two months of observations (Table S4 and Figure S9) as presented above.
